# Supplementary material
Source: MDPI journal article supplement (https://www.mdpi.com/2075-5309/14/1/215)
Supplement: s1 [file s1]

Table S3 Calculation of accuracy indicators for the Logistic model in the chamber

| 15°C, 60% |                   |               | 15°C, 75% |                   |               | 15°C, 85% |                   |               |
|-----------|-------------------|---------------|-----------|-------------------|---------------|-----------|-------------------|---------------|
| Time (h)  | Predictive Dt(mm) | Actual Dt(mm) | Time (h)  | Predictive Dt(mm) | Actual Dt(mm) | Time (h)  | Predictive Dt(mm) | Actual Dt(mm) |
| 24        | 3.127715012       | 0.000         | 24        | 3.356535344       | 0.000         | 24        | 3.205992318       | 0.000         |
| 48        | 3.825220587       | 0.000         | 48        | 4.118360144       | 0.000         | 48        | 3.920295701       | 0.000         |
| 72        | 4.667549786       | 0.000         | 72        | 5.039436472       | 0.000         | 72        | 4.781868474       | 0.000         |
| 96        | 5.679638134       | 0.000         | 96        | 6.146426647       | 3.770         | 96        | 5.815409011       | 3.479         |
| 120       | 6.88833067        | 4.603         | 120       | 7.467351646       | 4.795         | 120       | 7.047143542       | 4.218         |
| 144       | 8.321387076       | 6.989         | 144       | 9.030137992       | 8.392         | 144       | 8.503665879       | 8.279         |
| 168       | 10.00591631       | 10.133        | 168       | 10.86047768       | 11.022        | 168       | 10.21018781       | 9.987         |
| 192       | 11.96615976       | 12.597        | 192       | 12.97897239       | 13.860        | 192       | 12.18814782       | 12.544        |
| 216       | 14.22062915       | 15.770        | 216       | 15.39768092       | 17.087        | 216       | 14.4522335        | 15.805        |
| 240       | 16.77875334       | 17.917        | 240       | 18.11640411       | 19.171        | 240       | 17.00703982       | 17.835        |
| 264       | 19.63739005       | 21.940        | 264       | 21.11928939       | 23.254        | 264       | 19.843795         | 21.795        |
| 288       | 22.77777563       | 24.853        | 288       | 24.37253809       | 26.205        | 288       | 22.93778343       | 24.301        |
| 312       | 26.16364183       | 28.202        | 312       | 27.82403818       | 29.782        | 312       | 26.24719657       | 28.209        |
| 336       | 29.74122482       | 32.277        | 336       | 31.40552125       | 33.126        | 336       | 29.71405017       | 31.880        |
| 360       | 33.44164981       | 34.283        | 360       | 35.03733503       | 36.439        | 360       | 33.26746946       | 34.258        |
| 384       | 37.18569465       | 37.633        | 384       | 38.63525148       | 38.975        | 384       | 36.82910864       | 37.411        |
| 408       | 40.89033828       | 40.607        | 408       | 42.1181346        | 42.298        | 408       | 40.31989841       | 40.658        |
| 432       | 44.475994         | 43.963        | 432       | 45.41502475       | 44.054        | 432       | 43.66692537       | 42.848        |
| 456       | 47.87312295       | 47.107        | 456       | 48.47037869       | 45.706        | 456       | 46.80920753       | 46.122        |

|           |              |           |             |             |             |             |              |             |
|-----------|--------------|-----------|-------------|-------------|-------------|-------------|--------------|-------------|
| 480       | 51.02710862  | 49.964    | 480         | 51.24675349 | 49.064      | 480         | 49.70145732  | 47.754      |
| 504       | 53.90076806  | 52.161    | 504         | 53.7249005  | 52.621      | 504         | 52.31547673  | 50.943      |
| 528       | 56.47447397  | 54.023    | 528         | 55.90178897 | 54.085      | 528         | 54.63938845  | 52.528      |
| 552       | 58.74435173  | 57.270    | 552         | 57.78736126 | 57.092      | 552         | 56.67529255  | 56.088      |
| 576       | 60.71927035  | 59.847    | 576         | 59.40082695 | 58.902      | 576         | 58.43607892  | 57.633      |
| 600       | 62.41736104  | 62.043    | 600         | 60.76712462 | 61.016      | 600         | 59.94205699  | 59.052      |
| 624       | 63.86264651  | 63.537    | 624         | 61.91393335 | 61.897      | 624         | 61.21787863  | 61.203      |
| 648       | 65.08214847  | 64.659    | 648         | 62.86939074 | 63.097      | 648         | 62.29001712  | 62.368      |
| 672       | 66.10363661  | 66.496    | 672         | 63.66051157 | 64.236      | 672         | 63.18488709  | 62.946      |
| 696       | 66.95403135  | 67.957    | 696         | 64.31221013 | 65.370      | 696         | 63.92757062  | 63.931      |
| 720       | 67.65838248  | 68.592    | 720         | 64.84679284 | 65.682      | 720         | 64.54105106  | 64.869      |
| 744       | 68.23930668  | 68.723    | 744         | 65.28378795 | 65.741      | 744         | 65.04583571  | 65.312      |
| 768       | 68.71676223  | 69.348    | 768         | 65.6399982  | 65.979      | 768         | 65.45985372  | 65.701      |
| 792       | 69.10805279  | 69.474    | 792         | 65.92968709 | 66.129      | 792         | 65.79853412  | 66.662      |
| 816       | 69.4279744   | 69.908    | 816         | 66.16483454 | 66.519      | 816         | 66.07499028  | 67.339      |
| 840       | 69.68904129  | 70.649    | 840         | 66.35541809 | 66.808      | 840         | 66.30025821  | 67.751      |
|           |              |           |             |             |             |             |              |             |
|           |              |           | 1.630243789 | 0.212252554 | 0.212252554 | 1.671574881 | 0.223125836  | 0.223125836 |
| 1.4963789 | 0.175041563  | 0.1750416 | 1.557428736 | 0.192408184 | 0.192408184 | 1.670632025 | 0.222880802  | 0.222880802 |
| 1.1906737 | 0.075792766  | 0.0757928 | 1.076083971 | 0.031846162 | 0.031846162 | 1.027136838 | 0.011628305  | 0.011628305 |
| 0.9874557 | -0.005482367 | 0.0054824 | 0.985345462 | -0.00641148 | 0.006411479 | 1.022347833 | 0.009598681  | 0.009598681 |
| 0.9499549 | -0.02229701  | 0.022297  | 0.936456316 | -0.02851248 | 0.028512477 | 0.971605863 | -0.012509873 | 0.012509873 |
| 0.9017599 | -0.044909058 | 0.0449091 | 0.901160619 | -0.0451978  | 0.045197795 | 0.914389668 | -0.03886869  | 0.03886869  |
| 0.9364653 | -0.028508297 | 0.0285083 | 0.944973612 | -0.02458032 | 0.024580319 | 0.953576665 | -0.020644385 | 0.020644385 |

|           |              |           |             |             |             |             |              |             |
|-----------|--------------|-----------|-------------|-------------|-------------|-------------|--------------|-------------|
| 0.8950633 | -0.048146259 | 0.0481463 | 0.908200283 | -0.04181837 | 0.041818367 | 0.91047465  | -0.040732142 | 0.040732142 |
| 0.9165144 | -0.037860713 | 0.0378607 | 0.930080924 | -0.03147926 | 0.031479263 | 0.943922283 | -0.025063762 | 0.025063762 |
| 0.9277302 | -0.032578291 | 0.0325783 | 0.934246416 | -0.02953856 | 0.029538559 | 0.930465693 | -0.031299635 | 0.031299635 |
| 0.9214276 | -0.035538797 | 0.0355388 | 0.948068311 | -0.02316037 | 0.023160369 | 0.93205929  | -0.03055646  | 0.03055646  |
| 0.9754697 | -0.010786197 | 0.0107862 | 0.961533934 | -0.01703538 | 0.017035384 | 0.971100327 | -0.0127359   | 0.0127359   |
| 0.9881105 | -0.00519448  | 0.0051945 | 0.991282912 | -0.00380238 | 0.00380238  | 0.984437211 | -0.006811979 | 0.006811979 |
| 1.0069893 | 0.003024848  | 0.0030248 | 0.995757078 | -0.0018466  | 0.001846598 | 0.99169645  | -0.003621241 | 0.003621241 |
| 1.0116668 | 0.005037519  | 0.0050375 | 1.030900315 | 0.013216672 | 0.013216672 | 1.019104408 | 0.00821868   | 0.00821868  |
| 1.016259  | 0.007004391  | 0.0070044 | 1.060481746 | 0.025503197 | 0.025503197 | 1.014907112 | 0.006426296  | 0.006426296 |
| 1.0212723 | 0.009141539  | 0.0091415 | 1.044479368 | 0.018899866 | 0.018899866 | 1.040791928 | 0.017363915  | 0.017363915 |
| 1.0333467 | 0.014246038  | 0.014246  | 1.020988027 | 0.009020649 | 0.009020649 | 1.02693638  | 0.011543539  | 0.011543539 |
| 1.0453751 | 0.019272157  | 0.0192722 | 1.033599009 | 0.014352084 | 0.014352084 | 1.040205387 | 0.017119098  | 0.017119098 |
| 1.0257389 | 0.011036826  | 0.0110368 | 1.012183208 | 0.005259128 | 0.005259128 | 1.010466409 | 0.004521881  | 0.004521881 |
| 1.0145792 | 0.006285973  | 0.006286  | 1.008473041 | 0.003664293 | 0.003664293 | 1.013943156 | 0.006013608  | 0.006013608 |
| 1.0060382 | 0.00261448   | 0.0026145 | 0.995918425 | -0.00177623 | 0.001776233 | 1.01506813  | 0.006495193  | 0.006495193 |
| 1.0051253 | 0.002220207  | 0.0022202 | 1.000273573 | 0.000118795 | 0.000118795 | 1.000239017 | 0.000103791  | 0.000103791 |
| 1.00655   | 0.00283536   | 0.0028354 | 0.996392709 | -0.00156946 | 0.001569459 | 0.998749633 | -0.000543367 | 0.000543367 |
| 0.9940994 | -0.002570169 | 0.0025702 | 0.991048744 | -0.00390498 | 0.003904985 | 1.003795111 | 0.001645076  | 0.001645076 |
| 0.985244  | -0.006456189 | 0.0064562 | 0.98381842  | -0.00708505 | 0.00708505  | 0.999946358 | -2.3297E-05  | 2.3297E-05  |
| 0.9863888 | -0.005951855 | 0.0059519 | 0.987281072 | -0.00555919 | 0.005559189 | 0.994944443 | -0.002201169 | 0.002201169 |
| 0.9929577 | -0.003069242 | 0.0030692 | 0.993045253 | -0.00303096 | 0.00303096  | 0.995924726 | -0.001773485 | 0.001773485 |
| 0.9908917 | -0.003973827 | 0.0039738 | 0.994865744 | -0.00223552 | 0.002235523 | 0.996329641 | -0.001596949 | 0.001596949 |
| 0.994735  | -0.002292606 | 0.0022926 | 0.996991024 | -0.00130875 | 0.001308752 | 0.987044144 | -0.005663424 | 0.005663424 |
| 0.9931294 | -0.002994143 | 0.0029941 | 0.994672734 | -0.00231979 | 0.002319787 | 0.981229158 | -0.008229555 | 0.008229555 |

|           |              |              |             |             |              |             |              |              |
|-----------|--------------|--------------|-------------|-------------|--------------|-------------|--------------|--------------|
| 0.9864191 | -0.005938524 | 0.0059385    | 0.993225633 | -0.00295208 | 0.002952081  | 0.978587153 | -0.00940049  | 0.00940049   |
|           | <b>Af</b>    | <b>1.049</b> |             | <b>Af</b>   | <b>1.060</b> |             | <b>Af</b>    | <b>1.059</b> |
|           | <b>Bf</b>    | <b>1.002</b> |             | <b>Bf</b>   | <b>1.018</b> |             | <b>Bf</b>    | <b>1.021</b> |
|           | 2.284997336  | 5.2212128    |             | 2.376176647 | 5.646215457  |             | 2.336409011  | 5.458807068  |
|           | 1.332581521  | 1.7757735    |             | 2.672684979 | 7.143244999  |             | 2.828893542  | 8.002638669  |
|           | -0.127111471 | 0.0161573    |             | 0.638471325 | 0.407645633  |             | 0.224665879  | 0.050474757  |
|           | -0.630395799 | 0.3973989    |             | -0.16152232 | 0.02608946   |             | 0.223187805  | 0.049812796  |
|           | -1.549231962 | 2.4001197    |             | -0.88069428 | 0.775622415  |             | -0.356185514 | 0.12686812   |
|           | -1.138357775 | 1.2958584    |             | -1.68881908 | 2.852109901  |             | -1.353099838 | 1.830879171  |
|           | -2.30227662  | 5.3004776    |             | -1.05492923 | 1.112875676  |             | -0.827960176 | 0.685518054  |
|           | -2.074835479 | 4.3049423    |             | -2.13471061 | 4.556989378  |             | -1.951205002 | 3.80720096   |
|           | -2.038135952 | 4.1539982    |             | -1.83221191 | 3.357000469  |             | -1.362716573 | 1.856996458  |
|           | -2.53610851  | 6.4318464    |             | -1.95829515 | 3.834919889  |             | -1.961470095 | 3.847364935  |
|           | -0.8409613   | 0.7072159    |             | -1.72027875 | 2.959358979  |             | -2.165949832 | 4.691338674  |
|           | -0.447438685 | 0.2002014    |             | -1.40166497 | 1.964664695  |             | -0.990030544 | 0.980160478  |
|           | 0.2838105    | 0.0805484    |             | -0.33974852 | 0.115429059  |             | -0.582224688 | 0.338985588  |
|           | 0.512910669  | 0.2630774    |             | -0.1794654  | 0.03220783   |             | -0.33760159  | 0.113974834  |
|           | 0.765914613  | 0.5866252    |             | 1.361274754 | 1.853068955  |             | 0.818592032  | 0.670092915  |
|           | 1.062853065  | 1.1296566    |             | 2.76437869  | 7.64178954   |             | 0.687540858  | 0.472712432  |
|           | 1.73940695   | 3.0255365    |             | 2.18235349  | 4.762666757  |             | 1.947957321  | 3.794537726  |
|           | 2.451307304  | 6.0089075    |             | 1.104400497 | 1.219700458  |             | 1.372226731  | 1.883006202  |
|           | 1.474073948  | 2.172894     |             | 1.817188966 | 3.302175737  |             | 2.111888445  | 4.460072804  |
|           | 0.872520352  | 0.7612918    |             | 0.695561257 | 0.483805462  |             | 0.587042553  | 0.344618959  |
|           | 0.374627709  | 0.1403459    |             | 0.499076955 | 0.249077807  |             | 0.803578915  | 0.645739073  |

|  |              |           |  |             |             |  |              |             |
|--|--------------|-----------|--|-------------|-------------|--|--------------|-------------|
|  | 0.32564651   | 0.1060456 |  | -0.24904205 | 0.062021943 |  | 0.889806986  | 0.791756472 |
|  | 0.423515134  | 0.1793651 |  | 0.016933354 | 0.000286738 |  | 0.014628634  | 0.000213997 |
|  | -0.392363391 | 0.153949  |  | -0.22760926 | 0.051805974 |  | -0.077982881 | 0.00608133  |
|  | -1.002768648 | 1.005545  |  | -0.57498843 | 0.330611698 |  | 0.238887087  | 0.057067041 |
|  | -0.933617524 | 0.8716417 |  | -1.05778987 | 1.118919406 |  | -0.003429381 | 1.17607E-05 |
|  | -0.483968316 | 0.2342253 |  | -0.83540716 | 0.697905124 |  | -0.327948935 | 0.107550504 |
|  | -0.631648885 | 0.3989803 |  | -0.45721205 | 0.209042855 |  | -0.266164295 | 0.070843432 |
|  | -0.365780541 | 0.1337954 |  | -0.3387518  | 0.114752783 |  | -0.24114628  | 0.058151528 |
|  | -0.480308935 | 0.2306967 |  | -0.19897958 | 0.039592873 |  | -0.863665876 | 0.745918745 |
|  | -0.959469825 | 0.9205823 |  | -0.35436546 | 0.12557488  |  | -1.264009725 | 1.597720584 |
|  |              |           |  | -0.45258191 | 0.204830386 |  | -1.450741794 | 2.104651754 |
|  |              | 50.608912 |  |             | 57.25200322 |  |              | 49.65176782 |
|  | <b>RMSE</b>  | 1.344     |  | <b>RMSE</b> | 1.405       |  | <b>RMSE</b>  | 1.308       |

| 20°C, 60% |                   |               | 20°C, 75% |                   |               | 20°C, 85% |                   |               |
|-----------|-------------------|---------------|-----------|-------------------|---------------|-----------|-------------------|---------------|
| Time (h)  | Predictive Dt(mm) | Actual Dt(mm) | Time (h)  | Predictive Dt(mm) | Actual Dt(mm) | Time (h)  | Predictive Dt(mm) | Actual Dt(mm) |
| 24        | 5.715242613       | 0.000         | 24        | 5.382460673       | 0.000         | 24        | 5.064210098       | 0.000         |
| 48        | 7.293613344       | 4.118         | 48        | 6.733671593       | 3.923         | 48        | 6.44692798        | 3.452         |
| 72        | 9.2549271         | 5.634         | 72        | 8.389983234       | 5.303         | 72        | 8.168802107       | 4.031         |
| 96        | 11.66121694       | 9.084         | 96        | 10.40208074       | 7.984         | 96        | 10.29063955       | 6.242         |
| 120       | 14.56768204       | 14.398        | 120       | 12.81981365       | 12.934        | 120       | 12.87179387       | 11.729        |
| 144       | 18.01278129       | 21.239        | 144       | 15.6870869        | 17.496        | 144       | 15.96281739       | 16.232        |
| 168       | 22.00632601       | 24.600        | 168       | 19.03504449       | 21.884        | 168       | 19.59563646       | 21.109        |

|           |              |           |             |             |             |             |             |             |
|-----------|--------------|-----------|-------------|-------------|-------------|-------------|-------------|-------------|
| 192       | 26.51775659  | 28.533    | 192         | 22.87405696 | 24.965      | 192         | 23.7722661  | 27.174      |
| 216       | 31.46812239  | 33.654    | 216         | 27.18572393 | 29.314      | 216         | 28.45431426 | 31.154      |
| 240       | 36.72972314  | 38.680    | 240         | 31.91680131 | 32.807      | 240         | 33.55659487 | 36.969      |
| 264       | 42.13602581  | 42.220    | 264         | 36.97729606 | 38.626      | 264         | 38.94829639 | 40.882      |
| 288       | 47.50124429  | 46.475    | 288         | 42.24453241 | 41.888      | 288         | 44.46366258 | 45.340      |
| 312       | 52.64513599  | 51.800    | 312         | 47.57361553 | 46.353      | 312         | 49.92113427 | 49.870      |
| 336       | 57.41626898  | 57.303    | 336         | 52.8127487  | 52.488      | 336         | 55.14661536 | 52.844      |
| 360       | 61.70770231  | 59.970    | 360         | 57.82013455 | 56.389      | 360         | 59.99476909 | 57.498      |
| 384       | 65.46225394  | 64.287    | 384         | 62.47859277 | 60.080      | 384         | 64.36310113 | 64.041      |
| 408       | 68.66833848  | 66.962    | 408         | 66.70488399 | 65.669      | 408         | 68.19651396 | 66.188      |
| 432       | 71.34983162  | 70.905    | 432         | 70.45257459 | 70.181      | 432         | 71.48332341 | 68.708      |
| 456       | 73.55390271  | 73.188    | 456         | 73.70918953 | 74.168      | 456         | 74.24584491 | 71.928      |
| 480       | 75.33980149  | 74.866    | 480         | 76.48961128 | 77.572      | 480         | 76.52906891 | 77.090      |
| 504       | 76.77015458  | 76.904    | 504         | 78.82795296 | 80.004      | 504         | 78.39012246 | 80.403      |
| 528       | 77.90512499  | 78.666    | 528         | 80.76970006 | 80.872      | 528         | 79.88996558 | 81.610      |
| 552       | 78.79907445  | 79.698    | 552         | 82.36519274 | 83.027      | 552         | 81.08770029 | 82.399      |
| 576       | 79.49909184  | 81.566    | 576         | 83.66484764 | 83.173      | 576         | 82.03721229 | 82.985      |
|           |              |           |             |             |             |             |             |             |
| 1.7713694 | 0.248309129  | 0.2483091 | 1.716678545 | 0.234688979 | 0.234688979 | 1.867592115 | 0.271282032 | 0.271282032 |
| 1.6426921 | 0.21555616   | 0.2155562 | 1.582120165 | 0.199239466 | 0.199239466 | 2.026411405 | 0.306727621 | 0.306727621 |
| 1.2837801 | 0.108490654  | 0.1084907 | 1.302865824 | 0.114899692 | 0.114899692 | 1.648612552 | 0.217118602 | 0.217118602 |
| 1.0117851 | 0.005088285  | 0.0050883 | 0.991184386 | -0.00384555 | 0.003845548 | 1.09745658  | 0.040387347 | 0.040387347 |
| 0.8481193 | -0.071543065 | 0.0715431 | 0.896609905 | -0.04739647 | 0.047396468 | 0.983431693 | -0.0072558  | 0.0072558   |
| 0.8945661 | -0.048387565 | 0.0483876 | 0.869808971 | -0.06057612 | 0.060576117 | 0.928296195 | -0.03231343 | 0.03231343  |

|           |              |                 |             |             |                    |             |              |                    |
|-----------|--------------|-----------------|-------------|-------------|--------------------|-------------|--------------|--------------------|
| 0.9293715 | -0.031810657 | 0.0318107       | 0.916255216 | -0.03798354 | 0.03798354         | 0.874824641 | -0.058078993 | 0.058078993        |
| 0.9350485 | -0.02916586  | 0.0291659       | 0.927398161 | -0.03273377 | 0.03273377         | 0.913343849 | -0.039365692 | 0.039365692        |
| 0.949571  | -0.022472553 | 0.0224726       | 0.97285735  | -0.01195084 | 0.011950836        | 0.90769959  | -0.042057861 | 0.042057861        |
| 0.998011  | -0.000864658 | 0.0008647       | 0.957316214 | -0.01894459 | 0.018944586        | 0.952700367 | -0.021043668 | 0.021043668        |
| 1.0220761 | 0.009483251  | 0.0094833       | 1.008510227 | 0.003680307 | 0.003680307        | 0.980662858 | -0.008480273 | 0.008480273        |
| 1.0163088 | 0.007025697  | 0.0070257       | 1.026336733 | 0.011289873 | 0.011289873        | 1.001035388 | 0.000449431  | 0.000449431        |
| 1.0019767 | 0.000857608  | 0.0008576       | 1.006187104 | 0.002678747 | 0.002678747        | 1.043570536 | 0.018521809  | 0.018521809        |
| 1.0289705 | 0.012402913  | 0.0124029       | 1.025386748 | 0.0108877   | 0.0108877          | 1.043423582 | 0.018460648  | 0.018460648        |
| 1.0182814 | 0.007867795  | 0.0078678       | 1.039929566 | 0.017003926 | 0.017003926        | 1.005029608 | 0.002178856  | 0.002178856        |
| 1.0254822 | 0.010928123  | 0.0109281       | 1.015771315 | 0.006795944 | 0.006795944        | 1.030353374 | 0.012986198  | 0.012986198        |
| 1.0062736 | 0.002716091  | 0.0027161       | 1.003866453 | 0.001675941 | 0.001675941        | 1.040395541 | 0.017198482  | 0.017198482        |
| 1.0049995 | 0.002165842  | 0.0021658       | 0.993817997 | -0.00269314 | 0.002693143        | 1.032224515 | 0.013774169  | 0.013774169        |
| 1.0063287 | 0.002739842  | 0.0027398       | 0.986046657 | -0.00610253 | 0.006102535        | 0.992721539 | -0.003172555 | 0.003172555        |
| 0.9982661 | -0.000753691 | 0.0007537       | 0.985301515 | -0.00643085 | 0.006430849        | 0.974965144 | -0.011010911 | 0.011010911        |
| 0.9903278 | -0.004221039 | 0.004221        | 0.998731951 | -0.00055106 | 0.000551056        | 0.978929727 | -0.009248483 | 0.009248483        |
| 0.9887167 | -0.004928123 | 0.0049281       | 0.992025693 | -0.00347708 | 0.00347708         | 0.984088961 | -0.00696564  | 0.00696564         |
| 0.9746597 | -0.011146997 | 0.011147        | 1.005913549 | 0.002560658 | 0.002560658        | 0.988575829 | -0.004990012 | 0.004990012        |
|           | <b>Af</b>    | <b>1.089794</b> |             | <b>Af</b>   | <b>1.087523261</b> |             | <b>Af</b>    | <b>1.123487374</b> |
|           | <b>Bf</b>    | <b>1.041727</b> |             | <b>Bf</b>   | <b>1.038018349</b> |             | <b>Bf</b>    | <b>1.06992234</b>  |
|           | 3.176113344  | 10.087696       |             | 2.811171593 | 7.902685727        |             | 2.99492798   | 8.969593606        |
|           | 3.6209271    | 13.111113       |             | 3.086983234 | 9.529465486        |             | 4.13763544   | 17.12002704        |
|           | 2.577716939  | 6.6446246       |             | 2.418080739 | 5.847114461        |             | 4.048639549  | 16.3914822         |
|           | 0.169682042  | 0.028792        |             | -0.11401969 | 0.013000489        |             | 1.143043867  | 1.306549283        |
|           | -3.225718705 | 10.405261       |             | -1.8089131  | 3.2721666          |             | -0.26893261  | 0.072324749        |

|  |              |           |  |             |             |  |              |             |
|--|--------------|-----------|--|-------------|-------------|--|--------------|-------------|
|  | -2.593673993 | 6.7271448 |  | -2.84912218 | 8.117497195 |  | -1.513613543 | 2.291025959 |
|  | -2.015243411 | 4.061206  |  | -2.09066526 | 4.370881239 |  | -3.401483902 | 11.57009274 |
|  | -2.18587761  | 4.7780609 |  | -2.12824829 | 4.529440778 |  | -2.699685737 | 7.288303081 |
|  | -1.950610191 | 3.8048801 |  | -0.89047647 | 0.79294834  |  | -3.412238466 | 11.64337135 |
|  | -0.083974187 | 0.0070517 |  | -1.64870394 | 2.718224671 |  | -1.933703606 | 3.739209637 |
|  | 1.025994289  | 1.0526643 |  | 0.356476856 | 0.127075749 |  | -0.876754086 | 0.768697727 |
|  | 0.844802653  | 0.7136915 |  | 1.220782196 | 1.490309171 |  | 0.051634265  | 0.002666097 |
|  | 0.113268976  | 0.0128299 |  | 0.324748703 | 0.10546172  |  | 2.302448691  | 5.301269972 |
|  | 1.737368976  | 3.018451  |  | 1.431523436 | 2.049259347 |  | 2.496769093  | 6.233855906 |
|  | 1.175253943  | 1.3812218 |  | 2.398953878 | 5.75497971  |  | 0.322101134  | 0.10374914  |
|  | 1.706338476  | 2.911591  |  | 1.035689546 | 1.072652837 |  | 2.00901396   | 4.036137093 |
|  | 0.444831622  | 0.1978752 |  | 0.271352366 | 0.073632106 |  | 2.775490076  | 7.703345163 |
|  | 0.365902708  | 0.1338848 |  | -0.45850491 | 0.210226753 |  | 2.317844906  | 5.372405007 |
|  | 0.473801488  | 0.2244879 |  | -1.08238872 | 1.171565335 |  | -0.561097762 | 0.314830698 |
|  | -0.133345421 | 0.017781  |  | -1.17593593 | 1.382825318 |  | -2.012877542 | 4.051675999 |
|  | -0.760875008 | 0.5789308 |  | -0.10254994 | 0.01051649  |  | -1.719534421 | 2.956798624 |
|  | -0.899258882 | 0.8086665 |  | -0.66208504 | 0.438356599 |  | -1.311049706 | 1.718851332 |
|  | -2.066908159 | 4.2721093 |  | 0.491847644 | 0.241914105 |  | -0.948037706 | 0.898775492 |
|  |              | 74.980015 |  |             | 61.22220023 |  |              | 119.8550379 |
|  | <b>RMSE</b>  | 1.936     |  | <b>RMSE</b> | 1.750       |  | <b>RMSE</b>  | 2.448       |

| 25°C, 60% |                   |               | 25°C, 75% |                   |               | 25°C, 85% |                   |               |
|-----------|-------------------|---------------|-----------|-------------------|---------------|-----------|-------------------|---------------|
| Time (h)  | Predictive Dt(mm) | Actual Dt(mm) | Time (h)  | Predictive Dt(mm) | Actual Dt(mm) | Time (h)  | Predictive Dt(mm) | Actual Dt(mm) |



|           |              |                 |             |             |                    |             |              |                    |
|-----------|--------------|-----------------|-------------|-------------|--------------------|-------------|--------------|--------------------|
| 24        | 9.644079948  | 5.356           | 24          | 9.410622698 | 4.531              | 24          | 9.675963535  | 7.233              |
| 48        | 15.50291058  | 17.201          | 48          | 16.03904749 | 16.220             | 48          | 16.08076884  | 18.213             |
| 72        | 23.97914685  | 23.939          | 72          | 25.90641434 | 29.239             | 72          | 25.49246371  | 25.446             |
| 96        | 35.16690787  | 38.415          | 96          | 38.82148746 | 40.332             | 96          | 37.84743753  | 38.118             |
| 120       | 48.27133119  | 47.996          | 120         | 53.14971631 | 51.368             | 120         | 51.86837183  | 51.509             |
| 144       | 61.6351812   | 57.783          | 144         | 66.40248686 | 64.975             | 144         | 65.37694247  | 64.621             |
| 168       | 73.47032253  | 75.444          | 168         | 76.75138041 | 77.003             | 168         | 76.48767108  | 77.415             |
| 192       | 82.71156092  | 82.802          | 192         | 83.8151069  | 84.629             | 192         | 84.49715105  | 84.230             |
|           |              |                 |             |             |                    |             |              |                    |
| 1.8006124 | 0.255420234  | 0.2554202       | 2.076941668 | 0.317424299 | 0.317424299        | 1.337798698 | 0.126390769  | 0.126390769        |
| 0.9012796 | -0.045140454 | 0.0451405       | 0.988856566 | -0.0048667  | 0.004866698        | 0.882922005 | -0.054077659 | 0.054077659        |
| 1.0016666 | 0.000723187  | 0.0007232       | 0.886037736 | -0.05254778 | 0.052547781        | 1.001839097 | 0.000797976  | 0.000797976        |
| 0.9154533 | -0.038363828 | 0.0383638       | 0.962539088 | -0.01658162 | 0.016581625        | 0.99289872  | -0.003095049 | 0.003095049        |
| 1.0057435 | 0.002487247  | 0.0024872       | 1.034692889 | 0.014811464 | 0.014811464        | 1.006984206 | 0.003022659  | 0.003022659        |
| 1.0666663 | 0.028028591  | 0.0280286       | 1.021963888 | 0.00943555  | 0.00943555         | 1.011694179 | 0.005049251  | 0.005049251        |
| 0.9738359 | -0.011514199 | 0.0115142       | 0.996735576 | -0.00142004 | 0.00142004         | 0.988016542 | -0.005235784 | 0.005235784        |
| 0.9989078 | -0.00047461  | 0.0004746       | 0.990380373 | -0.00419798 | 0.004197975        | 1.003175655 | 0.001376984  | 0.001376984        |
|           | <b>Af</b>    | <b>1.116269</b> |             | <b>Af</b>   | <b>1.128913533</b> |             | <b>Af</b>    | <b>1.058962952</b> |
|           | <b>Bf</b>    | <b>1.056564</b> |             | <b>Bf</b>   | <b>1.07834356</b>  |             | <b>Bf</b>    | <b>1.021594729</b> |
|           | 4.288079948  | 18.38763        |             | 4.879622698 | 23.81071768        |             | 2.443213535  | 5.969292376        |
|           | -1.69808942  | 2.8835077       |             | -0.18074418 | 0.032668459        |             | -2.132356157 | 4.54694278         |
|           | 0.039896853  | 0.0015918       |             | -3.33208566 | 11.10279487        |             | 0.046797042  | 0.002189963        |
|           | -3.247842131 | 10.548479       |             | -1.51088754 | 2.282781158        |             | -0.270687475 | 0.073271709        |
|           | 0.275664527  | 0.0759909       |             | 1.782091313 | 3.175849447        |             | 0.359746825  | 0.129417778        |

|  |              |              |  |             |              |  |              |              |
|--|--------------|--------------|--|-------------|--------------|--|--------------|--------------|
|  | 3.852181203  | 14.8393      |  | 1.427111863 | 2.036648269  |  | 0.755692473  | 0.571071114  |
|  | -1.973927467 | 3.8963896    |  | -0.25136959 | 0.06318667   |  | -0.927703917 | 0.860634558  |
|  | -0.090439084 | 0.0081792    |  | -0.81410143 | 0.662761141  |  | 0.26748438   | 0.071547894  |
|  |              | 50.641067    |  |             | 43.1674077   |  |              | 12.22436817  |
|  | <b>RMSE</b>  | <b>3.182</b> |  | <b>RMSE</b> | <b>2.938</b> |  | <b>RMSE</b>  | <b>1.564</b> |

| 30°C, 60% |                   |               | 30°C, 75%   |                   |               | 30°C, 85%   |                   |               |
|-----------|-------------------|---------------|-------------|-------------------|---------------|-------------|-------------------|---------------|
| Time (h)  | Predictive Dt(mm) | Actual Dt(mm) | Time (h)    | Predictive Dt(mm) | Actual Dt(mm) | Time (h)    | Predictive Dt(mm) | Actual Dt(mm) |
| 24        | 9.755764974       | 3.500         | 24          | 9.011068832       | 3.875         | 24          | 9.877477063       | 3.500         |
| 48        | 16.65118876       | 19.961        | 48          | 15.41540814       | 17.249        | 48          | 17.45803705       | 20.567        |
| 72        | 26.99435323       | 29.648        | 72          | 25.1812917        | 27.374        | 72          | 28.96797445       | 31.990        |
| 96        | 40.69923545       | 40.646        | 96          | 38.48550577       | 38.712        | 96          | 43.97963553       | 43.054        |
| 120       | 56.15407642       | 53.992        | 120         | 54.07556666       | 54.323        | 120         | 60.10557129       | 59.190        |
| 144       | 70.71000973       | 70.845        | 144         | 69.42090171       | 66.700        | 144         | 74.18915973       | 73.125        |
| 168       | 82.270733         | 82.858        | 168         | 82.14031822       | 83.718        | 168         | 84.43159327       | 85.567        |
|           |                   |               |             |                   |               |             |                   |               |
| 2.7873614 | 0.445193285       | 0.4451933     | 2.325437118 | 0.3665046         | 0.3665046     | 2.822136304 | 0.450577985       | 0.450577985   |
| 0.8341861 | -0.078737051      | 0.0787371     | 0.89370902  | -0.04880386       | 0.048803859   | 0.848836627 | -0.071175889      | 0.071175889   |
| 0.9104949 | -0.040722476      | 0.0407225     | 0.919898141 | -0.03626026       | 0.036260259   | 0.905521566 | -0.043101202      | 0.043101202   |
| 1.0013097 | 0.000568438       | 0.0005684     | 0.994144114 | -0.00255065       | 0.002550654   | 1.021503363 | 0.009239801       | 0.009239801   |
| 1.0400444 | 0.017051874       | 0.0170519     | 0.995445146 | -0.00198267       | 0.001982667   | 1.01546477  | 0.006664861       | 0.006664861   |
| 0.9980946 | -0.000828308      | 0.0008283     | 1.040793129 | 0.017364417       | 0.017364417   | 1.014552612 | 0.006274573       | 0.006274573   |
| 0.9929084 | -0.003090827      | 0.0030908     | 0.981154808 | -0.00826246       | 0.008262464   | 0.986734247 | -0.005799798      | 0.005799798   |

|  |              |                 |  |             |                    |  |              |                    |
|--|--------------|-----------------|--|-------------|--------------------|--|--------------|--------------------|
|  |              |                 |  |             |                    |  |              |                    |
|  | <b>Af</b>    | <b>1.212668</b> |  | <b>Af</b>   | <b>1.171705361</b> |  | <b>Af</b>    | <b>1.215319838</b> |
|  | <b>Bf</b>    | <b>1.118126</b> |  | <b>Bf</b>   | <b>1.098647685</b> |  | <b>Bf</b>    | <b>1.12300814</b>  |
|  | 6.255764974  | 39.134595       |  | 5.136068832 | 26.37920305        |  | 6.377477063  | 40.67221369        |
|  | -3.309811239 | 10.95485        |  | -1.83339186 | 3.361325711        |  | -3.108979616 | 9.665754252        |
|  | -2.653646773 | 7.0418412       |  | -2.1927083  | 4.807969687        |  | -3.022400546 | 9.134905061        |
|  | 0.053235453  | 0.002834        |  | -0.22669423 | 0.051390272        |  | 0.925802201  | 0.857109715        |
|  | 2.162076423  | 4.6745745       |  | -0.24743334 | 0.061223256        |  | 0.915362954  | 0.837889338        |
|  | -0.134990269 | 0.0182224       |  | 2.720901713 | 7.403306134        |  | 1.06415973   | 1.13243593         |
|  | -0.587600333 | 0.3452742       |  | -1.57768178 | 2.489079794        |  | -1.135106729 | 1.288467287        |
|  |              | 62.172192       |  |             | 44.5534979         |  |              | 63.58877527        |
|  | <b>RMSE</b>  | <b>3.942</b>    |  | <b>RMSE</b> | <b>3.337</b>       |  | <b>RMSE</b>  | <b>3.987</b>       |
