# Supplementary material
Source: MDPI journal article supplement (https://www.mdpi.com/2075-5309/14/1/215)
Supplement: s1 [file s1]

Table S1 Record of mold growth diameter in the chamber

[illegible]

| <b>T (°C)</b> | <b>RH (%)</b> | <b>day 0</b> | <b>day 1</b> | <b>day 2</b> | <b>day 3</b> | <b>day 4</b> | <b>day 5</b> | <b>day 6</b> | <b>day 7</b> | <b>day 8</b> |  |  |  |
|---------------|---------------|--------------|--------------|--------------|--------------|--------------|--------------|--------------|--------------|--------------|--|--|--|
| 20°C          | 60%           | 0.000        | 5.356        | 17.201       | 23.939       | 38.415       | 47.996       | 57.783       | 75.444       | 82.802       |  |  |  |
|               | 75%           | 0.000        | 4.531        | 16.220       | 29.239       | 40.332       | 51.368       | 64.975       | 77.003       | 84.629       |  |  |  |
|               | 85%           | 0.000        | 7.233        | 18.213       | 25.446       | 38.118       | 51.509       | 64.621       | 77.415       | 84.230       |  |  |  |
| <b>T (°C)</b> | <b>RH (%)</b> | <b>day 0</b> | <b>day 1</b> | <b>day 2</b> | <b>day 3</b> | <b>day 4</b> | <b>day 5</b> | <b>day 6</b> | <b>day 7</b> |              |  |  |  |
| 30°C          | 60%           | 0.000        | 3.500        | 19.961       | 29.648       | 40.646       | 53.992       | 70.845       | 82.858       |              |  |  |  |
|               | 75%           | 0.000        | 3.875        | 17.249       | 27.374       | 38.712       | 54.323       | 66.700       | 83.718       |              |  |  |  |
|               | 85%           | 0.000        | 3.500        | 20.567       | 31.990       | 43.054       | 59.190       | 73.125       | 85.567       |              |  |  |  |
