# Supplementary material
Source: MDPI journal article supplement (https://www.mdpi.com/2075-5309/14/1/215)
Supplement: s1 [file s1]

Table S2 Calculation of accuracy indicators for the Gompertz model in the chamber

| 15°C, 60% |                   |               | 15°C, 75% |                   |               | 15°C, 85% |                   |               |
|-----------|-------------------|---------------|-----------|-------------------|---------------|-----------|-------------------|---------------|
| Time (h)  | Predictive Dt(mm) | Actual Dt(mm) | Time (h)  | Predictive Dt(mm) | Actual Dt(mm) | Time (h)  | Predictive Dt(mm) | Actual Dt(mm) |
| 24        | 0.777646865       | 0.000         | 24        | 0.933178021       | 0.000         | 24        | 0.883670356       | 0.000         |
| 48        | 1.342661278       | 0.000         | 48        | 1.600910433       | 0.000         | 48        | 1.499737579       | 0.000         |
| 72        | 2.172103257       | 0.000         | 72        | 2.567960334       | 0.000         | 72        | 2.388491091       | 0.000         |
| 96        | 3.318134204       | 0.000         | 96        | 3.883838522       | 3.770         | 96        | 3.59695749        | 3.479         |
| 120       | 4.819198405       | 4.603         | 120       | 5.579126037       | 4.795         | 120       | 5.15669165        | 4.218         |
| 144       | 6.694793713       | 6.989         | 144       | 7.661043946       | 8.392         | 144       | 7.079472782       | 8.279         |
| 168       | 8.943009678       | 10.133        | 168       | 10.11263807       | 11.022        | 168       | 9.355895477       | 9.987         |
| 192       | 11.54097337       | 12.597        | 192       | 12.89526155       | 13.860        | 192       | 11.95675994       | 12.544        |
| 216       | 14.44773643       | 15.770        | 216       | 15.95341836       | 17.087        | 216       | 14.83662988       | 15.805        |
| 240       | 17.60878089       | 17.917        | 240       | 19.22079505       | 19.171        | 240       | 17.93866644       | 17.835        |
| 264       | 20.96123218       | 21.940        | 264       | 22.62639385       | 23.254        | 264       | 21.19984292       | 21.795        |
| 288       | 24.43898189       | 24.853        | 288       | 26.09995876       | 26.205        | 288       | 24.55581532       | 24.301        |
| 312       | 27.97714762       | 28.202        | 312       | 29.57622516       | 29.782        | 312       | 27.94497194       | 28.209        |
| 336       | 31.51554822       | 32.277        | 336       | 32.99783017       | 33.126        | 336       | 31.31143319       | 31.880        |
| 360       | 35.0010929        | 34.283        | 360       | 36.31694769       | 36.439        | 360       | 34.60697422       | 34.258        |
| 384       | 38.38914353       | 37.633        | 384       | 39.49584821       | 38.975        | 384       | 37.79197943       | 37.411        |
| 408       | 41.64400724       | 40.607        | 408       | 42.50664193       | 42.298        | 408       | 40.83561181       | 40.658        |
| 432       | 44.73875879       | 43.963        | 432       | 45.3304661        | 44.054        | 432       | 43.71540377       | 42.848        |
| 456       | 47.65459532       | 47.107        | 456       | 47.95634627       | 45.706        | 456       | 46.4164664        | 46.122        |

|             |                  |             |             |             |             |             |                  |             |
|-------------|------------------|-------------|-------------|-------------|-------------|-------------|------------------|-------------|
| 480         | 50.37990461      | 49.964      | 480         | 50.37991425 | 49.064      | 480         | 48.93048504      | 47.754      |
| 504         | 52.90919399      | 52.161      | 504         | 52.60211651 | 52.621      | 504         | 51.25463242      | 50.943      |
| 528         | 55.24199055      | 54.023      | 528         | 54.62800128 | 54.085      | 528         | 53.39049394      | 52.528      |
| 552         | 57.38178903      | 57.270      | 552         | 56.46563644 | 57.092      | 552         | 55.34306725      | 56.088      |
| 576         | 59.33509495      | 59.847      | 576         | 58.1251823  | 58.902      | 576         | 57.11987215      | 57.633      |
| 600         | 61.1105881       | 62.043      | 600         | 59.61812395 | 61.016      | 600         | 58.73018686      | 59.052      |
| 624         | 62.71841496      | 63.537      | 624         | 60.95665546 | 61.897      | 624         | 60.18441326      | 61.203      |
| 648         | 64.16960769      | 64.659      | 648         | 62.1532009  | 63.097      | 648         | 61.49356427      | 62.368      |
| 672         | 65.4756202       | 66.496      | 672         | 63.22005381 | 64.236      | 672         | 62.66886164      | 62.946      |
| 696         | 66.64796819      | 67.957      | 696         | 64.16911603 | 65.370      | 696         | 63.72142983      | 63.931      |
| 720         | 67.6979586       | 68.592      | 720         | 65.01171751 | 65.682      | 720         | 64.66207112      | 64.869      |
| 744         | 68.6364937       | 68.723      | 744         | 65.75850064 | 65.741      | 744         | 65.50110741      | 65.312      |
| 768         | 69.47393621      | 69.348      | 768         | 66.41935467 | 65.979      | 768         | 66.24827594      | 65.701      |
| 792         | 70.22002316      | 69.474      | 792         | 67.00338799 | 66.129      | 792         | 66.91266722      | 66.662      |
| 816         | 70.88381768      | 69.908      | 816         | 67.51892855 | 66.519      | 816         | 67.50269547      | 67.339      |
| 840         | 71.47368999      | 70.649      | 840         | 67.97354405 | 66.808      | 840         | 68.02609353      | 67.751      |
|             |                  |             | 1.030127584 | 0.012891016 | 0.012891016 | 1.033905574 | 0.014480877      | 0.014480877 |
| 1.046893209 | 0.019902383      | 0.019902383 | 1.163610825 | 0.065807753 | 0.065807753 | 1.222471795 | 0.087238848      | 0.087238848 |
| 0.957931031 | -<br>0.018665758 | 0.018665758 | 0.91293473  | -0.03956027 | 0.039560271 | 0.855112064 | -<br>0.067976966 | 0.067976966 |
| 0.882560462 | -<br>0.054255532 | 0.054255532 | 0.917495743 | -0.03739594 | 0.037395942 | 0.936807397 | -<br>0.028349689 | 0.028349689 |
| 0.916200728 | -<br>0.038009367 | 0.038009367 | 0.930416428 | -0.03132263 | 0.03132263  | 0.953160253 | -<br>0.020834076 | 0.020834076 |

|             |                  |             |             |             |             |             |                  |             |
|-------------|------------------|-------------|-------------|-------------|-------------|-------------|------------------|-------------|
| 0.916161298 | -<br>0.038028058 | 0.038028058 | 0.933685563 | -0.02979936 | 0.029799357 | 0.938710343 | -<br>0.027468397 | 0.027468397 |
| 0.982791298 | -<br>0.007538697 | 0.007538697 | 1.002579983 | 0.00111903  | 0.00111903  | 1.005812528 | 0.002517041      | 0.002517041 |
| 0.955403402 | -<br>0.019813217 | 0.019813217 | 0.97301083  | -0.01188233 | 0.011882326 | 0.972692953 | -0.01202423      | 0.01202423  |
| 0.98335671  | -<br>0.007288915 | 0.007288915 | 0.996001059 | -0.0017402  | 0.0017402   | 1.010506587 | 0.004539149      | 0.004539149 |
| 0.992034894 | -<br>0.003473052 | 0.003473052 | 0.993079515 | -0.00301598 | 0.003015976 | 0.990651996 | -<br>0.004078881 | 0.004078881 |
| 0.976398759 | -<br>0.010372781 | 0.010372781 | 0.996136853 | -0.00168099 | 0.001680992 | 0.982165408 | -<br>0.007815366 | 0.007815366 |
| 1.020957616 | 0.009007713      | 0.009007713 | 0.996650503 | -0.00145711 | 0.00145711  | 1.010201393 | 0.004407963      | 0.004407963 |
| 1.020088952 | 0.008638044      | 0.008638044 | 1.013363649 | 0.005765321 | 0.005765321 | 1.01017462  | 0.004396453      | 0.004396453 |
| 1.025549574 | 0.010956658      | 0.010956658 | 1.00494217  | 0.002141071 | 0.002141071 | 1.004380786 | 0.001898396      | 0.001898396 |
| 1.017643791 | 0.007595787      | 0.007595787 | 1.028980872 | 0.012407302 | 0.012407302 | 1.020235803 | 0.00870056       | 0.00870056  |
| 1.011620026 | 0.005017418      | 0.005017418 | 1.049235248 | 0.020872872 | 0.020872872 | 1.006391784 | 0.002767083      | 0.002767083 |
| 1.008318928 | 0.00359792       | 0.00359792  | 1.026811991 | 0.011490932 | 0.011490932 | 1.024647095 | 0.010574313      | 0.010574313 |
| 1.014336913 | 0.00618223       | 0.00618223  | 0.99965064  | -0.00015175 | 0.000151752 | 1.006112339 | 0.002646475      | 0.002646475 |
| 1.022561134 | 0.009689282      | 0.009689282 | 1.010047246 | 0.004341689 | 0.004341689 | 1.016429374 | 0.007077207      | 0.007077207 |
| 1.001947105 | 0.000844795      | 0.000844795 | 0.989032338 | -0.00478951 | 0.004789508 | 0.986714102 | -<br>0.005808665 | 0.005808665 |
| 0.991450579 | -<br>0.003728929 | 0.003728929 | 0.986815881 | -0.00576387 | 0.00576387  | 0.99110523  | -<br>0.003880232 | 0.003880232 |

|             |                  |              |             |             |              |             |                  |              |
|-------------|------------------|--------------|-------------|-------------|--------------|-------------|------------------|--------------|
| 0.984975755 | -0.00657446      | 0.00657446   | 0.977087339 | -0.01006661 | 0.010066614  | 0.994546133 | -<br>0.002375067 | 0.002375067  |
| 0.987116404 | -<br>0.005631631 | 0.005631631  | 0.984807914 | -0.00664847 | 0.00664847   | 0.983353225 | -<br>0.007290454 | 0.007290454  |
| 0.992436808 | -<br>0.003297137 | 0.003297137  | 0.985042092 | -0.00654521 | 0.006545211  | 0.985979417 | -<br>0.006132151 | 0.006132151  |
| 0.98465502  | -<br>0.006715901 | 0.006715901  | 0.984191822 | -0.00692025 | 0.006920248  | 0.995597205 | -<br>0.001916331 | 0.001916331  |
| 0.980740238 | -<br>0.008446006 | 0.008446006  | 0.981629433 | -0.00805243 | 0.008052428  | 0.996721932 | -<br>0.001425985 | 0.001425985  |
| 0.986965806 | -<br>0.005697893 | 0.005697893  | 0.989792021 | -0.00445605 | 0.004456051  | 0.99681005  | -<br>0.001387592 | 0.001387592  |
| 0.998737236 | -<br>0.000548758 | 0.000548758  | 1.000266206 | 0.000115596 | 0.000115596  | 1.002895447 | 0.00125566       | 0.00125566   |
| 1.001810065 | 0.00078539       | 0.00078539   | 1.006677978 | 0.002890568 | 0.002890568  | 1.008329796 | 0.003602601      | 0.003602601  |
| 1.010740588 | 0.004639706      | 0.004639706  | 1.013227566 | 0.005706997 | 0.005706997  | 1.00375726  | 0.001628699      | 0.001628699  |
| 1.013954489 | 0.006018462      | 0.006018462  | 1.015029173 | 0.006478524 | 0.006478524  | 1.002430916 | 0.001054452      | 0.001054452  |
| 1.01168006  | 0.00504319       | 0.00504319   | 1.017446175 | 0.007511443 | 0.007511443  | 1.004060361 | 0.001759822      | 0.001759822  |
|             | <b>Af</b>        | <b>1.025</b> |             | <b>Af</b>   | <b>1.027</b> |             | <b>Af</b>        | <b>1.026</b> |
|             | <b>Bf</b>        | <b>0.990</b> |             | <b>Bf</b>   | <b>0.996</b> |             | <b>Bf</b>        | <b>0.997</b> |
|             | 0.215865071      | 0.046597729  |             | 0.113588522 | 0.012902352  |             | 0.11795749       | 0.01391397   |
|             | -<br>0.294011842 | 0.086442963  |             | 0.784459371 | 0.615376504  |             | 0.93844165       | 0.88067273   |
|             | -<br>1.190018099 | 1.416143077  |             | -0.73062272 | 0.533809561  |             | -<br>1.199527218 | 1.438865547  |

|  |                  |             |  |             |             |  |                  |             |
|--|------------------|-------------|--|-------------|-------------|--|------------------|-------------|
|  | -<br>1.055582183 | 1.114253746 |  | -0.90936193 | 0.826939112 |  | -<br>0.631104523 | 0.398292919 |
|  | -<br>1.322124678 | 1.748013665 |  | -0.96440512 | 0.930077226 |  | -<br>0.587573395 | 0.345242495 |
|  | -<br>0.308330221 | 0.095067525 |  | -1.13308164 | 1.283873993 |  | -<br>0.968703458 | 0.938386389 |
|  | -<br>0.978434489 | 0.95733405  |  | 0.049461717 | 0.002446461 |  | 0.103666438      | 0.01074673  |
|  | -<br>0.413629221 | 0.171089133 |  | -0.62760615 | 0.393889486 |  | -<br>0.595157084 | 0.354211955 |
|  | -<br>0.224630157 | 0.050458708 |  | -0.10479124 | 0.010981205 |  | 0.255315317      | 0.065185911 |
|  | -<br>0.761785109 | 0.580316552 |  | -0.20610818 | 0.04248058  |  | -<br>0.263694726 | 0.069534908 |
|  | 0.718481785      | 0.516216075 |  | -0.12796983 | 0.016376278 |  | -<br>0.568566806 | 0.323268213 |
|  | 0.756010192      | 0.571551411 |  | -0.12205231 | 0.014896767 |  | 0.349474219      | 0.122132229 |
|  | 1.037479467      | 1.076363644 |  | 0.520848206 | 0.271282854 |  | 0.380646096      | 0.14489145  |
|  | 0.775675459      | 0.601672418 |  | 0.209041927 | 0.043698527 |  | 0.178111811      | 0.031723817 |
|  | 0.547386987      | 0.299632513 |  | 1.276716105 | 1.630004013 |  | 0.867070437      | 0.751811142 |
|  | 0.416            | 0.172764136 |  | 2.250346266 | 5.064058318 |  | 0.294799732      | 0.086906882 |
|  | 0.747832878      | 0.559254014 |  | 1.31551425  | 1.730577742 |  | 1.176985038      | 1.385293779 |
|  | 1.218823883      | 1.485531657 |  | -0.01838349 | 0.000337953 |  | 0.311382418      | 0.09695901  |
|  | 0.111511249      | 0.012434759 |  | 0.543401281 | 0.295284952 |  | 0.862993937      | 0.744758535 |

|  |                  |              |  |             |              |  |                  |              |
|--|------------------|--------------|--|-------------|--------------|--|------------------|--------------|
|  | -<br>0.511655052 | 0.261790893  |  | -0.62616356 | 0.392080801  |  | -<br>0.745182747 | 0.555297327  |
|  | -<br>0.932145238 | 0.868894744  |  | -0.7765677  | 0.603057392  |  | -<br>0.512627852 | 0.262787315  |
|  | -<br>0.818585042 | 0.67008147   |  | -1.39804272 | 1.95452344   |  | -0.32206314      | 0.103724666  |
|  | -<br>0.489025642 | 0.239146079  |  | -0.94034454 | 0.884247853  |  | -<br>1.018836736 | 1.038028294  |
|  | -<br>1.020379803 | 1.041174941  |  | -0.9437991  | 0.890756741  |  | -<br>0.874435726 | 0.76463784   |
|  | -<br>1.308831811 | 1.713040709  |  | -1.01544619 | 1.031130961  |  | -<br>0.277138362 | 0.076805671  |
|  | -<br>0.894041401 | 0.799310027  |  | -1.20088397 | 1.442122315  |  | -<br>0.209570166 | 0.043919654  |
|  | -<br>0.086781303 | 0.007530995  |  | -0.67048249 | 0.449546775  |  | -<br>0.206928883 | 0.042819563  |
|  | 0.125525102      | 0.015756551  |  | 0.017500643 | 0.000306273  |  | 0.189107408      | 0.035761612  |
|  | 0.746189822      | 0.55679925   |  | 0.440604668 | 0.194132474  |  | 0.547275943      | 0.299510958  |
|  | 0.975534342      | 0.951667252  |  | 0.874721328 | 0.765137402  |  | 0.25046722       | 0.062733828  |
|  | 0.825178877      | 0.680920179  |  | 0.999728548 | 0.999457169  |  | 0.163695469      | 0.026796207  |
|  |                  |              |  | 1.165544052 | 1.358492936  |  | 0.275093529      | 0.07567645   |
|  |                  | 19.36725086  |  |             | 24.68428642  |  |                  | 11.591298    |
|  | <b>RMSE</b>      | <b>0.832</b> |  | <b>RMSE</b> | <b>0.923</b> |  | <b>RMSE</b>      | <b>0.632</b> |

|                  |                  |                  |
|------------------|------------------|------------------|
| <b>20°C, 60%</b> | <b>20°C, 75%</b> | <b>20°C, 85%</b> |
|------------------|------------------|------------------|

| Time (h) | Predictive Dt(mm) | Actual Dt(mm) | Time (h) | Predictive Dt(mm) | Actual Dt(mm) | Time (h) | Predictive Dt(mm) | Actual Dt(mm) |
|----------|-------------------|---------------|----------|-------------------|---------------|----------|-------------------|---------------|
| 24       | 2.810016493       | 0.000         | 24       | 2.779162235       | 0.000         | 24       | 2.181987415       | 0.000         |
| 48       | 4.636895719       | 4.118         | 48       | 4.321472949       | 3.923         | 48       | 3.674761384       | 3.452         |
| 72       | 7.116362676       | 5.634         | 72       | 6.366074686       | 5.303         | 72       | 5.758731315       | 4.031         |
| 96       | 10.26500644       | 9.084         | 96       | 8.943527105       | 7.984         | 96       | 8.481393447       | 6.242         |
| 120      | 14.04200373       | 14.398        | 120      | 12.05219464       | 12.934        | 120      | 11.84063793       | 11.729        |
| 144      | 18.35699669       | 21.239        | 144      | 15.65877294       | 17.496        | 144      | 15.78558202       | 16.232        |
| 168      | 23.08491197       | 24.600        | 168      | 19.70273558       | 21.884        | 168      | 20.22508069       | 21.109        |
| 192      | 28.08325631       | 28.533        | 192      | 24.10335752       | 24.965        | 192      | 25.04081082       | 27.174        |
| 216      | 33.20816999       | 33.654        | 216      | 28.76782116       | 29.314        | 216      | 30.10161666       | 31.154        |
| 240      | 38.32695758       | 38.680        | 240      | 33.59911113       | 32.807        | 240      | 35.27649981       | 36.969        |
| 264      | 43.32625494       | 42.220        | 264      | 38.50278857       | 38.626        | 264      | 40.44469979       | 40.882        |
| 288      | 48.11605483       | 46.475        | 288      | 43.39215796       | 41.888        | 288      | 45.50232131       | 45.340        |
| 312      | 52.63040591       | 51.800        | 312      | 48.19170057       | 46.353        | 312      | 50.36570265       | 49.870        |
| 336      | 56.82579868       | 57.303        | 336      | 52.83890489       | 52.488        | 336      | 54.97213644       | 52.844        |
| 360      | 60.67819181       | 59.970        | 360      | 57.28477116       | 56.389        | 360      | 59.27870188       | 57.498        |
| 384      | 64.17944485       | 64.287        | 384      | 61.49332358       | 60.080        | 384      | 63.259935         | 64.041        |
| 408      | 67.33369935       | 66.962        | 408      | 65.44045715       | 65.669        | 408      | 66.904936         | 66.188        |
| 432      | 70.15404627       | 70.905        | 432      | 69.112402         | 70.181        | 432      | 70.21435379       | 68.708        |
| 456      | 72.65965576       | 73.188        | 456      | 72.50402895       | 74.168        | 456      | 73.19753665       | 71.928        |
| 480      | 74.87343091       | 74.866        | 480      | 75.61715805       | 77.572        | 480      | 75.87001328       | 77.090        |
| 504      | 76.82017431       | 76.904        | 504      | 78.45897727       | 80.004        | 504      | 78.25137664       | 80.403        |
| 528      | 78.52521526       | 78.666        | 528      | 81.04063368       | 80.872        | 528      | 80.36358011       | 81.610        |

|           |              |           |             |             |             |             |              |             |
|-----------|--------------|-----------|-------------|-------------|-------------|-------------|--------------|-------------|
| 552       | 80.01342748  | 79.698    | 552         | 83.37602561 | 83.027      | 552         | 82.22961847  | 82.399      |
| 576       | 81.30856336  | 81.566    | 576         | 85.48080079 | 83.173      | 576         | 83.87254583  | 82.985      |
|           |              |           |             |             |             |             |              |             |
| 1.1261435 | 0.051593721  | 0.0515937 | 1.101713945 | 0.042068847 | 0.042068847 | 1.064531108 | 0.027158357  | 0.027158357 |
| 1.2631102 | 0.101441231  | 0.1014412 | 1.200466658 | 0.079350102 | 0.079350102 | 1.428552027 | 0.154896062  | 0.154896062 |
| 1.1300717 | 0.053106006  | 0.053106  | 1.120181251 | 0.049288299 | 0.049288299 | 1.358762167 | 0.133143446  | 0.133143446 |
| 0.9752746 | -0.010873085 | 0.0108731 | 0.931834695 | -0.03066112 | 0.030661123 | 1.00953963  | 0.004123372  | 0.004123372 |
| 0.8643264 | -0.063322211 | 0.0633222 | 0.894991594 | -0.04818104 | 0.048181043 | 0.972512639 | -0.012104746 | 0.012104746 |
| 0.9384111 | -0.027606884 | 0.0276069 | 0.900319207 | -0.04560348 | 0.045603485 | 0.958114603 | -0.01858254  | 0.01858254  |
| 0.9842378 | -0.006899973 | 0.0069    | 0.965496724 | -0.0152492  | 0.015249196 | 0.921507367 | -0.035501188 | 0.035501188 |
| 0.9867525 | -0.005791747 | 0.0057917 | 0.981368917 | -0.0081677  | 0.008167702 | 0.966219961 | -0.014923995 | 0.014923995 |
| 0.9908642 | -0.003985862 | 0.0039859 | 1.024135905 | 0.010357592 | 0.010357592 | 0.954222696 | -0.020350258 | 0.020350258 |
| 1.0262022 | 0.011232922  | 0.0112329 | 0.996810143 | -0.00138755 | 0.001387552 | 0.989303356 | -0.004670518 | 0.004670518 |
| 1.0353049 | 0.015068276  | 0.0150683 | 1.035907668 | 0.015321048 | 0.015321048 | 1.003570868 | 0.001548046  | 0.001548046 |
| 1.0160245 | 0.006904165  | 0.0069042 | 1.039671086 | 0.016895966 | 0.016895966 | 1.009950023 | 0.004299883  | 0.004299883 |
| 0.9916723 | -0.003631811 | 0.0036318 | 1.006685431 | 0.002893783 | 0.002893783 | 1.040268773 | 0.017145562  | 0.017145562 |
| 1.0118035 | 0.005096168  | 0.0050962 | 1.015892572 | 0.006847785 | 0.006847785 | 1.030969806 | 0.013245946  | 0.013245946 |
| 0.998327  | -0.000727203 | 0.0007272 | 1.02353018  | 0.010100653 | 0.010100653 | 0.987803673 | -0.005329363 | 0.005329363 |
| 1.0055509 | 0.002404059  | 0.0024041 | 0.996516825 | -0.00151536 | 0.001515364 | 1.010839448 | 0.004682182  | 0.004682182 |
| 0.989409  | -0.004624136 | 0.0046241 | 0.984770567 | -0.00666494 | 0.00666494  | 1.021926473 | 0.00941965   | 0.00941965  |
| 0.992781  | -0.003146543 | 0.0031465 | 0.977568866 | -0.00985264 | 0.009852638 | 1.017650104 | 0.007598481  | 0.007598481 |
| 1.0000993 | 4.31043E-05  | 4.31E-05  | 0.974799645 | -0.01108464 | 0.011084638 | 0.984172386 | -0.006928825 | 0.006928825 |
| 0.9989165 | -0.000470817 | 0.0004708 | 0.980689543 | -0.00846846 | 0.008468455 | 0.973239514 | -0.011780267 | 0.011780267 |
| 0.9982103 | -0.000777932 | 0.0007779 | 1.002082095 | 0.000903302 | 0.000903302 | 0.984733151 | -0.006681441 | 0.006681441 |



|           |              |                 |             |             |                    |             |              |                    |
|-----------|--------------|-----------------|-------------|-------------|--------------------|-------------|--------------|--------------------|
| 1.0039536 | 0.001713635  | 0.0017136       | 1.004200401 | 0.00182039  | 0.00182039         | 0.997947402 | -0.000892348 | 0.000892348        |
| 0.9968438 | -0.001372877 | 0.0013729       | 1.027746995 | 0.011886215 | 0.011886215        | 1.010692211 | 0.004618919  | 0.004618919        |
|           | <b>Af</b>    | <b>1.038966</b> |             | <b>Af</b>   | <b>1.04446611</b>  |             | <b>Af</b>    | <b>1.053397804</b> |
|           | <b>Bf</b>    | <b>1.011617</b> |             | <b>Bf</b>   | <b>1.006115252</b> |             | <b>Bf</b>    | <b>1.024742008</b> |
|           | 0.519395719  | 0.2697719       |             | 0.398972949 | 0.159179414        |             | 0.222761384  | 0.049622634        |
|           | 1.482362676  | 2.1973991       |             | 1.063074686 | 1.130127789        |             | 1.727564648  | 2.984479613        |
|           | 1.181506444  | 1.3959575       |             | 0.959527105 | 0.920692264        |             | 2.239393447  | 5.014883013        |
|           | -0.355996269 | 0.1267333       |             | -0.88163869 | 0.777286786        |             | 0.111887933  | 0.012518909        |
|           | -2.881503307 | 8.3030613       |             | -1.83722706 | 3.375403283        |             | -0.446167978 | 0.199065864        |
|           | -1.515088031 | 2.2954917       |             | -2.18143109 | 4.758641588        |             | -0.884169309 | 0.781755367        |
|           | -0.449743695 | 0.2022694       |             | -0.86136471 | 0.741949157        |             | -2.13293918  | 4.549429544        |
|           | -0.445830008 | 0.1987644       |             | -0.54615106 | 0.298280981        |             | -1.052383344 | 1.107510702        |
|           | -0.35337575  | 0.1248744       |             | 0.791833354 | 0.627000061        |             | -1.692333524 | 2.863992756        |
|           | 1.106254945  | 1.2238          |             | -0.12321143 | 0.015181056        |             | -0.43730021  | 0.191231473        |
|           | 1.640804825  | 2.6922405       |             | 1.5041024   | 2.26232403         |             | 0.16190464   | 0.026213113        |
|           | 0.830072578  | 0.6890205       |             | 1.838867234 | 3.381432704        |             | 0.496202647  | 0.246217067        |
|           | -0.477201322 | 0.2277211       |             | 0.350904893 | 0.123134244        |             | 2.127969773  | 4.528255357        |
|           | 0.707858474  | 0.5010636       |             | 0.896160048 | 0.803102831        |             | 1.780701882  | 3.170899193        |
|           | -0.107555154 | 0.0115681       |             | 1.413684695 | 1.998504416        |             | -0.781065    | 0.610062534        |
|           | 0.371699347  | 0.1381604       |             | -0.2287373  | 0.052320751        |             | 0.717435997  | 0.51471441         |
|           | -0.750953728 | 0.5639315       |             | -1.06882022 | 1.142376663        |             | 1.506520458  | 2.269603892        |
|           | -0.52834424  | 0.2791476       |             | -1.66366549 | 2.767782866        |             | 1.269536646  | 1.611723296        |
|           | 0.007430911  | 5.522E-05       |             | -1.95484195 | 3.821407061        |             | -1.220153383 | 1.488774278        |
|           | -0.083325691 | 0.0069432       |             | -1.54491162 | 2.386751917        |             | -2.151623364 | 4.6294831          |

|  |              |              |  |             |              |  |              |              |
|--|--------------|--------------|--|-------------|--------------|--|--------------|--------------|
|  | -0.140784744 | 0.0198203    |  | 0.168383682 | 0.028353064  |  | -1.245919895 | 1.552316384  |
|  | 0.315094147  | 0.0992843    |  | 0.348747832 | 0.12162505   |  | -0.169131534 | 0.028605476  |
|  | -0.257436642 | 0.0662736    |  | 2.307800785 | 5.325944463  |  | 0.887295833  | 0.787293894  |
|  |              | 21.633353    |  |             | 37.01880244  |  |              | 39.21865187  |
|  | <b>RMSE</b>  | <b>1.040</b> |  | <b>RMSE</b> | <b>1.360</b> |  | <b>RMSE</b>  | <b>1.400</b> |

| 25°C, 60% |                   |               | 25°C, 60%   |                   |               | 25°C, 60%   |                   |               |
|-----------|-------------------|---------------|-------------|-------------------|---------------|-------------|-------------------|---------------|
| Time (h)  | Predictive Dt(mm) | Actual Dt(mm) | Time (h)    | Predictive Dt(mm) | Actual Dt(mm) | Time (h)    | Predictive Dt(mm) | Actual Dt(mm) |
| 24        | 7.904366429       | 5.356         | 24          | 7.213617405       | 4.531         | 24          | 8.062210688       | 7.233         |
| 48        | 15.04043937       | 17.201        | 48          | 15.51519726       | 16.220        | 48          | 15.91882894       | 18.213        |
| 72        | 24.69979914       | 23.939        | 72          | 26.93332672       | 29.239        | 72          | 26.52323221       | 25.446        |
| 96        | 36.2082909        | 38.415        | 96          | 40.06776136       | 40.332        | 96          | 38.9049578        | 38.118        |
| 120       | 48.62891714       | 47.996        | 120         | 53.33700789       | 51.368        | 120         | 51.86302743       | 51.509        |
| 144       | 61.04621814       | 57.783        | 144         | 65.53878147       | 64.975        | 144         | 64.35011985       | 64.621        |
| 168       | 72.74668324       | 75.444        | 168         | 76.02073618       | 77.003        | 168         | 75.65834897       | 77.415        |
| 192       | 83.27868602       | 82.802        | 192         | 84.59321178       | 84.629        | 192         | 85.43123001       | 84.230        |
|           |                   |               |             |                   |               |             |                   |               |
| 1.4757966 | 0.169026497       | 0.1690265     | 1.592058575 | 0.201959042       | 0.201959042   | 1.114681233 | 0.047150689       | 0.047150689   |
| 0.8743933 | -0.058293173      | 0.0582932     | 0.95655959  | -0.01928797       | 0.01928797    | 0.87403062  | -0.058473352      | 0.058473352   |
| 1.03177   | 0.013582881       | 0.0135829     | 0.92115966  | -0.03566509       | 0.035665089   | 1.042347703 | 0.018012614       | 0.018012614   |
| 0.9425622 | -0.025689985      | 0.02569       | 0.993439175 | -0.00285872       | 0.002858718   | 1.02064196  | 0.008873419       | 0.008873419   |
| 1.0131939 | 0.00569257        | 0.0056926     | 1.03833899  | 0.016339162       | 0.016339162   | 1.006880448 | 0.002977908       | 0.002977908   |
| 1.0564737 | 0.023858678       | 0.0238587     | 1.008671077 | 0.003749568       | 0.003749568   | 0.995804319 | -0.001825994      | 0.001825994   |

|           |              |                 |             |             |                    |             |              |                    |
|-----------|--------------|-----------------|-------------|-------------|--------------------|-------------|--------------|--------------------|
| 0.9642442 | -0.015812948 | 0.0158129       | 0.987247029 | -0.00557416 | 0.005574164        | 0.977303914 | -0.009970362 | 0.009970362        |
| 1.0057569 | 0.002493037  | 0.002493        | 0.999574656 | -0.00018476 | 0.000184764        | 1.014265322 | 0.006151577  | 0.006151577        |
|           |              |                 |             |             |                    |             |              |                    |
|           | <b>Af</b>    | <b>1.094728</b> |             | <b>Af</b>   | <b>1.085681181</b> |             | <b>Af</b>    | <b>1.045152081</b> |
|           | <b>Bf</b>    | <b>1.033611</b> |             | <b>Bf</b>   | <b>1.046669655</b> |             | <b>Bf</b>    | <b>1.003718808</b> |
|           | 2.548366429  | 6.4941715       |             | 2.682617405 | 7.19643614         |             | 0.829460688  | 0.688005032        |
|           | -2.160560633 | 4.6680222       |             | -0.7045944  | 0.496453272        |             | -2.294296062 | 5.263794421        |
|           | 0.760549142  | 0.578435        |             | -2.30517328 | 5.313823836        |             | 1.077565539  | 1.16114749         |
|           | -2.206459105 | 4.8684618       |             | -0.26461364 | 0.07002038         |             | 0.786832805  | 0.619105862        |
|           | 0.633250473  | 0.4010062       |             | 1.969382885 | 3.878468949        |             | 0.354402434  | 0.125601085        |
|           | 3.263218135  | 10.648593       |             | 0.563406469 | 0.317426849        |             | -0.271130147 | 0.073511556        |
|           | -2.697566761 | 7.2768664       |             | -0.98201382 | 0.964351146        |             | -1.757026028 | 3.087140463        |
|           | 0.476686016  | 0.2272296       |             | -0.03599655 | 0.001295752        |             | 1.201563342  | 1.443754466        |
|           |              | 35.162785       |             |             | 18.23827632        |             |              | 12.46206038        |
|           | <b>RMSE</b>  | <b>2.652</b>    |             | <b>RMSE</b> | <b>1.910</b>       |             | <b>RMSE</b>  | <b>1.579</b>       |

| 30°C, 60% |                   |               | 30°C, 60% |                   |               | 30°C, 60% |                   |               |
|-----------|-------------------|---------------|-----------|-------------------|---------------|-----------|-------------------|---------------|
| Time (h)  | Predictive Dt(mm) | Actual Dt(mm) | Time (h)  | Predictive Dt(mm) | Actual Dt(mm) | Time (h)  | Predictive Dt(mm) | Actual Dt(mm) |
| 24        | 8.024664348       | 3.500         | 24        | 7.345279085       | 3.875         | 24        | 7.896822411       | 3.500         |
| 48        | 16.39167078       | 19.961        | 48        | 15.05008561       | 17.249        | 48        | 17.23080169       | 20.567        |
| 72        | 27.94225905       | 29.648        | 72        | 25.9793622        | 27.374        | 72        | 30.11601826       | 31.990        |
| 96        | 41.61374382       | 40.646        | 96        | 39.36087771       | 38.712        | 96        | 44.90876983       | 43.054        |
| 120       | 56.02806358       | 53.992        | 120       | 53.99894694       | 54.323        | 120       | 59.77454851       | 59.190        |

|           |              |                 |             |             |                    |             |              |                    |
|-----------|--------------|-----------------|-------------|-------------|--------------------|-------------|--------------|--------------------|
| 144       | 69.96197905  | 70.845          | 144         | 68.6898665  | 66.700             | 144         | 73.34768523  | 73.125             |
| 168       | 82.58300836  | 82.858          | 168         | 82.49501636 | 83.718             | 168         | 84.91495126  | 85.567             |
|           |              |                 |             |             |                    |             |              |                    |
| 2.2927612 | 0.360358832  | 0.3603588       | 1.895555893 | 0.277736595 | 0.277736595        | 2.256234974 | 0.353384327  | 0.353384327        |
| 0.8211848 | -0.085559072 | 0.0855591       | 0.872529429 | -0.05921992 | 0.059219916        | 0.837788094 | -0.076865816 | 0.076865816        |
| 0.9424669 | -0.025733887 | 0.0257339       | 0.949052466 | -0.02270978 | 0.022709778        | 0.941408729 | -0.026221779 | 0.026221779        |
| 1.0238091 | 0.010218976  | 0.010219        | 1.016756416 | 0.007216921 | 0.007216921        | 1.043084119 | 0.018319334  | 0.018319334        |
| 1.0377105 | 0.016076198  | 0.0160762       | 0.994034699 | -0.00259846 | 0.002598455        | 1.009872244 | 0.004266436  | 0.004266436        |
| 0.9875359 | -0.005447119 | 0.0054471       | 1.029833081 | 0.012766838 | 0.012766838        | 1.003045268 | 0.001320533  | 0.001320533        |
| 0.9966772 | -0.001445494 | 0.0014455       | 0.985391629 | -0.00639113 | 0.006391132        | 0.99238315  | -0.003320618 | 0.003320618        |
|           | <b>Af</b>    | <b>1.180647</b> |             | <b>Af</b>   | <b>1.136370492</b> |             | <b>Af</b>    | <b>1.172464859</b> |
|           | <b>Bf</b>    | <b>1.092327</b> |             | <b>Bf</b>   | <b>1.070392384</b> |             | <b>Bf</b>    | <b>1.093194626</b> |
|           | 4.524664348  | 20.472587       |             | 3.470279085 | 12.04283693        |             | 4.396822411  | 19.33204731        |
|           | -3.569329225 | 12.740111       |             | -2.19871439 | 4.83434498         |             | -3.336214978 | 11.13033038        |
|           | -1.705740951 | 2.9095522       |             | -1.3946378  | 1.94501459         |             | -1.87435674  | 3.513213188        |
|           | 0.967743821  | 0.9365281       |             | 0.648677715 | 0.420782778        |             | 1.8549365    | 3.440789417        |
|           | 2.036063575  | 4.1455549       |             | -0.32405306 | 0.105010384        |             | 0.584340175  | 0.34145344         |
|           | -0.883020951 | 0.779726        |             | 1.989866503 | 3.959568698        |             | 0.22268523   | 0.049588712        |
|           | -0.275324977 | 0.0758038       |             | -1.22298364 | 1.495688972        |             | -0.651748739 | 0.424776419        |
|           |              | 42.059864       |             |             | 24.80324733        |             |              | 38.23219887        |
|           | <b>RMSE</b>  | <b>3.243</b>    |             | <b>RMSE</b> | <b>2.490</b>       |             | <b>RMSE</b>  | <b>3.092</b>       |
