# Supplementary material
Source: MDPI journal article supplement (https://www.mdpi.com/2075-5309/14/1/215)
Supplement: s1 [file s1]

Table S4 Fitting values of  $\mu$ m and  $\lambda$  at different temperatures and relative humidities

| Temperature(°C) | Relative humidity(%) | Fit value of $\mu\text{m}\times 100(\text{h}^{-1})$ | Fit value of $\lambda(\text{h})$ |
|-----------------|----------------------|-----------------------------------------------------|----------------------------------|
| 15              | 60                   | 12.17374                                            | 117.5977                         |
| 15.30612        | 60                   | 13.16662                                            | 113.6009                         |
| 15.61224        | 60                   | 14.16106                                            | 109.6915                         |
| 15.91837        | 60                   | 15.15706                                            | 105.8697                         |
| 16.22449        | 60                   | 16.1546                                             | 102.1355                         |
| 16.53061        | 60                   | 17.1537                                             | 98.48873                         |
| 16.83673        | 60                   | 18.15435                                            | 94.92952                         |
| 17.14286        | 60                   | 19.15655                                            | 91.45784                         |
| 17.44898        | 60                   | 20.1603                                             | 88.07369                         |
| 17.7551         | 60                   | 21.16561                                            | 84.77707                         |
| 18.06122        | 60                   | 22.17247                                            | 81.56798                         |
| 18.36735        | 60                   | 23.18088                                            | 78.44642                         |
| 18.67347        | 60                   | 24.19085                                            | 75.41238                         |
| 18.97959        | 60                   | 25.20236                                            | 72.46588                         |
| 19.28571        | 60                   | 26.21543                                            | 69.6069                          |
| 19.59184        | 60                   | 27.23006                                            | 66.83545                         |
| 19.89796        | 60                   | 28.24623                                            | 64.15154                         |
| 20.20408        | 60                   | 29.26396                                            | 61.55515                         |
| 20.5102         | 60                   | 30.28324                                            | 59.04629                         |
| 20.81633        | 60                   | 31.30407                                            | 56.62496                         |
| 21.12245        | 60                   | 32.32645                                            | 54.29116                         |
| 21.42857        | 60                   | 33.35039                                            | 52.04489                         |
| 21.73469        | 60                   | 34.37588                                            | 49.88615                         |
| 22.04082        | 60                   | 35.40292                                            | 47.81493                         |
| 22.34694        | 60                   | 36.43152                                            | 45.83125                         |
| 22.65306        | 60                   | 37.46166                                            | 43.93509                         |
| 22.95918        | 60                   | 38.49336                                            | 42.12647                         |
| 23.26531        | 60                   | 39.52661                                            | 40.40537                         |
| 23.57143        | 60                   | 40.56142                                            | 38.7718                          |
| 23.87755        | 60                   | 41.59778                                            | 37.22576                         |
| 24.18367        | 60                   | 42.63568                                            | 35.76726                         |
| 24.4898         | 60                   | 43.67515                                            | 34.39628                         |
| 24.79592        | 60                   | 44.71616                                            | 33.11282                         |
| 25.10204        | 60                   | 45.75873                                            | 31.9169                          |
| 25.40816        | 60                   | 46.80285                                            | 30.80851                         |
| 25.71429        | 60                   | 47.84852                                            | 29.78765                         |
| 26.02041        | 60                   | 48.89574                                            | 28.85431                         |

|          |       |          |          |
|----------|-------|----------|----------|
| 26.32653 | 60    | 49.94452 | 28.00851 |
| 26.63265 | 60    | 50.99485 | 27.25023 |
| 26.93878 | 60    | 52.04673 | 26.57948 |
| 27.2449  | 60    | 53.10016 | 25.99627 |
| 27.55102 | 60    | 54.15515 | 25.50058 |
| 27.85714 | 60    | 55.21169 | 25.09242 |
| 28.16327 | 60    | 56.26978 | 24.77179 |
| 28.46939 | 60    | 57.32942 | 24.53869 |
| 28.77551 | 60    | 58.39062 | 24.39312 |
| 29.08163 | 60    | 59.45337 | 24.33507 |
| 29.38776 | 60    | 60.51767 | 24.36456 |
| 29.69388 | 60    | 61.58352 | 24.48157 |
| 30       | 60    | 62.65093 | 24.68612 |
| 15       | 60.51 | 12.1916  | 117.6378 |
| 15.30612 | 60.51 | 13.186   | 113.6416 |
| 15.61224 | 60.51 | 14.18194 | 109.7329 |
| 15.91837 | 60.51 | 15.17944 | 105.9118 |
| 16.22449 | 60.51 | 16.17849 | 102.1782 |
| 16.53061 | 60.51 | 17.17909 | 98.53213 |
| 16.83673 | 60.51 | 18.18125 | 94.97359 |
| 17.14286 | 60.51 | 19.18495 | 91.50259 |
| 17.44898 | 60.51 | 20.19022 | 88.11911 |
| 17.7551  | 60.51 | 21.19703 | 84.82316 |
| 18.06122 | 60.51 | 22.20539 | 81.61474 |
| 18.36735 | 60.51 | 23.21531 | 78.49385 |
| 18.67347 | 60.51 | 24.22678 | 75.46049 |
| 18.97959 | 60.51 | 25.2398  | 72.51466 |
| 19.28571 | 60.51 | 26.25438 | 69.65635 |
| 19.59184 | 60.51 | 27.27051 | 66.88558 |
| 19.89796 | 60.51 | 28.28818 | 64.20233 |
| 20.20408 | 60.51 | 29.30742 | 61.60662 |
| 20.5102  | 60.51 | 30.3282  | 59.09843 |
| 20.81633 | 60.51 | 31.35054 | 56.67778 |
| 21.12245 | 60.51 | 32.37443 | 54.34465 |
| 21.42857 | 60.51 | 33.39987 | 52.09905 |
| 21.73469 | 60.51 | 34.42687 | 49.94098 |
| 22.04082 | 60.51 | 35.45541 | 47.87044 |
| 22.34694 | 60.51 | 36.48551 | 45.88743 |
| 22.65306 | 60.51 | 37.51717 | 43.99194 |
| 22.95918 | 60.51 | 38.55037 | 42.18399 |
| 23.26531 | 60.51 | 39.58513 | 40.46357 |
| 23.57143 | 60.51 | 40.62144 | 38.83067 |
| 23.87755 | 60.51 | 41.6593  | 37.28531 |

|          |       |          |          |
|----------|-------|----------|----------|
| 24.18367 | 60.51 | 42.69871 | 35.82747 |
| 24.4898  | 60.51 | 43.73968 | 34.45716 |
| 24.79592 | 60.51 | 44.7822  | 33.17439 |
| 25.10204 | 60.51 | 45.82627 | 31.97914 |
| 25.40816 | 60.51 | 46.8719  | 30.87142 |
| 25.71429 | 60.51 | 47.91907 | 29.85123 |
| 26.02041 | 60.51 | 48.9678  | 28.91856 |
| 26.32653 | 60.51 | 50.01809 | 28.07343 |
| 26.63265 | 60.51 | 51.06992 | 27.31583 |
| 26.93878 | 60.51 | 52.12331 | 26.64575 |
| 27.2449  | 60.51 | 53.17825 | 26.06321 |
| 27.55102 | 60.51 | 54.23474 | 25.56819 |
| 27.85714 | 60.51 | 55.29278 | 25.16071 |
| 28.16327 | 60.51 | 56.35238 | 24.84075 |
| 28.46939 | 60.51 | 57.41353 | 24.60832 |
| 28.77551 | 60.51 | 58.47623 | 24.46342 |
| 29.08163 | 60.51 | 59.54048 | 24.40605 |
| 29.38776 | 60.51 | 60.60629 | 24.43621 |
| 29.69388 | 60.51 | 61.67365 | 24.5539  |
| 30       | 60.51 | 62.74256 | 24.75912 |
| 15       | 61.02 | 12.20806 | 117.6759 |
| 15.30612 | 61.02 | 13.20395 | 113.6804 |
| 15.61224 | 61.02 | 14.2014  | 109.7724 |
| 15.91837 | 61.02 | 15.20041 | 105.952  |
| 16.22449 | 61.02 | 16.20096 | 102.219  |
| 16.53061 | 61.02 | 17.20307 | 98.57363 |
| 16.83673 | 61.02 | 18.20673 | 95.01577 |
| 17.14286 | 61.02 | 19.21194 | 91.54544 |
| 17.44898 | 61.02 | 20.21871 | 88.16263 |
| 17.7551  | 61.02 | 21.22703 | 84.86735 |
| 18.06122 | 61.02 | 22.2369  | 81.65961 |
| 18.36735 | 61.02 | 23.24832 | 78.53939 |
| 18.67347 | 61.02 | 24.2613  | 75.5067  |
| 18.97959 | 61.02 | 25.27583 | 72.56154 |
| 19.28571 | 61.02 | 26.29191 | 69.70391 |
| 19.59184 | 61.02 | 27.30954 | 66.93381 |
| 19.89796 | 61.02 | 28.32872 | 64.25124 |
| 20.20408 | 61.02 | 29.34946 | 61.6562  |
| 20.5102  | 61.02 | 30.37175 | 59.14868 |
| 20.81633 | 61.02 | 31.39559 | 56.7287  |
| 21.12245 | 61.02 | 32.42099 | 54.39624 |
| 21.42857 | 61.02 | 33.44794 | 52.15132 |
| 21.73469 | 61.02 | 34.47644 | 49.99392 |

|          |        |          |          |
|----------|--------|----------|----------|
| 22.04082 | 61.02  | 35.50649 | 47.92405 |
| 22.34694 | 61.02  | 36.5381  | 45.94171 |
| 22.65306 | 61.02  | 37.57125 | 44.0469  |
| 22.95918 | 61.02  | 38.60596 | 42.23962 |
| 23.26531 | 61.02  | 39.64223 | 40.51987 |
| 23.57143 | 61.02  | 40.68004 | 38.88765 |
| 23.87755 | 61.02  | 41.71941 | 37.34296 |
| 24.18367 | 61.02  | 42.76033 | 35.88579 |
| 24.4898  | 61.02  | 43.8028  | 34.51616 |
| 24.79592 | 61.02  | 44.84683 | 33.23405 |
| 25.10204 | 61.02  | 45.8924  | 32.03948 |
| 25.40816 | 61.02  | 46.93953 | 30.93243 |
| 25.71429 | 61.02  | 47.98822 | 29.91291 |
| 26.02041 | 61.02  | 49.03845 | 28.98092 |
| 26.32653 | 61.02  | 50.09024 | 28.13646 |
| 26.63265 | 61.02  | 51.14358 | 27.37953 |
| 26.93878 | 61.02  | 52.19847 | 26.71013 |
| 27.2449  | 61.02  | 53.25491 | 26.12826 |
| 27.55102 | 61.02  | 54.31291 | 25.63392 |
| 27.85714 | 61.02  | 55.37246 | 25.2271  |
| 28.16327 | 61.02  | 56.43356 | 24.90782 |
| 28.46939 | 61.02  | 57.49622 | 24.67606 |
| 28.77551 | 61.02  | 58.56043 | 24.53184 |
| 29.08163 | 61.02  | 59.62619 | 24.47514 |
| 29.38776 | 61.02  | 60.6935  | 24.50597 |
| 29.69388 | 61.02  | 61.76236 | 24.62433 |
| 30       | 61.02  | 62.83278 | 24.83022 |
| 15       | 61.531 | 12.22309 | 117.7121 |
| 15.30612 | 61.531 | 13.2205  | 113.7173 |
| 15.61224 | 61.531 | 14.21945 | 109.81   |
| 15.91837 | 61.531 | 15.21996 | 105.9902 |
| 16.22449 | 61.531 | 16.22202 | 102.258  |
| 16.53061 | 61.531 | 17.22564 | 98.61324 |
| 16.83673 | 61.531 | 18.2308  | 95.05605 |
| 17.14286 | 61.531 | 19.23752 | 91.58639 |
| 17.44898 | 61.531 | 20.24579 | 88.20426 |
| 17.7551  | 61.531 | 21.25561 | 84.90966 |
| 18.06122 | 61.531 | 22.26699 | 81.70258 |
| 18.36735 | 61.531 | 23.27992 | 78.58304 |
| 18.67347 | 61.531 | 24.2944  | 75.55102 |
| 18.97959 | 61.531 | 25.31043 | 72.60654 |
| 19.28571 | 61.531 | 26.32802 | 69.74958 |
| 19.59184 | 61.531 | 27.34716 | 66.98015 |

|          |        |          |          |
|----------|--------|----------|----------|
| 19.89796 | 61.531 | 28.36785 | 64.29825 |
| 20.20408 | 61.531 | 29.39009 | 61.70388 |
| 20.5102  | 61.531 | 30.41389 | 59.19704 |
| 20.81633 | 61.531 | 31.43923 | 56.77773 |
| 21.12245 | 61.531 | 32.46613 | 54.44595 |
| 21.42857 | 61.531 | 33.49459 | 52.20169 |
| 21.73469 | 61.531 | 34.52459 | 50.04497 |
| 22.04082 | 61.531 | 35.55615 | 47.97577 |
| 22.34694 | 61.531 | 36.58926 | 45.99411 |
| 22.65306 | 61.531 | 37.62392 | 44.09997 |
| 22.95918 | 61.531 | 38.66014 | 42.29336 |
| 23.26531 | 61.531 | 39.69791 | 40.57429 |
| 23.57143 | 61.531 | 40.73723 | 38.94274 |
| 23.87755 | 61.531 | 41.7781  | 37.39872 |
| 24.18367 | 61.531 | 42.82053 | 35.94222 |
| 24.4898  | 61.531 | 43.8645  | 34.57326 |
| 24.79592 | 61.531 | 44.91004 | 33.29183 |
| 25.10204 | 61.531 | 45.95712 | 32.09793 |
| 25.40816 | 61.531 | 47.00575 | 30.99155 |
| 25.71429 | 61.531 | 48.05594 | 29.97271 |
| 26.02041 | 61.531 | 49.10768 | 29.04139 |
| 26.32653 | 61.531 | 50.16097 | 28.1976  |
| 26.63265 | 61.531 | 51.21582 | 27.44135 |
| 26.93878 | 61.531 | 52.27222 | 26.77262 |
| 27.2449  | 61.531 | 53.33017 | 26.19142 |
| 27.55102 | 61.531 | 54.38967 | 25.69775 |
| 27.85714 | 61.531 | 55.45072 | 25.29161 |
| 28.16327 | 61.531 | 56.51333 | 24.973   |
| 28.46939 | 61.531 | 57.57749 | 24.74191 |
| 28.77551 | 61.531 | 58.64321 | 24.59836 |
| 29.08163 | 61.531 | 59.71047 | 24.54234 |
| 29.38776 | 61.531 | 60.77929 | 24.57384 |
| 29.69388 | 61.531 | 61.84966 | 24.69287 |
| 30       | 61.531 | 62.92158 | 24.89944 |
| 15       | 62.041 | 12.23671 | 117.7465 |
| 15.30612 | 62.041 | 13.23562 | 113.7523 |
| 15.61224 | 62.041 | 14.23608 | 109.8457 |
| 15.91837 | 62.041 | 15.2381  | 106.0266 |
| 16.22449 | 62.041 | 16.24166 | 102.295  |
| 16.53061 | 62.041 | 17.24678 | 98.65096 |
| 16.83673 | 62.041 | 18.25346 | 95.09445 |
| 17.14286 | 62.041 | 19.26168 | 91.62546 |
| 17.44898 | 62.041 | 20.27146 | 88.244   |

|          |        |          |          |
|----------|--------|----------|----------|
| 17.7551  | 62.041 | 21.28278 | 84.95007 |
| 18.06122 | 62.041 | 22.29567 | 81.74367 |
| 18.36735 | 62.041 | 23.3101  | 78.62479 |
| 18.67347 | 62.041 | 24.32609 | 75.59345 |
| 18.97959 | 62.041 | 25.34362 | 72.64964 |
| 19.28571 | 62.041 | 26.36271 | 69.79335 |
| 19.59184 | 62.041 | 27.38336 | 67.0246  |
| 19.89796 | 62.041 | 28.40555 | 64.34337 |
| 20.20408 | 62.041 | 29.4293  | 61.74967 |
| 20.5102  | 62.041 | 30.4546  | 59.24351 |
| 20.81633 | 62.041 | 31.48146 | 56.82487 |
| 21.12245 | 62.041 | 32.50986 | 54.49376 |
| 21.42857 | 62.041 | 33.53982 | 52.25018 |
| 21.73469 | 62.041 | 34.57133 | 50.09413 |
| 22.04082 | 62.041 | 35.6044  | 48.0256  |
| 22.34694 | 62.041 | 36.63901 | 46.04461 |
| 22.65306 | 62.041 | 37.67518 | 44.15115 |
| 22.95918 | 62.041 | 38.7129  | 42.34521 |
| 23.26531 | 62.041 | 39.75218 | 40.62681 |
| 23.57143 | 62.041 | 40.793   | 38.99593 |
| 23.87755 | 62.041 | 41.83538 | 37.45258 |
| 24.18367 | 62.041 | 42.87931 | 35.99676 |
| 24.4898  | 62.041 | 43.92479 | 34.62847 |
| 24.79592 | 62.041 | 44.97183 | 33.34771 |
| 25.10204 | 62.041 | 46.02042 | 32.15448 |
| 25.40816 | 62.041 | 47.07056 | 31.04878 |
| 25.71429 | 62.041 | 48.12225 | 30.03061 |
| 26.02041 | 62.041 | 49.1755  | 29.09997 |
| 26.32653 | 62.041 | 50.2303  | 28.25685 |
| 26.63265 | 62.041 | 51.28665 | 27.50127 |
| 26.93878 | 62.041 | 52.34455 | 26.83321 |
| 27.2449  | 62.041 | 53.404   | 26.25269 |
| 27.55102 | 62.041 | 54.46501 | 25.75969 |
| 27.85714 | 62.041 | 55.52757 | 25.35422 |
| 28.16327 | 62.041 | 56.59169 | 25.03628 |
| 28.46939 | 62.041 | 57.65735 | 24.80587 |
| 28.77551 | 62.041 | 58.72457 | 24.66299 |
| 29.08163 | 62.041 | 59.79334 | 24.60764 |
| 29.38776 | 62.041 | 60.86366 | 24.63982 |
| 29.69388 | 62.041 | 61.93554 | 24.75952 |
| 30       | 62.041 | 63.00897 | 24.96676 |
| 15       | 62.551 | 12.24892 | 117.779  |
| 15.30612 | 62.551 | 13.24933 | 113.7855 |

|          |        |          |          |
|----------|--------|----------|----------|
| 15.61224 | 62.551 | 14.2513  | 109.8795 |
| 15.91837 | 62.551 | 15.25482 | 106.0611 |
| 16.22449 | 62.551 | 16.25989 | 102.3302 |
| 16.53061 | 62.551 | 17.26652 | 98.68679 |
| 16.83673 | 62.551 | 18.27469 | 95.13095 |
| 17.14286 | 62.551 | 19.28442 | 91.66263 |
| 17.44898 | 62.551 | 20.2957  | 88.28184 |
| 17.7551  | 62.551 | 21.30854 | 84.98859 |
| 18.06122 | 62.551 | 22.32293 | 81.78286 |
| 18.36735 | 62.551 | 23.33886 | 78.66466 |
| 18.67347 | 62.551 | 24.35636 | 75.63399 |
| 18.97959 | 62.551 | 25.3754  | 72.69085 |
| 19.28571 | 62.551 | 26.396   | 69.83523 |
| 19.59184 | 62.551 | 27.41815 | 67.06715 |
| 19.89796 | 62.551 | 28.44185 | 64.3866  |
| 20.20408 | 62.551 | 29.4671  | 61.79357 |
| 20.5102  | 62.551 | 30.49391 | 59.28808 |
| 20.81633 | 62.551 | 31.52227 | 56.87011 |
| 21.12245 | 62.551 | 32.55218 | 54.53968 |
| 21.42857 | 62.551 | 33.58364 | 52.29677 |
| 21.73469 | 62.551 | 34.61666 | 50.14139 |
| 22.04082 | 62.551 | 35.65123 | 48.07354 |
| 22.34694 | 62.551 | 36.68735 | 46.09322 |
| 22.65306 | 62.551 | 37.72502 | 44.20043 |
| 22.95918 | 62.551 | 38.76425 | 42.39517 |
| 23.26531 | 62.551 | 39.80503 | 40.67743 |
| 23.57143 | 62.551 | 40.84736 | 39.04723 |
| 23.87755 | 62.551 | 41.89124 | 37.50455 |
| 24.18367 | 62.551 | 42.93668 | 36.04941 |
| 24.4898  | 62.551 | 43.98367 | 34.68179 |
| 24.79592 | 62.551 | 45.03221 | 33.40171 |
| 25.10204 | 62.551 | 46.0823  | 32.20915 |
| 25.40816 | 62.551 | 47.13395 | 31.10412 |
| 25.71429 | 62.551 | 48.18715 | 30.08662 |
| 26.02041 | 62.551 | 49.2419  | 29.15665 |
| 26.32653 | 62.551 | 50.2982  | 28.31421 |
| 26.63265 | 62.551 | 51.35606 | 27.5593  |
| 26.93878 | 62.551 | 52.41547 | 26.89191 |
| 27.2449  | 62.551 | 53.47643 | 26.31206 |
| 27.55102 | 62.551 | 54.53894 | 25.81973 |
| 27.85714 | 62.551 | 55.60301 | 25.41494 |
| 28.16327 | 62.551 | 56.66862 | 25.09767 |
| 28.46939 | 62.551 | 57.73579 | 24.86793 |

|          |        |          |          |
|----------|--------|----------|----------|
| 28.77551 | 62.551 | 58.80452 | 24.72573 |
| 29.08163 | 62.551 | 59.87479 | 24.67105 |
| 29.38776 | 62.551 | 60.94662 | 24.7039  |
| 29.69388 | 62.551 | 62.02    | 24.82428 |
| 30       | 62.551 | 63.09494 | 25.03219 |
| 15       | 63.061 | 12.25971 | 117.8095 |
| 15.30612 | 63.061 | 13.26163 | 113.8167 |
| 15.61224 | 63.061 | 14.2651  | 109.9114 |
| 15.91837 | 63.061 | 15.27013 | 106.0937 |
| 16.22449 | 63.061 | 16.2767  | 102.3634 |
| 16.53061 | 63.061 | 17.28483 | 98.72073 |
| 16.83673 | 63.061 | 18.29452 | 95.16555 |
| 17.14286 | 63.061 | 19.30575 | 91.69791 |
| 17.44898 | 63.061 | 20.31854 | 88.3178  |
| 17.7551  | 63.061 | 21.33288 | 85.02521 |
| 18.06122 | 63.061 | 22.34877 | 81.82016 |
| 18.36735 | 63.061 | 23.36621 | 78.70263 |
| 18.67347 | 63.061 | 24.38521 | 75.67263 |
| 18.97959 | 63.061 | 25.40576 | 72.73016 |
| 19.28571 | 63.061 | 26.42786 | 69.87522 |
| 19.59184 | 63.061 | 27.45152 | 67.10781 |
| 19.89796 | 63.061 | 28.47672 | 64.42793 |
| 20.20408 | 63.061 | 29.50348 | 61.83558 |
| 20.5102  | 63.061 | 30.5318  | 59.33076 |
| 20.81633 | 63.061 | 31.56166 | 56.91347 |
| 21.12245 | 63.061 | 32.59308 | 54.5837  |
| 21.42857 | 63.061 | 33.62605 | 52.34147 |
| 21.73469 | 63.061 | 34.66057 | 50.18676 |
| 22.04082 | 63.061 | 35.69664 | 48.11958 |
| 22.34694 | 63.061 | 36.73427 | 46.13994 |
| 22.65306 | 63.061 | 37.77345 | 44.24782 |
| 22.95918 | 63.061 | 38.81418 | 42.44323 |
| 23.26531 | 63.061 | 39.85646 | 40.72617 |
| 23.57143 | 63.061 | 40.9003  | 39.09664 |
| 23.87755 | 63.061 | 41.94569 | 37.55464 |
| 24.18367 | 63.061 | 42.99263 | 36.10016 |
| 24.4898  | 63.061 | 44.04112 | 34.73322 |
| 24.79592 | 63.061 | 45.09117 | 33.4538  |
| 25.10204 | 63.061 | 46.14277 | 32.26192 |
| 25.40816 | 63.061 | 47.19592 | 31.15756 |
| 25.71429 | 63.061 | 48.25063 | 30.14074 |
| 26.02041 | 63.061 | 49.30688 | 29.21144 |
| 26.32653 | 63.061 | 50.36469 | 28.36967 |



|          |        |          |          |
|----------|--------|----------|----------|
| 26.63265 | 63.061 | 51.42405 | 27.61543 |
| 26.93878 | 63.061 | 52.48497 | 26.94872 |
| 27.2449  | 63.061 | 53.54743 | 26.36954 |
| 27.55102 | 63.061 | 54.61145 | 25.87789 |
| 27.85714 | 63.061 | 55.67702 | 25.47377 |
| 28.16327 | 63.061 | 56.74415 | 25.15717 |
| 28.46939 | 63.061 | 57.81282 | 24.92811 |
| 28.77551 | 63.061 | 58.88305 | 24.78657 |
| 29.08163 | 63.061 | 59.95483 | 24.73257 |
| 29.38776 | 63.061 | 61.02817 | 24.76609 |
| 29.69388 | 63.061 | 62.10305 | 24.88714 |
| 30       | 63.061 | 63.17949 | 25.09572 |
| 15       | 63.571 | 12.26909 | 117.8382 |
| 15.30612 | 63.571 | 13.27251 | 113.8461 |
| 15.61224 | 63.571 | 14.27749 | 109.9414 |
| 15.91837 | 63.571 | 15.28402 | 106.1244 |
| 16.22449 | 63.571 | 16.2921  | 102.3948 |
| 16.53061 | 63.571 | 17.30174 | 98.75277 |
| 16.83673 | 63.571 | 18.31292 | 95.19827 |
| 17.14286 | 63.571 | 19.32566 | 91.7313  |
| 17.44898 | 63.571 | 20.33996 | 88.35186 |
| 17.7551  | 63.571 | 21.3558  | 85.05994 |
| 18.06122 | 63.571 | 22.3732  | 81.85556 |
| 18.36735 | 63.571 | 23.39215 | 78.73871 |
| 18.67347 | 63.571 | 24.41265 | 75.70938 |
| 18.97959 | 63.571 | 25.43471 | 72.76759 |
| 19.28571 | 63.571 | 26.45831 | 69.91332 |
| 19.59184 | 63.571 | 27.48347 | 67.14658 |
| 19.89796 | 63.571 | 28.51019 | 64.46738 |
| 20.20408 | 63.571 | 29.53845 | 61.8757  |
| 20.5102  | 63.571 | 30.56827 | 59.37155 |
| 20.81633 | 63.571 | 31.59964 | 56.95493 |
| 21.12245 | 63.571 | 32.63256 | 54.62583 |
| 21.42857 | 63.571 | 33.66703 | 52.38427 |
| 21.73469 | 63.571 | 34.70306 | 50.23024 |
| 22.04082 | 63.571 | 35.74064 | 48.16374 |
| 22.34694 | 63.571 | 36.77977 | 46.18476 |
| 22.65306 | 63.571 | 37.82046 | 44.29331 |
| 22.95918 | 63.571 | 38.86269 | 42.4894  |
| 23.26531 | 63.571 | 39.90648 | 40.77301 |
| 23.57143 | 63.571 | 40.95183 | 39.14415 |
| 23.87755 | 63.571 | 41.99872 | 37.60282 |
| 24.18367 | 63.571 | 43.04717 | 36.14902 |

|          |        |          |          |
|----------|--------|----------|----------|
| 24.4898  | 63.571 | 44.09717 | 34.78275 |
| 24.79592 | 63.571 | 45.14872 | 33.50401 |
| 25.10204 | 63.571 | 46.20182 | 32.3128  |
| 25.40816 | 63.571 | 47.25648 | 31.20912 |
| 25.71429 | 63.571 | 48.31269 | 30.19296 |
| 26.02041 | 63.571 | 49.37045 | 29.26434 |
| 26.32653 | 63.571 | 50.42977 | 28.42324 |
| 26.63265 | 63.571 | 51.49063 | 27.66967 |
| 26.93878 | 63.571 | 52.55305 | 27.00364 |
| 27.2449  | 63.571 | 53.61702 | 26.42513 |
| 27.55102 | 63.571 | 54.68255 | 25.93415 |
| 27.85714 | 63.571 | 55.74962 | 25.5307  |
| 28.16327 | 63.571 | 56.81825 | 25.21478 |
| 28.46939 | 63.571 | 57.88844 | 24.98639 |
| 28.77551 | 63.571 | 58.96017 | 24.84552 |
| 29.08163 | 63.571 | 60.03346 | 24.79219 |
| 29.38776 | 63.571 | 61.1083  | 24.82639 |
| 29.69388 | 63.571 | 62.18469 | 24.94811 |
| 30       | 63.571 | 63.26263 | 25.15737 |
| 15       | 64.082 | 12.27705 | 117.865  |
| 15.30612 | 64.082 | 13.28198 | 113.8735 |
| 15.61224 | 64.082 | 14.28846 | 109.9696 |
| 15.91837 | 64.082 | 15.2965  | 106.1532 |
| 16.22449 | 64.082 | 16.30608 | 102.4243 |
| 16.53061 | 64.082 | 17.31722 | 98.78292 |
| 16.83673 | 64.082 | 18.32992 | 95.22909 |
| 17.14286 | 64.082 | 19.34416 | 91.76279 |
| 17.44898 | 64.082 | 20.35996 | 88.38402 |
| 17.7551  | 64.082 | 21.37731 | 85.09278 |
| 18.06122 | 64.082 | 22.39621 | 81.88907 |
| 18.36735 | 64.082 | 23.41667 | 78.77289 |
| 18.67347 | 64.082 | 24.43868 | 75.74424 |
| 18.97959 | 64.082 | 25.46224 | 72.80312 |
| 19.28571 | 64.082 | 26.48735 | 69.94952 |
| 19.59184 | 64.082 | 27.51401 | 67.18346 |
| 19.89796 | 64.082 | 28.54223 | 64.50493 |
| 20.20408 | 64.082 | 29.572   | 61.91392 |
| 20.5102  | 64.082 | 30.60332 | 59.41044 |
| 20.81633 | 64.082 | 31.6362  | 56.99449 |
| 21.12245 | 64.082 | 32.67063 | 54.66608 |
| 21.42857 | 64.082 | 33.70661 | 52.42519 |
| 21.73469 | 64.082 | 34.74414 | 50.27183 |
| 22.04082 | 64.082 | 35.78323 | 48.20599 |

|          |        |          |          |
|----------|--------|----------|----------|
| 22.34694 | 64.082 | 36.82386 | 46.22769 |
| 22.65306 | 64.082 | 37.86605 | 44.33692 |
| 22.95918 | 64.082 | 38.90979 | 42.53368 |
| 23.26531 | 64.082 | 39.95509 | 40.81796 |
| 23.57143 | 64.082 | 41.00194 | 39.18978 |
| 23.87755 | 64.082 | 42.05034 | 37.64912 |
| 24.18367 | 64.082 | 43.10029 | 36.19599 |
| 24.4898  | 64.082 | 44.15179 | 34.83039 |
| 24.79592 | 64.082 | 45.20485 | 33.55233 |
| 25.10204 | 64.082 | 46.25946 | 32.36179 |
| 25.40816 | 64.082 | 47.31562 | 31.25878 |
| 25.71429 | 64.082 | 48.37334 | 30.24329 |
| 26.02041 | 64.082 | 49.43261 | 29.31534 |
| 26.32653 | 64.082 | 50.49343 | 28.47492 |
| 26.63265 | 64.082 | 51.5558  | 27.72203 |
| 26.93878 | 64.082 | 52.61972 | 27.05666 |
| 27.2449  | 64.082 | 53.6852  | 26.47882 |
| 27.55102 | 64.082 | 54.75223 | 25.98852 |
| 27.85714 | 64.082 | 55.82081 | 25.58574 |
| 28.16327 | 64.082 | 56.89095 | 25.27049 |
| 28.46939 | 64.082 | 57.96263 | 25.04277 |
| 28.77551 | 64.082 | 59.03587 | 24.90258 |
| 29.08163 | 64.082 | 60.11066 | 24.84992 |
| 29.38776 | 64.082 | 61.18701 | 24.88479 |
| 29.69388 | 64.082 | 62.26491 | 25.00719 |
| 30       | 64.082 | 63.34436 | 25.21712 |
| 15       | 64.592 | 12.28359 | 117.8899 |
| 15.30612 | 64.592 | 13.29003 | 113.8991 |
| 15.61224 | 64.592 | 14.29802 | 109.9958 |
| 15.91837 | 64.592 | 15.30756 | 106.1801 |
| 16.22449 | 64.592 | 16.31865 | 102.4519 |
| 16.53061 | 64.592 | 17.3313  | 98.81117 |
| 16.83673 | 64.592 | 18.34549 | 95.25802 |
| 17.14286 | 64.592 | 19.36124 | 91.7924  |
| 17.44898 | 64.592 | 20.37855 | 88.4143  |
| 17.7551  | 64.592 | 21.3974  | 85.12373 |
| 18.06122 | 64.592 | 22.41781 | 81.9207  |
| 18.36735 | 64.592 | 23.43977 | 78.80519 |
| 18.67347 | 64.592 | 24.46329 | 75.77721 |
| 18.97959 | 64.592 | 25.48835 | 72.83676 |
| 19.28571 | 64.592 | 26.51497 | 69.98384 |
| 19.59184 | 64.592 | 27.54314 | 67.21845 |
| 19.89796 | 64.592 | 28.57286 | 64.54058 |

|          |        |          |          |
|----------|--------|----------|----------|
| 20.20408 | 64.592 | 29.60414 | 61.95025 |
| 20.5102  | 64.592 | 30.63697 | 59.44745 |
| 20.81633 | 64.592 | 31.67135 | 57.03217 |
| 21.12245 | 64.592 | 32.70728 | 54.70442 |
| 21.42857 | 64.592 | 33.74477 | 52.46421 |
| 21.73469 | 64.592 | 34.7838  | 50.31152 |
| 22.04082 | 64.592 | 35.82439 | 48.24636 |
| 22.34694 | 64.592 | 36.86654 | 46.26873 |
| 22.65306 | 64.592 | 37.91023 | 44.37863 |
| 22.95918 | 64.592 | 38.95548 | 42.57606 |
| 23.26531 | 64.592 | 40.00228 | 40.86102 |
| 23.57143 | 64.592 | 41.05063 | 39.23351 |
| 23.87755 | 64.592 | 42.10054 | 37.69352 |
| 24.18367 | 64.592 | 43.152   | 36.24107 |
| 24.4898  | 64.592 | 44.20501 | 34.87614 |
| 24.79592 | 64.592 | 45.25957 | 33.59875 |
| 25.10204 | 64.592 | 46.31568 | 32.40888 |
| 25.40816 | 64.592 | 47.37335 | 31.30654 |
| 25.71429 | 64.592 | 48.43257 | 30.29173 |
| 26.02041 | 64.592 | 49.49334 | 29.36445 |
| 26.32653 | 64.592 | 50.55567 | 28.5247  |
| 26.63265 | 64.592 | 51.61955 | 27.77248 |
| 26.93878 | 64.592 | 52.68498 | 27.10779 |
| 27.2449  | 64.592 | 53.75196 | 26.53063 |
| 27.55102 | 64.592 | 54.82049 | 26.04099 |
| 27.85714 | 64.592 | 55.89058 | 25.63889 |
| 28.16327 | 64.592 | 56.96222 | 25.32432 |
| 28.46939 | 64.592 | 58.03541 | 25.09727 |
| 28.77551 | 64.592 | 59.11016 | 24.95775 |
| 29.08163 | 64.592 | 60.18646 | 24.90576 |
| 29.38776 | 64.592 | 61.26431 | 24.94131 |
| 29.69388 | 64.592 | 62.34371 | 25.06438 |
| 30       | 64.592 | 63.42466 | 25.27498 |
| 15       | 65.102 | 12.28872 | 117.9129 |
| 15.30612 | 65.102 | 13.29666 | 113.9228 |
| 15.61224 | 65.102 | 14.30616 | 110.0202 |
| 15.91837 | 65.102 | 15.3172  | 106.2051 |
| 16.22449 | 65.102 | 16.3298  | 102.4776 |
| 16.53061 | 65.102 | 17.34395 | 98.83754 |
| 16.83673 | 65.102 | 18.35966 | 95.28506 |
| 17.14286 | 65.102 | 19.37691 | 91.82011 |
| 17.44898 | 65.102 | 20.39572 | 88.44268 |
| 17.7551  | 65.102 | 21.41608 | 85.15279 |

|          |        |          |          |
|----------|--------|----------|----------|
| 18.06122 | 65.102 | 22.43799 | 81.95042 |
| 18.36735 | 65.102 | 23.46146 | 78.83559 |
| 18.67347 | 65.102 | 24.48648 | 75.80828 |
| 18.97959 | 65.102 | 25.51305 | 72.8685  |
| 19.28571 | 65.102 | 26.54117 | 70.01626 |
| 19.59184 | 65.102 | 27.57085 | 67.25154 |
| 19.89796 | 65.102 | 28.60208 | 64.57435 |
| 20.20408 | 65.102 | 29.63486 | 61.98469 |
| 20.5102  | 65.102 | 30.66919 | 59.48256 |
| 20.81633 | 65.102 | 31.70508 | 57.06795 |
| 21.12245 | 65.102 | 32.74252 | 54.74088 |
| 21.42857 | 65.102 | 33.78151 | 52.50134 |
| 21.73469 | 65.102 | 34.82205 | 50.34932 |
| 22.04082 | 65.102 | 35.86415 | 48.28484 |
| 22.34694 | 65.102 | 36.9078  | 46.30788 |
| 22.65306 | 65.102 | 37.953   | 44.41845 |
| 22.95918 | 65.102 | 38.99975 | 42.61655 |
| 23.26531 | 65.102 | 40.04805 | 40.90218 |
| 23.57143 | 65.102 | 41.09791 | 39.27534 |
| 23.87755 | 65.102 | 42.14932 | 37.73603 |
| 24.18367 | 65.102 | 43.20229 | 36.28425 |
| 24.4898  | 65.102 | 44.2568  | 34.92    |
| 24.79592 | 65.102 | 45.31287 | 33.64328 |
| 25.10204 | 65.102 | 46.37049 | 32.45408 |
| 25.40816 | 65.102 | 47.42966 | 31.35242 |
| 25.71429 | 65.102 | 48.49039 | 30.33828 |
| 26.02041 | 65.102 | 49.55267 | 29.41168 |
| 26.32653 | 65.102 | 50.6165  | 28.5726  |
| 26.63265 | 65.102 | 51.68188 | 27.82105 |
| 26.93878 | 65.102 | 52.74882 | 27.15703 |
| 27.2449  | 65.102 | 53.8173  | 26.58054 |
| 27.55102 | 65.102 | 54.88735 | 26.09158 |
| 27.85714 | 65.102 | 55.95894 | 25.69015 |
| 28.16327 | 65.102 | 57.03208 | 25.37624 |
| 28.46939 | 65.102 | 58.10678 | 25.14987 |
| 28.77551 | 65.102 | 59.18303 | 25.01103 |
| 29.08163 | 65.102 | 60.26083 | 24.95971 |
| 29.38776 | 65.102 | 61.34019 | 24.99593 |
| 29.69388 | 65.102 | 62.4211  | 25.11967 |
| 30       | 65.102 | 63.50356 | 25.33094 |
| 15       | 65.612 | 12.29243 | 117.934  |
| 15.30612 | 65.612 | 13.30188 | 113.9445 |
| 15.61224 | 65.612 | 14.31288 | 110.0426 |

|          |        |          |          |
|----------|--------|----------|----------|
| 15.91837 | 65.612 | 15.32543 | 106.2282 |
| 16.22449 | 65.612 | 16.33954 | 102.5014 |
| 16.53061 | 65.612 | 17.35519 | 98.86201 |
| 16.83673 | 65.612 | 18.3724  | 95.3102  |
| 17.14286 | 65.612 | 19.39116 | 91.84592 |
| 17.44898 | 65.612 | 20.41148 | 88.46917 |
| 17.7551  | 65.612 | 21.43334 | 85.17995 |
| 18.06122 | 65.612 | 22.45676 | 81.97826 |
| 18.36735 | 65.612 | 23.48173 | 78.8641  |
| 18.67347 | 65.612 | 24.50826 | 75.83746 |
| 18.97959 | 65.612 | 25.53633 | 72.89836 |
| 19.28571 | 65.612 | 26.56596 | 70.04678 |
| 19.59184 | 65.612 | 27.59714 | 67.28274 |
| 19.89796 | 65.612 | 28.62988 | 64.60622 |
| 20.20408 | 65.612 | 29.66416 | 62.01723 |
| 20.5102  | 65.612 | 30.7     | 59.51577 |
| 20.81633 | 65.612 | 31.73739 | 57.10184 |
| 21.12245 | 65.612 | 32.77634 | 54.77544 |
| 21.42857 | 65.612 | 33.81683 | 52.53657 |
| 21.73469 | 65.612 | 34.85888 | 50.38523 |
| 22.04082 | 65.612 | 35.90248 | 48.32142 |
| 22.34694 | 65.612 | 36.94764 | 46.34513 |
| 22.65306 | 65.612 | 37.99434 | 44.45638 |
| 22.95918 | 65.612 | 39.0426  | 42.65515 |
| 23.26531 | 65.612 | 40.09241 | 40.94146 |
| 23.57143 | 65.612 | 41.14378 | 39.31529 |
| 23.87755 | 65.612 | 42.19669 | 37.77665 |
| 24.18367 | 65.612 | 43.25116 | 36.32554 |
| 24.4898  | 65.612 | 44.30718 | 34.96196 |
| 24.79592 | 65.612 | 45.36476 | 33.68591 |
| 25.10204 | 65.612 | 46.42388 | 32.49739 |
| 25.40816 | 65.612 | 47.48456 | 31.3964  |
| 25.71429 | 65.612 | 48.54679 | 30.38294 |
| 26.02041 | 65.612 | 49.61058 | 29.457   |
| 26.32653 | 65.612 | 50.67591 | 28.6186  |
| 26.63265 | 65.612 | 51.7428  | 27.86772 |
| 26.93878 | 65.612 | 52.81124 | 27.20438 |
| 27.2449  | 65.612 | 53.88123 | 26.62856 |
| 27.55102 | 65.612 | 54.95278 | 26.14027 |
| 27.85714 | 65.612 | 56.02588 | 25.73951 |
| 28.16327 | 65.612 | 57.10053 | 25.42628 |
| 28.46939 | 65.612 | 58.17673 | 25.20058 |
| 28.77551 | 65.612 | 59.25449 | 25.06241 |

|          |        |          |          |
|----------|--------|----------|----------|
| 29.08163 | 65.612 | 60.3338  | 25.01177 |
| 29.38776 | 65.612 | 61.41466 | 25.04865 |
| 29.69388 | 65.612 | 62.49707 | 25.17307 |
| 30       | 65.612 | 63.58104 | 25.38502 |
| 15       | 66.122 | 12.29473 | 117.9532 |
| 15.30612 | 66.122 | 13.30568 | 113.9644 |
| 15.61224 | 66.122 | 14.31819 | 110.0632 |
| 15.91837 | 66.122 | 15.33225 | 106.2495 |
| 16.22449 | 66.122 | 16.34786 | 102.5233 |
| 16.53061 | 66.122 | 17.36502 | 98.88459 |
| 16.83673 | 66.122 | 18.38373 | 95.33345 |
| 17.14286 | 66.122 | 19.404   | 91.86985 |
| 17.44898 | 66.122 | 20.42582 | 88.49377 |
| 17.7551  | 66.122 | 21.44919 | 85.20522 |
| 18.06122 | 66.122 | 22.47412 | 82.0042  |
| 18.36735 | 66.122 | 23.50059 | 78.89071 |
| 18.67347 | 66.122 | 24.52862 | 75.86475 |
| 18.97959 | 66.122 | 25.5582  | 72.92632 |
| 19.28571 | 66.122 | 26.58934 | 70.07542 |
| 19.59184 | 66.122 | 27.62202 | 67.31204 |
| 19.89796 | 66.122 | 28.65626 | 64.6362  |
| 20.20408 | 66.122 | 29.69205 | 62.04789 |
| 20.5102  | 66.122 | 30.7294  | 59.5471  |
| 20.81633 | 66.122 | 31.7683  | 57.13384 |
| 21.12245 | 66.122 | 32.80874 | 54.80812 |
| 21.42857 | 66.122 | 33.85075 | 52.56992 |
| 21.73469 | 66.122 | 34.8943  | 50.41925 |
| 22.04082 | 66.122 | 35.93941 | 48.35611 |
| 22.34694 | 66.122 | 36.98607 | 46.3805  |
| 22.65306 | 66.122 | 38.03428 | 44.49241 |
| 22.95918 | 66.122 | 39.08404 | 42.69186 |
| 23.26531 | 66.122 | 40.13536 | 40.97884 |
| 23.57143 | 66.122 | 41.18823 | 39.35334 |
| 23.87755 | 66.122 | 42.24265 | 37.81538 |
| 24.18367 | 66.122 | 43.29862 | 36.36494 |
| 24.4898  | 66.122 | 44.35615 | 35.00204 |
| 24.79592 | 66.122 | 45.41523 | 33.72666 |
| 25.10204 | 66.122 | 46.47586 | 32.53881 |
| 25.40816 | 66.122 | 47.53804 | 31.43849 |
| 25.71429 | 66.122 | 48.60178 | 30.4257  |
| 26.02041 | 66.122 | 49.66707 | 29.50044 |
| 26.32653 | 66.122 | 50.73391 | 28.66271 |
| 26.63265 | 66.122 | 51.8023  | 27.9125  |

|          |        |          |          |
|----------|--------|----------|----------|
| 26.93878 | 66.122 | 52.87225 | 27.24983 |
| 27.2449  | 66.122 | 53.94375 | 26.67469 |
| 27.55102 | 66.122 | 55.0168  | 26.18707 |
| 27.85714 | 66.122 | 56.0914  | 25.78698 |
| 28.16327 | 66.122 | 57.16756 | 25.47443 |
| 28.46939 | 66.122 | 58.24527 | 25.2494  |
| 28.77551 | 66.122 | 59.32453 | 25.1119  |
| 29.08163 | 66.122 | 60.40534 | 25.06193 |
| 29.38776 | 66.122 | 61.48771 | 25.09949 |
| 29.69388 | 66.122 | 62.57163 | 25.22458 |
| 30       | 66.122 | 63.6571  | 25.4372  |
| 15       | 66.633 | 12.29562 | 117.9705 |
| 15.30612 | 66.633 | 13.30807 | 113.9824 |
| 15.61224 | 66.633 | 14.32208 | 110.0818 |
| 15.91837 | 66.633 | 15.33765 | 106.2688 |
| 16.22449 | 66.633 | 16.35476 | 102.5433 |
| 16.53061 | 66.633 | 17.37343 | 98.90528 |
| 16.83673 | 66.633 | 18.39365 | 95.35482 |
| 17.14286 | 66.633 | 19.41542 | 91.89188 |
| 17.44898 | 66.633 | 20.43874 | 88.51648 |
| 17.7551  | 66.633 | 21.46362 | 85.2286  |
| 18.06122 | 66.633 | 22.49005 | 82.02825 |
| 18.36735 | 66.633 | 23.51803 | 78.91544 |
| 18.67347 | 66.633 | 24.54757 | 75.89015 |
| 18.97959 | 66.633 | 25.57866 | 72.95239 |
| 19.28571 | 66.633 | 26.6113  | 70.10216 |
| 19.59184 | 66.633 | 27.64549 | 67.33946 |
| 19.89796 | 66.633 | 28.68123 | 64.66429 |
| 20.20408 | 66.633 | 29.71853 | 62.07665 |
| 20.5102  | 66.633 | 30.75738 | 59.57653 |
| 20.81633 | 66.633 | 31.79778 | 57.16395 |
| 21.12245 | 66.633 | 32.83974 | 54.83889 |
| 21.42857 | 66.633 | 33.88324 | 52.60137 |
| 21.73469 | 66.633 | 34.9283  | 50.45137 |
| 22.04082 | 66.633 | 35.97491 | 48.3889  |
| 22.34694 | 66.633 | 37.02308 | 46.41397 |
| 22.65306 | 66.633 | 38.0728  | 44.52656 |
| 22.95918 | 66.633 | 39.12407 | 42.72668 |
| 23.26531 | 66.633 | 40.17689 | 41.01433 |
| 23.57143 | 66.633 | 41.23126 | 39.3895  |
| 23.87755 | 66.633 | 42.28719 | 37.85221 |
| 24.18367 | 66.633 | 43.34467 | 36.40245 |
| 24.4898  | 66.633 | 44.4037  | 35.04021 |



|          |        |          |          |
|----------|--------|----------|----------|
| 24.79592 | 66.633 | 45.46428 | 33.76551 |
| 25.10204 | 66.633 | 46.52642 | 32.57833 |
| 25.40816 | 66.633 | 47.59011 | 31.47869 |
| 25.71429 | 66.633 | 48.65535 | 30.46657 |
| 26.02041 | 66.633 | 49.72215 | 29.54198 |
| 26.32653 | 66.633 | 50.79049 | 28.70492 |
| 26.63265 | 66.633 | 51.86039 | 27.95539 |
| 26.93878 | 66.633 | 52.93184 | 27.29339 |
| 27.2449  | 66.633 | 54.00485 | 26.71892 |
| 27.55102 | 66.633 | 55.0794  | 26.23198 |
| 27.85714 | 66.633 | 56.15551 | 25.83256 |
| 28.16327 | 66.633 | 57.23317 | 25.52068 |
| 28.46939 | 66.633 | 58.31239 | 25.29632 |
| 28.77551 | 66.633 | 59.39315 | 25.1595  |
| 29.08163 | 66.633 | 60.47547 | 25.1102  |
| 29.38776 | 66.633 | 61.55935 | 25.14843 |
| 29.69388 | 66.633 | 62.64477 | 25.27419 |
| 30       | 66.633 | 63.73175 | 25.48749 |
| 15       | 67.143 | 12.29508 | 117.986  |
| 15.30612 | 67.143 | 13.30905 | 113.9985 |
| 15.61224 | 67.143 | 14.32456 | 110.0986 |
| 15.91837 | 67.143 | 15.34163 | 106.2862 |
| 16.22449 | 67.143 | 16.36025 | 102.5614 |
| 16.53061 | 67.143 | 17.38042 | 98.92407 |
| 16.83673 | 67.143 | 18.40215 | 95.37428 |
| 17.14286 | 67.143 | 19.42543 | 91.91202 |
| 17.44898 | 67.143 | 20.45026 | 88.53729 |
| 17.7551  | 67.143 | 21.47664 | 85.25009 |
| 18.06122 | 67.143 | 22.50457 | 82.05041 |
| 18.36735 | 67.143 | 23.53406 | 78.93827 |
| 18.67347 | 67.143 | 24.5651  | 75.91365 |
| 18.97959 | 67.143 | 25.59769 | 72.97657 |
| 19.28571 | 67.143 | 26.63184 | 70.12701 |
| 19.59184 | 67.143 | 27.66754 | 67.36498 |
| 19.89796 | 67.143 | 28.70479 | 64.69048 |
| 20.20408 | 67.143 | 29.74359 | 62.10351 |
| 20.5102  | 67.143 | 30.78394 | 59.60407 |
| 20.81633 | 67.143 | 31.82585 | 57.19216 |
| 21.12245 | 67.143 | 32.86931 | 54.86778 |
| 21.42857 | 67.143 | 33.91432 | 52.63093 |
| 21.73469 | 67.143 | 34.96089 | 50.4816  |
| 22.04082 | 67.143 | 36.00901 | 48.41981 |
| 22.34694 | 67.143 | 37.05868 | 46.44554 |

|          |        |          |          |
|----------|--------|----------|----------|
| 22.65306 | 67.143 | 38.1099  | 44.55881 |
| 22.95918 | 67.143 | 39.16267 | 42.7596  |
| 23.26531 | 67.143 | 40.217   | 41.04792 |
| 23.57143 | 67.143 | 41.27288 | 39.42377 |
| 23.87755 | 67.143 | 42.33031 | 37.88715 |
| 24.18367 | 67.143 | 43.3893  | 36.43806 |
| 24.4898  | 67.143 | 44.44983 | 35.0765  |
| 24.79592 | 67.143 | 45.51192 | 33.80247 |
| 25.10204 | 67.143 | 46.57557 | 32.61597 |
| 25.40816 | 67.143 | 47.64076 | 31.51699 |
| 25.71429 | 67.143 | 48.70751 | 30.50555 |
| 26.02041 | 67.143 | 49.77581 | 29.58163 |
| 26.32653 | 67.143 | 50.84566 | 28.74525 |
| 26.63265 | 67.143 | 51.91706 | 27.99639 |
| 26.93878 | 67.143 | 52.99002 | 27.33506 |
| 27.2449  | 67.143 | 54.06453 | 26.76126 |
| 27.55102 | 67.143 | 55.14059 | 26.27499 |
| 27.85714 | 67.143 | 56.21821 | 25.87625 |
| 28.16327 | 67.143 | 57.29737 | 25.56504 |
| 28.46939 | 67.143 | 58.37809 | 25.34136 |
| 28.77551 | 67.143 | 59.46037 | 25.2052  |
| 29.08163 | 67.143 | 60.54419 | 25.15658 |
| 29.38776 | 67.143 | 61.62957 | 25.19548 |
| 29.69388 | 67.143 | 62.7165  | 25.32192 |
| 30       | 67.143 | 63.80498 | 25.53588 |
| 15       | 67.653 | 12.29314 | 117.9995 |
| 15.30612 | 67.653 | 13.3086  | 114.0127 |
| 15.61224 | 67.653 | 14.32562 | 110.1135 |
| 15.91837 | 67.653 | 15.3442  | 106.3018 |
| 16.22449 | 67.653 | 16.36432 | 102.5776 |
| 16.53061 | 67.653 | 17.386   | 98.94098 |
| 16.83673 | 67.653 | 18.40923 | 95.39186 |
| 17.14286 | 67.653 | 19.43402 | 91.93027 |
| 17.44898 | 67.653 | 20.46035 | 88.55621 |
| 17.7551  | 67.653 | 21.48824 | 85.26968 |
| 18.06122 | 67.653 | 22.51768 | 82.07068 |
| 18.36735 | 67.653 | 23.54867 | 78.95921 |
| 18.67347 | 67.653 | 24.58122 | 75.93527 |
| 18.97959 | 67.653 | 25.61532 | 72.99885 |
| 19.28571 | 67.653 | 26.65097 | 70.14997 |
| 19.59184 | 67.653 | 27.68817 | 67.38861 |
| 19.89796 | 67.653 | 28.72693 | 64.71479 |
| 20.20408 | 67.653 | 29.76723 | 62.12849 |

|          |        |          |          |
|----------|--------|----------|----------|
| 20.5102  | 67.653 | 30.80909 | 59.62972 |
| 20.81633 | 67.653 | 31.85251 | 57.21848 |
| 21.12245 | 67.653 | 32.89747 | 54.89477 |
| 21.42857 | 67.653 | 33.94399 | 52.65859 |
| 21.73469 | 67.653 | 34.99206 | 50.50994 |
| 22.04082 | 67.653 | 36.04168 | 48.44882 |
| 22.34694 | 67.653 | 37.09286 | 46.47523 |
| 22.65306 | 67.653 | 38.14559 | 44.58916 |
| 22.95918 | 67.653 | 39.19987 | 42.79063 |
| 23.26531 | 67.653 | 40.2557  | 41.07963 |
| 23.57143 | 67.653 | 41.31308 | 39.45615 |
| 23.87755 | 67.653 | 42.37202 | 37.9202  |
| 24.18367 | 67.653 | 43.43251 | 36.47178 |
| 24.4898  | 67.653 | 44.49455 | 35.1109  |
| 24.79592 | 67.653 | 45.55815 | 33.83754 |
| 25.10204 | 67.653 | 46.6233  | 32.65171 |
| 25.40816 | 67.653 | 47.69    | 31.5534  |
| 25.71429 | 67.653 | 48.75825 | 30.54263 |
| 26.02041 | 67.653 | 49.82805 | 29.61939 |
| 26.32653 | 67.653 | 50.89941 | 28.78368 |
| 26.63265 | 67.653 | 51.97232 | 28.03549 |
| 26.93878 | 67.653 | 53.04678 | 27.37484 |
| 27.2449  | 67.653 | 54.1228  | 26.80171 |
| 27.55102 | 67.653 | 55.20037 | 26.31611 |
| 27.85714 | 67.653 | 56.27949 | 25.91805 |
| 28.16327 | 67.653 | 57.36016 | 25.60751 |
| 28.46939 | 67.653 | 58.44238 | 25.3845  |
| 28.77551 | 67.653 | 59.52616 | 25.24902 |
| 29.08163 | 67.653 | 60.61149 | 25.20106 |
| 29.38776 | 67.653 | 61.69837 | 25.24064 |
| 29.69388 | 67.653 | 62.78681 | 25.36775 |
| 30       | 67.653 | 63.87679 | 25.58239 |
| 15       | 68.163 | 12.28977 | 118.0112 |
| 15.30612 | 68.163 | 13.30675 | 114.0251 |
| 15.61224 | 68.163 | 14.32527 | 110.1265 |
| 15.91837 | 68.163 | 15.34535 | 106.3155 |
| 16.22449 | 68.163 | 16.36698 | 102.592  |
| 16.53061 | 68.163 | 17.39017 | 98.95599 |
| 16.83673 | 68.163 | 18.4149  | 95.40754 |
| 17.14286 | 68.163 | 19.44119 | 91.94663 |
| 17.44898 | 68.163 | 20.46903 | 88.57324 |
| 17.7551  | 68.163 | 21.49842 | 85.28738 |
| 18.06122 | 68.163 | 22.52937 | 82.08905 |

|          |        |          |          |
|----------|--------|----------|----------|
| 18.36735 | 68.163 | 23.56187 | 78.97825 |
| 18.67347 | 68.163 | 24.59592 | 75.95498 |
| 18.97959 | 68.163 | 25.63152 | 73.01924 |
| 19.28571 | 68.163 | 26.66868 | 70.17103 |
| 19.59184 | 68.163 | 27.70739 | 67.41035 |
| 19.89796 | 68.163 | 28.74765 | 64.7372  |
| 20.20408 | 68.163 | 29.78946 | 62.15157 |
| 20.5102  | 68.163 | 30.83283 | 59.65348 |
| 20.81633 | 68.163 | 31.87775 | 57.24291 |
| 21.12245 | 68.163 | 32.92422 | 54.91988 |
| 21.42857 | 68.163 | 33.97224 | 52.68437 |
| 21.73469 | 68.163 | 35.02182 | 50.53639 |
| 22.04082 | 68.163 | 36.07294 | 48.47594 |
| 22.34694 | 68.163 | 37.12562 | 46.50302 |
| 22.65306 | 68.163 | 38.17986 | 44.61763 |
| 22.95918 | 68.163 | 39.23564 | 42.81977 |
| 23.26531 | 68.163 | 40.29298 | 41.10944 |
| 23.57143 | 68.163 | 41.35187 | 39.48663 |
| 23.87755 | 68.163 | 42.41231 | 37.95136 |
| 24.18367 | 68.163 | 43.47431 | 36.50361 |
| 24.4898  | 68.163 | 44.53786 | 35.1434  |
| 24.79592 | 68.163 | 45.60296 | 33.87071 |
| 25.10204 | 68.163 | 46.66961 | 32.68555 |
| 25.40816 | 68.163 | 47.73782 | 31.58793 |
| 25.71429 | 68.163 | 48.80757 | 30.57783 |
| 26.02041 | 68.163 | 49.87888 | 29.65526 |
| 26.32653 | 68.163 | 50.95175 | 28.82021 |
| 26.63265 | 68.163 | 52.02616 | 28.0727  |
| 26.93878 | 68.163 | 53.10213 | 27.41272 |
| 27.2449  | 68.163 | 54.17965 | 26.84027 |
| 27.55102 | 68.163 | 55.25872 | 26.35534 |
| 27.85714 | 68.163 | 56.33935 | 25.95795 |
| 28.16327 | 68.163 | 57.42153 | 25.64808 |
| 28.46939 | 68.163 | 58.50526 | 25.42574 |
| 28.77551 | 68.163 | 59.59054 | 25.29094 |
| 29.08163 | 68.163 | 60.67738 | 25.24366 |
| 29.38776 | 68.163 | 61.76576 | 25.28391 |
| 29.69388 | 68.163 | 62.8557  | 25.41169 |
| 30       | 68.163 | 63.9472  | 25.627   |
| 15       | 68.673 | 12.28499 | 118.0209 |
| 15.30612 | 68.673 | 13.30347 | 114.0355 |
| 15.61224 | 68.673 | 14.3235  | 110.1376 |
| 15.91837 | 68.673 | 15.34509 | 106.3272 |

|          |        |          |          |
|----------|--------|----------|----------|
| 16.22449 | 68.673 | 16.36823 | 102.6044 |
| 16.53061 | 68.673 | 17.39291 | 98.9691  |
| 16.83673 | 68.673 | 18.41916 | 95.42133 |
| 17.14286 | 68.673 | 19.44695 | 91.96109 |
| 17.44898 | 68.673 | 20.4763  | 88.58837 |
| 17.7551  | 68.673 | 21.50719 | 85.30319 |
| 18.06122 | 68.673 | 22.53965 | 82.10553 |
| 18.36735 | 68.673 | 23.57365 | 78.99541 |
| 18.67347 | 68.673 | 24.60921 | 75.97281 |
| 18.97959 | 68.673 | 25.64632 | 73.03774 |
| 19.28571 | 68.673 | 26.68498 | 70.1902  |
| 19.59184 | 68.673 | 27.72519 | 67.4302  |
| 19.89796 | 68.673 | 28.76696 | 64.75771 |
| 20.20408 | 68.673 | 29.81027 | 62.17276 |
| 20.5102  | 68.673 | 30.85515 | 59.67534 |
| 20.81633 | 68.673 | 31.90157 | 57.26545 |
| 21.12245 | 68.673 | 32.94955 | 54.94308 |
| 21.42857 | 68.673 | 33.99907 | 52.70825 |
| 21.73469 | 68.673 | 35.05016 | 50.56094 |
| 22.04082 | 68.673 | 36.10279 | 48.50117 |
| 22.34694 | 68.673 | 37.15698 | 46.52892 |
| 22.65306 | 68.673 | 38.21271 | 44.6442  |
| 22.95918 | 68.673 | 39.27    | 42.84701 |
| 23.26531 | 68.673 | 40.32885 | 41.13735 |
| 23.57143 | 68.673 | 41.38924 | 39.51522 |
| 23.87755 | 68.673 | 42.45119 | 37.98062 |
| 24.18367 | 68.673 | 43.51469 | 36.53355 |
| 24.4898  | 68.673 | 44.57975 | 35.17401 |
| 24.79592 | 68.673 | 45.64635 | 33.90199 |
| 25.10204 | 68.673 | 46.71451 | 32.71751 |
| 25.40816 | 68.673 | 47.78422 | 31.62055 |
| 25.71429 | 68.673 | 48.85548 | 30.61113 |
| 26.02041 | 68.673 | 49.9283  | 29.68923 |
| 26.32653 | 68.673 | 51.00267 | 28.85486 |
| 26.63265 | 68.673 | 52.07859 | 28.10802 |
| 26.93878 | 68.673 | 53.15606 | 27.44871 |
| 27.2449  | 68.673 | 54.23509 | 26.87693 |
| 27.55102 | 68.673 | 55.31567 | 26.39268 |
| 27.85714 | 68.673 | 56.3978  | 25.99596 |
| 28.16327 | 68.673 | 57.48148 | 25.68676 |
| 28.46939 | 68.673 | 58.56672 | 25.4651  |
| 28.77551 | 68.673 | 59.6535  | 25.33096 |
| 29.08163 | 68.673 | 60.74184 | 25.28436 |

|          |        |          |          |
|----------|--------|----------|----------|
| 29.38776 | 68.673 | 61.83174 | 25.32528 |
| 29.69388 | 68.673 | 62.92318 | 25.45373 |
| 30       | 68.673 | 64.01618 | 25.66972 |
| 15       | 69.184 | 12.2788  | 118.0288 |
| 15.30612 | 69.184 | 13.29879 | 114.044  |
| 15.61224 | 69.184 | 14.32032 | 110.1468 |
| 15.91837 | 69.184 | 15.34341 | 106.3371 |
| 16.22449 | 69.184 | 16.36805 | 102.615  |
| 16.53061 | 69.184 | 17.39425 | 98.98033 |
| 16.83673 | 69.184 | 18.42199 | 95.43323 |
| 17.14286 | 69.184 | 19.45129 | 91.97366 |
| 17.44898 | 69.184 | 20.48215 | 88.60162 |
| 17.7551  | 69.184 | 21.51455 | 85.31711 |
| 18.06122 | 69.184 | 22.54851 | 82.12012 |
| 18.36735 | 69.184 | 23.58402 | 79.01067 |
| 18.67347 | 69.184 | 24.62108 | 75.98875 |
| 18.97959 | 69.184 | 25.65969 | 73.05435 |
| 19.28571 | 69.184 | 26.69986 | 70.20748 |
| 19.59184 | 69.184 | 27.74158 | 67.44815 |
| 19.89796 | 69.184 | 28.78485 | 64.77634 |
| 20.20408 | 69.184 | 29.82967 | 62.19206 |
| 20.5102  | 69.184 | 30.87605 | 59.69531 |
| 20.81633 | 69.184 | 31.92398 | 57.28609 |
| 21.12245 | 69.184 | 32.97346 | 54.9644  |
| 21.42857 | 69.184 | 34.02449 | 52.73024 |
| 21.73469 | 69.184 | 35.07708 | 50.58361 |
| 22.04082 | 69.184 | 36.13122 | 48.5245  |
| 22.34694 | 69.184 | 37.18691 | 46.55293 |
| 22.65306 | 69.184 | 38.24415 | 44.66888 |
| 22.95918 | 69.184 | 39.30295 | 42.87237 |
| 23.26531 | 69.184 | 40.3633  | 41.16338 |
| 23.57143 | 69.184 | 41.4252  | 39.54192 |
| 23.87755 | 69.184 | 42.48865 | 38.00799 |
| 24.18367 | 69.184 | 43.55366 | 36.56159 |
| 24.4898  | 69.184 | 44.62022 | 35.20272 |
| 24.79592 | 69.184 | 45.68833 | 33.93138 |
| 25.10204 | 69.184 | 46.75799 | 32.74757 |
| 25.40816 | 69.184 | 47.82921 | 31.65129 |
| 25.71429 | 69.184 | 48.90198 | 30.64253 |
| 26.02041 | 69.184 | 49.9763  | 29.72131 |
| 26.32653 | 69.184 | 51.05217 | 28.88761 |
| 26.63265 | 69.184 | 52.1296  | 28.14145 |
| 26.93878 | 69.184 | 53.20858 | 27.48281 |

|          |        |          |          |
|----------|--------|----------|----------|
| 27.2449  | 69.184 | 54.28911 | 26.9117  |
| 27.55102 | 69.184 | 55.37119 | 26.42812 |
| 27.85714 | 69.184 | 56.45483 | 26.03207 |
| 28.16327 | 69.184 | 57.54002 | 25.72355 |
| 28.46939 | 69.184 | 58.62676 | 25.50256 |
| 28.77551 | 69.184 | 59.71505 | 25.3691  |
| 29.08163 | 69.184 | 60.8049  | 25.32317 |
| 29.38776 | 69.184 | 61.8963  | 25.36476 |
| 29.69388 | 69.184 | 62.98925 | 25.49389 |
| 30       | 69.184 | 64.08375 | 25.71054 |
| 15       | 69.694 | 12.27119 | 118.0347 |
| 15.30612 | 69.694 | 13.29268 | 114.0507 |
| 15.61224 | 69.694 | 14.31572 | 110.1541 |
| 15.91837 | 69.694 | 15.34032 | 106.3451 |
| 16.22449 | 69.694 | 16.36647 | 102.6236 |
| 16.53061 | 69.694 | 17.39417 | 98.98966 |
| 16.83673 | 69.694 | 18.42342 | 95.44323 |
| 17.14286 | 69.694 | 19.45422 | 91.98434 |
| 17.44898 | 69.694 | 20.48658 | 88.61297 |
| 17.7551  | 69.694 | 21.52049 | 85.32913 |
| 18.06122 | 69.694 | 22.55595 | 82.13282 |
| 18.36735 | 69.694 | 23.59297 | 79.02404 |
| 18.67347 | 69.694 | 24.63153 | 76.00279 |
| 18.97959 | 69.694 | 25.67165 | 73.06907 |
| 19.28571 | 69.694 | 26.71332 | 70.22287 |
| 19.59184 | 69.694 | 27.75655 | 67.46421 |
| 19.89796 | 69.694 | 28.80133 | 64.79307 |
| 20.20408 | 69.694 | 29.84766 | 62.20947 |
| 20.5102  | 69.694 | 30.89554 | 59.71339 |
| 20.81633 | 69.694 | 31.94497 | 57.30484 |
| 21.12245 | 69.694 | 32.99596 | 54.98383 |
| 21.42857 | 69.694 | 34.0485  | 52.75034 |
| 21.73469 | 69.694 | 35.10259 | 50.60438 |
| 22.04082 | 69.694 | 36.15823 | 48.54595 |
| 22.34694 | 69.694 | 37.21543 | 46.57504 |
| 22.65306 | 69.694 | 38.27418 | 44.69167 |
| 22.95918 | 69.694 | 39.33448 | 42.89583 |
| 23.26531 | 69.694 | 40.39634 | 41.18751 |
| 23.57143 | 69.694 | 41.45974 | 39.56673 |
| 23.87755 | 69.694 | 42.5247  | 38.03347 |
| 24.18367 | 69.694 | 43.59121 | 36.58775 |
| 24.4898  | 69.694 | 44.65928 | 35.22955 |
| 24.79592 | 69.694 | 45.72889 | 33.95888 |

|          |        |          |          |
|----------|--------|----------|----------|
| 25.10204 | 69.694 | 46.80006 | 32.77574 |
| 25.40816 | 69.694 | 47.87279 | 31.68013 |
| 25.71429 | 69.694 | 48.94706 | 30.67205 |
| 26.02041 | 69.694 | 50.02289 | 29.7515  |
| 26.32653 | 69.694 | 51.10026 | 28.91848 |
| 26.63265 | 69.694 | 52.1792  | 28.17298 |
| 26.93878 | 69.694 | 53.25968 | 27.51502 |
| 27.2449  | 69.694 | 54.34172 | 26.94458 |
| 27.55102 | 69.694 | 55.42531 | 26.46168 |
| 27.85714 | 69.694 | 56.51045 | 26.0663  |
| 28.16327 | 69.694 | 57.59714 | 25.75845 |
| 28.46939 | 69.694 | 58.68539 | 25.53813 |
| 28.77551 | 69.694 | 59.77519 | 25.40534 |
| 29.08163 | 69.694 | 60.86654 | 25.36008 |
| 29.38776 | 69.694 | 61.95944 | 25.40235 |
| 29.69388 | 69.694 | 63.0539  | 25.53215 |
| 30       | 69.694 | 64.14991 | 25.74948 |
| 15       | 70.204 | 12.26217 | 118.0388 |
| 15.30612 | 70.204 | 13.28516 | 114.0554 |
| 15.61224 | 70.204 | 14.30971 | 110.1595 |
| 15.91837 | 70.204 | 15.33581 | 106.3512 |
| 16.22449 | 70.204 | 16.36346 | 102.6304 |
| 16.53061 | 70.204 | 17.39267 | 98.9971  |
| 16.83673 | 70.204 | 18.42343 | 95.45135 |
| 17.14286 | 70.204 | 19.45574 | 91.99312 |
| 17.44898 | 70.204 | 20.4896  | 88.62243 |
| 17.7551  | 70.204 | 21.52501 | 85.33926 |
| 18.06122 | 70.204 | 22.56198 | 82.14362 |
| 18.36735 | 70.204 | 23.6005  | 79.03552 |
| 18.67347 | 70.204 | 24.64057 | 76.01494 |
| 18.97959 | 70.204 | 25.6822  | 73.08189 |
| 19.28571 | 70.204 | 26.72538 | 70.23637 |
| 19.59184 | 70.204 | 27.77011 | 67.47838 |
| 19.89796 | 70.204 | 28.81639 | 64.80791 |
| 20.20408 | 70.204 | 29.86422 | 62.22498 |
| 20.5102  | 70.204 | 30.91361 | 59.72958 |
| 20.81633 | 70.204 | 31.96455 | 57.3217  |
| 21.12245 | 70.204 | 33.01704 | 55.00136 |
| 21.42857 | 70.204 | 34.07109 | 52.76854 |
| 21.73469 | 70.204 | 35.12668 | 50.62325 |
| 22.04082 | 70.204 | 36.18383 | 48.5655  |
| 22.34694 | 70.204 | 37.24254 | 46.59527 |
| 22.65306 | 70.204 | 38.30279 | 44.71257 |



|          |        |          |          |
|----------|--------|----------|----------|
| 22.95918 | 70.204 | 39.3646  | 42.9174  |
| 23.26531 | 70.204 | 40.42796 | 41.20975 |
| 23.57143 | 70.204 | 41.49287 | 39.58964 |
| 23.87755 | 70.204 | 42.55933 | 38.05706 |
| 24.18367 | 70.204 | 43.62735 | 36.61201 |
| 24.4898  | 70.204 | 44.69692 | 35.25448 |
| 24.79592 | 70.204 | 45.76804 | 33.98449 |
| 25.10204 | 70.204 | 46.84072 | 32.80202 |
| 25.40816 | 70.204 | 47.91494 | 31.70708 |
| 25.71429 | 70.204 | 48.99072 | 30.69967 |
| 26.02041 | 70.204 | 50.06806 | 29.77979 |
| 26.32653 | 70.204 | 51.14694 | 28.94744 |
| 26.63265 | 70.204 | 52.22738 | 28.20262 |
| 26.93878 | 70.204 | 53.30937 | 27.54533 |
| 27.2449  | 70.204 | 54.39291 | 26.97557 |
| 27.55102 | 70.204 | 55.478   | 26.49334 |
| 27.85714 | 70.204 | 56.56465 | 26.09863 |
| 28.16327 | 70.204 | 57.65285 | 25.79146 |
| 28.46939 | 70.204 | 58.7426  | 25.57181 |
| 28.77551 | 70.204 | 59.8339  | 25.43969 |
| 29.08163 | 70.204 | 60.92676 | 25.39511 |
| 29.38776 | 70.204 | 62.02117 | 25.43805 |
| 29.69388 | 70.204 | 63.11713 | 25.56852 |
| 30       | 70.204 | 64.21465 | 25.78652 |
| 15       | 70.714 | 12.25173 | 118.041  |
| 15.30612 | 70.714 | 13.27623 | 114.0583 |
| 15.61224 | 70.714 | 14.30228 | 110.1631 |
| 15.91837 | 70.714 | 15.32989 | 106.3554 |
| 16.22449 | 70.714 | 16.35904 | 102.6353 |
| 16.53061 | 70.714 | 17.38975 | 99.00265 |
| 16.83673 | 70.714 | 18.42202 | 95.45757 |
| 17.14286 | 70.714 | 19.45583 | 92.00002 |
| 17.44898 | 70.714 | 20.4912  | 88.62999 |
| 17.7551  | 70.714 | 21.52812 | 85.3475  |
| 18.06122 | 70.714 | 22.56659 | 82.15254 |
| 18.36735 | 70.714 | 23.60662 | 79.0451  |
| 18.67347 | 70.714 | 24.6482  | 76.02519 |
| 18.97959 | 70.714 | 25.69133 | 73.09282 |
| 19.28571 | 70.714 | 26.73601 | 70.24797 |
| 19.59184 | 70.714 | 27.78225 | 67.49065 |
| 19.89796 | 70.714 | 28.83003 | 64.82086 |
| 20.20408 | 70.714 | 29.87937 | 62.2386  |
| 20.5102  | 70.714 | 30.93027 | 59.74387 |

|          |        |          |          |
|----------|--------|----------|----------|
| 20.81633 | 70.714 | 31.98271 | 57.33667 |
| 21.12245 | 70.714 | 33.03671 | 55.017   |
| 21.42857 | 70.714 | 34.09226 | 52.78485 |
| 21.73469 | 70.714 | 35.14936 | 50.64024 |
| 22.04082 | 70.714 | 36.20802 | 48.58315 |
| 22.34694 | 70.714 | 37.26823 | 46.6136  |
| 22.65306 | 70.714 | 38.32999 | 44.73157 |
| 22.95918 | 70.714 | 39.3933  | 42.93707 |
| 23.26531 | 70.714 | 40.45816 | 41.2301  |
| 23.57143 | 70.714 | 41.52458 | 39.61066 |
| 23.87755 | 70.714 | 42.59255 | 38.07875 |
| 24.18367 | 70.714 | 43.66207 | 36.63437 |
| 24.4898  | 70.714 | 44.73315 | 35.27752 |
| 24.79592 | 70.714 | 45.80578 | 34.0082  |
| 25.10204 | 70.714 | 46.87996 | 32.8264  |
| 25.40816 | 70.714 | 47.95569 | 31.73214 |
| 25.71429 | 70.714 | 49.03297 | 30.7254  |
| 26.02041 | 70.714 | 50.11181 | 29.8062  |
| 26.32653 | 70.714 | 51.1922  | 28.97452 |
| 26.63265 | 70.714 | 52.27414 | 28.23037 |
| 26.93878 | 70.714 | 53.35764 | 27.57375 |
| 27.2449  | 70.714 | 54.44268 | 27.00466 |
| 27.55102 | 70.714 | 55.52928 | 26.5231  |
| 27.85714 | 70.714 | 56.61744 | 26.12907 |
| 28.16327 | 70.714 | 57.70714 | 25.82257 |
| 28.46939 | 70.714 | 58.7984  | 25.6036  |
| 28.77551 | 70.714 | 59.89121 | 25.47215 |
| 29.08163 | 70.714 | 60.98557 | 25.42824 |
| 29.38776 | 70.714 | 62.08148 | 25.47185 |
| 29.69388 | 70.714 | 63.17895 | 25.603   |
| 30       | 70.714 | 64.27797 | 25.82167 |
| 15       | 71.224 | 12.23987 | 118.0413 |
| 15.30612 | 71.224 | 13.26588 | 114.0592 |
| 15.61224 | 71.224 | 14.29344 | 110.1647 |
| 15.91837 | 71.224 | 15.32255 | 106.3577 |
| 16.22449 | 71.224 | 16.35321 | 102.6382 |
| 16.53061 | 71.224 | 17.38543 | 99.0063  |
| 16.83673 | 71.224 | 18.41919 | 95.4619  |
| 17.14286 | 71.224 | 19.45452 | 92.00502 |
| 17.44898 | 71.224 | 20.49139 | 88.63567 |
| 17.7551  | 71.224 | 21.52981 | 85.35385 |
| 18.06122 | 71.224 | 22.56979 | 82.15956 |
| 18.36735 | 71.224 | 23.61132 | 79.05279 |

|          |        |          |          |
|----------|--------|----------|----------|
| 18.67347 | 71.224 | 24.65441 | 76.03356 |
| 18.97959 | 71.224 | 25.69904 | 73.10186 |
| 19.28571 | 71.224 | 26.74523 | 70.25768 |
| 19.59184 | 71.224 | 27.79297 | 67.50103 |
| 19.89796 | 71.224 | 28.84226 | 64.83192 |
| 20.20408 | 71.224 | 29.89311 | 62.25033 |
| 20.5102  | 71.224 | 30.94551 | 59.75627 |
| 20.81633 | 71.224 | 31.99946 | 57.34974 |
| 21.12245 | 71.224 | 33.05496 | 55.03074 |
| 21.42857 | 71.224 | 34.11202 | 52.79927 |
| 21.73469 | 71.224 | 35.17063 | 50.65533 |
| 22.04082 | 71.224 | 36.23079 | 48.59892 |
| 22.34694 | 71.224 | 37.2925  | 46.63003 |
| 22.65306 | 71.224 | 38.35576 | 44.74868 |
| 22.95918 | 71.224 | 39.42058 | 42.95486 |
| 23.26531 | 71.224 | 40.48695 | 41.24856 |
| 23.57143 | 71.224 | 41.55488 | 39.62979 |
| 23.87755 | 71.224 | 42.62435 | 38.09856 |
| 24.18367 | 71.224 | 43.69538 | 36.65485 |
| 24.4898  | 71.224 | 44.76796 | 35.29867 |
| 24.79592 | 71.224 | 45.84209 | 34.03002 |
| 25.10204 | 71.224 | 46.91778 | 32.8489  |
| 25.40816 | 71.224 | 47.99502 | 31.7553  |
| 25.71429 | 71.224 | 49.07381 | 30.74924 |
| 26.02041 | 71.224 | 50.15415 | 29.83071 |
| 26.32653 | 71.224 | 51.23604 | 28.9997  |
| 26.63265 | 71.224 | 52.31949 | 28.25623 |
| 26.93878 | 71.224 | 53.40449 | 27.60028 |
| 27.2449  | 71.224 | 54.49104 | 27.03187 |
| 27.55102 | 71.224 | 55.57915 | 26.55098 |
| 27.85714 | 71.224 | 56.66881 | 26.15762 |
| 28.16327 | 71.224 | 57.76002 | 25.85179 |
| 28.46939 | 71.224 | 58.85278 | 25.63349 |
| 28.77551 | 71.224 | 59.94709 | 25.50272 |
| 29.08163 | 71.224 | 61.04296 | 25.45948 |
| 29.38776 | 71.224 | 62.14038 | 25.50376 |
| 29.69388 | 71.224 | 63.23935 | 25.63558 |
| 30       | 71.224 | 64.33988 | 25.85493 |
| 15       | 71.735 | 12.2266  | 118.0397 |
| 15.30612 | 71.735 | 13.25411 | 114.0583 |
| 15.61224 | 71.735 | 14.28318 | 110.1645 |
| 15.91837 | 71.735 | 15.31379 | 106.3581 |
| 16.22449 | 71.735 | 16.34596 | 102.6393 |

|          |        |          |          |
|----------|--------|----------|----------|
| 16.53061 | 71.735 | 17.37968 | 99.00807 |
| 16.83673 | 71.735 | 18.41496 | 95.46433 |
| 17.14286 | 71.735 | 19.45178 | 92.00813 |
| 17.44898 | 71.735 | 20.49016 | 88.63945 |
| 17.7551  | 71.735 | 21.53009 | 85.3583  |
| 18.06122 | 71.735 | 22.57158 | 82.16468 |
| 18.36735 | 71.735 | 23.61461 | 79.05859 |
| 18.67347 | 71.735 | 24.6592  | 76.04003 |
| 18.97959 | 71.735 | 25.70534 | 73.109   |
| 19.28571 | 71.735 | 26.75304 | 70.2655  |
| 19.59184 | 71.735 | 27.80228 | 67.50953 |
| 19.89796 | 71.735 | 28.85308 | 64.84108 |
| 20.20408 | 71.735 | 29.90543 | 62.26017 |
| 20.5102  | 71.735 | 30.95933 | 59.76678 |
| 20.81633 | 71.735 | 32.01479 | 57.36092 |
| 21.12245 | 71.735 | 33.0718  | 55.0426  |
| 21.42857 | 71.735 | 34.13036 | 52.8118  |
| 21.73469 | 71.735 | 35.19047 | 50.66853 |
| 22.04082 | 71.735 | 36.25214 | 48.61279 |
| 22.34694 | 71.735 | 37.31536 | 46.64458 |
| 22.65306 | 71.735 | 38.38013 | 44.7639  |
| 22.95918 | 71.735 | 39.44645 | 42.97075 |
| 23.26531 | 71.735 | 40.51433 | 41.26512 |
| 23.57143 | 71.735 | 41.58376 | 39.64703 |
| 23.87755 | 71.735 | 42.65474 | 38.11646 |
| 24.18367 | 71.735 | 43.72727 | 36.67343 |
| 24.4898  | 71.735 | 44.80136 | 35.31792 |
| 24.79592 | 71.735 | 45.87699 | 34.04995 |
| 25.10204 | 71.735 | 46.95418 | 32.8695  |
| 25.40816 | 71.735 | 48.03293 | 31.77658 |
| 25.71429 | 71.735 | 49.11322 | 30.77119 |
| 26.02041 | 71.735 | 50.19507 | 29.85333 |
| 26.32653 | 71.735 | 51.27847 | 29.023   |
| 26.63265 | 71.735 | 52.36343 | 28.28019 |
| 26.93878 | 71.735 | 53.44993 | 27.62492 |
| 27.2449  | 71.735 | 54.53799 | 27.05718 |
| 27.55102 | 71.735 | 55.6276  | 26.57696 |
| 27.85714 | 71.735 | 56.71876 | 26.18427 |
| 28.16327 | 71.735 | 57.81148 | 25.87912 |
| 28.46939 | 71.735 | 58.90575 | 25.66149 |
| 28.77551 | 71.735 | 60.00157 | 25.53139 |
| 29.08163 | 71.735 | 61.09894 | 25.48882 |
| 29.38776 | 71.735 | 62.19786 | 25.53378 |

|          |        |          |          |
|----------|--------|----------|----------|
| 29.69388 | 71.735 | 63.29834 | 25.66627 |
| 30       | 71.735 | 64.40037 | 25.88629 |
| 15       | 72.245 | 12.21191 | 118.0362 |
| 15.30612 | 72.245 | 13.24093 | 114.0555 |
| 15.61224 | 72.245 | 14.2715  | 110.1623 |
| 15.91837 | 72.245 | 15.30362 | 106.3567 |
| 16.22449 | 72.245 | 16.3373  | 102.6385 |
| 16.53061 | 72.245 | 17.37252 | 99.00794 |
| 16.83673 | 72.245 | 18.4093  | 95.46488 |
| 17.14286 | 72.245 | 19.44763 | 92.00934 |
| 17.44898 | 72.245 | 20.48752 | 88.64134 |
| 17.7551  | 72.245 | 21.52895 | 85.36086 |
| 18.06122 | 72.245 | 22.57194 | 82.16792 |
| 18.36735 | 72.245 | 23.61649 | 79.0625  |
| 18.67347 | 72.245 | 24.66258 | 76.04461 |
| 18.97959 | 72.245 | 25.71023 | 73.11425 |
| 19.28571 | 72.245 | 26.75942 | 70.27142 |
| 19.59184 | 72.245 | 27.81018 | 67.51612 |
| 19.89796 | 72.245 | 28.86248 | 64.84835 |
| 20.20408 | 72.245 | 29.91634 | 62.26811 |
| 20.5102  | 72.245 | 30.97175 | 59.7754  |
| 20.81633 | 72.245 | 32.02871 | 57.37021 |
| 21.12245 | 72.245 | 33.08722 | 55.05256 |
| 21.42857 | 72.245 | 34.14729 | 52.82243 |
| 21.73469 | 72.245 | 35.20891 | 50.67984 |
| 22.04082 | 72.245 | 36.27208 | 48.62477 |
| 22.34694 | 72.245 | 37.3368  | 46.65723 |
| 22.65306 | 72.245 | 38.40308 | 44.77722 |
| 22.95918 | 72.245 | 39.47091 | 42.98475 |
| 23.26531 | 72.245 | 40.54029 | 41.27979 |
| 23.57143 | 72.245 | 41.61122 | 39.66237 |
| 23.87755 | 72.245 | 42.68371 | 38.13248 |
| 24.18367 | 72.245 | 43.75775 | 36.69012 |
| 24.4898  | 72.245 | 44.83334 | 35.33528 |
| 24.79592 | 72.245 | 45.91048 | 34.06798 |
| 25.10204 | 72.245 | 46.98918 | 32.8882  |
| 25.40816 | 72.245 | 48.06943 | 31.79596 |
| 25.71429 | 72.245 | 49.15123 | 30.79124 |
| 26.02041 | 72.245 | 50.23458 | 29.87405 |
| 26.32653 | 72.245 | 51.31949 | 29.04439 |
| 26.63265 | 72.245 | 52.40594 | 28.30226 |
| 26.93878 | 72.245 | 53.49396 | 27.64766 |
| 27.2449  | 72.245 | 54.58352 | 27.08059 |

|          |        |          |          |
|----------|--------|----------|----------|
| 27.55102 | 72.245 | 55.67463 | 26.60105 |
| 27.85714 | 72.245 | 56.7673  | 26.20904 |
| 28.16327 | 72.245 | 57.86152 | 25.90455 |
| 28.46939 | 72.245 | 58.9573  | 25.6876  |
| 28.77551 | 72.245 | 60.05462 | 25.55817 |
| 29.08163 | 72.245 | 61.1535  | 25.51628 |
| 29.38776 | 72.245 | 62.25393 | 25.56191 |
| 29.69388 | 72.245 | 63.35592 | 25.69507 |
| 30       | 72.245 | 64.45945 | 25.91576 |
| 15       | 72.755 | 12.19581 | 118.0308 |
| 15.30612 | 72.755 | 13.22634 | 114.0508 |
| 15.61224 | 72.755 | 14.25841 | 110.1583 |
| 15.91837 | 72.755 | 15.29204 | 106.3533 |
| 16.22449 | 72.755 | 16.32722 | 102.6358 |
| 16.53061 | 72.755 | 17.36395 | 99.00592 |
| 16.83673 | 72.755 | 18.40223 | 95.46353 |
| 17.14286 | 72.755 | 19.44207 | 92.00867 |
| 17.44898 | 72.755 | 20.48346 | 88.64133 |
| 17.7551  | 72.755 | 21.5264  | 85.36153 |
| 18.06122 | 72.755 | 22.5709  | 82.16926 |
| 18.36735 | 72.755 | 23.61694 | 79.06451 |
| 18.67347 | 72.755 | 24.66454 | 76.0473  |
| 18.97959 | 72.755 | 25.71369 | 73.11761 |
| 19.28571 | 72.755 | 26.7644  | 70.27546 |
| 19.59184 | 72.755 | 27.81666 | 67.52083 |
| 19.89796 | 72.755 | 28.87047 | 64.85373 |
| 20.20408 | 72.755 | 29.92583 | 62.27416 |
| 20.5102  | 72.755 | 30.98274 | 59.78212 |
| 20.81633 | 72.755 | 32.04121 | 57.37761 |
| 21.12245 | 72.755 | 33.10123 | 55.06063 |
| 21.42857 | 72.755 | 34.1628  | 52.83118 |
| 21.73469 | 72.755 | 35.22592 | 50.68925 |
| 22.04082 | 72.755 | 36.2906  | 48.63486 |
| 22.34694 | 72.755 | 37.35683 | 46.66799 |
| 22.65306 | 72.755 | 38.42461 | 44.78866 |
| 22.95918 | 72.755 | 39.49394 | 42.99685 |
| 23.26531 | 72.755 | 40.56483 | 41.29257 |
| 23.57143 | 72.755 | 41.63727 | 39.67583 |
| 23.87755 | 72.755 | 42.71126 | 38.14661 |
| 24.18367 | 72.755 | 43.78681 | 36.70492 |
| 24.4898  | 72.755 | 44.8639  | 35.35075 |
| 24.79592 | 72.755 | 45.94255 | 34.08412 |
| 25.10204 | 72.755 | 47.02275 | 32.90502 |

|          |        |          |          |
|----------|--------|----------|----------|
| 25.40816 | 72.755 | 48.10451 | 31.81345 |
| 25.71429 | 72.755 | 49.18781 | 30.8094  |
| 26.02041 | 72.755 | 50.27267 | 29.89289 |
| 26.32653 | 72.755 | 51.35908 | 29.0639  |
| 26.63265 | 72.755 | 52.44705 | 28.32244 |
| 26.93878 | 72.755 | 53.53656 | 27.66852 |
| 27.2449  | 72.755 | 54.62763 | 27.10212 |
| 27.55102 | 72.755 | 55.72025 | 26.62325 |
| 27.85714 | 72.755 | 56.81443 | 26.23191 |
| 28.16327 | 72.755 | 57.91015 | 25.9281  |
| 28.46939 | 72.755 | 59.00743 | 25.71181 |
| 28.77551 | 72.755 | 60.10626 | 25.58306 |
| 29.08163 | 72.755 | 61.20665 | 25.54184 |
| 29.38776 | 72.755 | 62.30858 | 25.58814 |
| 29.69388 | 72.755 | 63.41207 | 25.72198 |
| 30       | 72.755 | 64.51711 | 25.94334 |
| 15       | 73.265 | 12.1783  | 118.0235 |
| 15.30612 | 73.265 | 13.21032 | 114.0442 |
| 15.61224 | 73.265 | 14.2439  | 110.1523 |
| 15.91837 | 73.265 | 15.27904 | 106.348  |
| 16.22449 | 73.265 | 16.31572 | 102.6313 |
| 16.53061 | 73.265 | 17.35396 | 99.002   |
| 16.83673 | 73.265 | 18.39375 | 95.46028 |
| 17.14286 | 73.265 | 19.43509 | 92.0061  |
| 17.44898 | 73.265 | 20.47799 | 88.63944 |
| 17.7551  | 73.265 | 21.52243 | 85.36031 |
| 18.06122 | 73.265 | 22.56843 | 82.16871 |
| 18.36735 | 73.265 | 23.61599 | 79.06464 |
| 18.67347 | 73.265 | 24.66509 | 76.04809 |
| 18.97959 | 73.265 | 25.71575 | 73.11908 |
| 19.28571 | 73.265 | 26.76796 | 70.2776  |
| 19.59184 | 73.265 | 27.82172 | 67.52364 |
| 19.89796 | 73.265 | 28.87703 | 64.85722 |
| 20.20408 | 73.265 | 29.9339  | 62.27832 |
| 20.5102  | 73.265 | 30.99232 | 59.78695 |
| 20.81633 | 73.265 | 32.05229 | 57.38312 |
| 21.12245 | 73.265 | 33.11382 | 55.06681 |
| 21.42857 | 73.265 | 34.1769  | 52.83803 |
| 21.73469 | 73.265 | 35.24153 | 50.69678 |
| 22.04082 | 73.265 | 36.30771 | 48.64305 |
| 22.34694 | 73.265 | 37.37544 | 46.67686 |
| 22.65306 | 73.265 | 38.44473 | 44.7982  |
| 22.95918 | 73.265 | 39.51557 | 43.00706 |

|          |        |          |          |
|----------|--------|----------|----------|
| 23.26531 | 73.265 | 40.58796 | 41.30346 |
| 23.57143 | 73.265 | 41.6619  | 39.68738 |
| 23.87755 | 73.265 | 42.7374  | 38.15884 |
| 24.18367 | 73.265 | 43.81445 | 36.71782 |
| 24.4898  | 73.265 | 44.89305 | 35.36433 |
| 24.79592 | 73.265 | 45.97321 | 34.09837 |
| 25.10204 | 73.265 | 47.05491 | 32.91994 |
| 25.40816 | 73.265 | 48.13817 | 31.82904 |
| 25.71429 | 73.265 | 49.22299 | 30.82567 |
| 26.02041 | 73.265 | 50.30935 | 29.90983 |
| 26.32653 | 73.265 | 51.39727 | 29.08151 |
| 26.63265 | 73.265 | 52.48674 | 28.34073 |
| 26.93878 | 73.265 | 53.57776 | 27.68748 |
| 27.2449  | 73.265 | 54.67033 | 27.12175 |
| 27.55102 | 73.265 | 55.76446 | 26.64355 |
| 27.85714 | 73.265 | 56.86014 | 26.25289 |
| 28.16327 | 73.265 | 57.95737 | 25.94975 |
| 28.46939 | 73.265 | 59.05615 | 25.73414 |
| 28.77551 | 73.265 | 60.15649 | 25.60606 |
| 29.08163 | 73.265 | 61.25838 | 25.56551 |
| 29.38776 | 73.265 | 62.36182 | 25.61249 |
| 29.69388 | 73.265 | 63.46681 | 25.74699 |
| 30       | 73.265 | 64.57336 | 25.96903 |
| 15       | 73.776 | 12.15936 | 118.0144 |
| 15.30612 | 73.776 | 13.1929  | 114.0357 |
| 15.61224 | 73.776 | 14.22798 | 110.1445 |
| 15.91837 | 73.776 | 15.26462 | 106.3409 |
| 16.22449 | 73.776 | 16.30281 | 102.6248 |
| 16.53061 | 73.776 | 17.34255 | 98.99619 |
| 16.83673 | 73.776 | 18.38385 | 95.45515 |
| 17.14286 | 73.776 | 19.4267  | 92.00164 |
| 17.44898 | 73.776 | 20.4711  | 88.63565 |
| 17.7551  | 73.776 | 21.51705 | 85.35719 |
| 18.06122 | 73.776 | 22.56456 | 82.16626 |
| 18.36735 | 73.776 | 23.61361 | 79.06287 |
| 18.67347 | 73.776 | 24.66422 | 76.047   |
| 18.97959 | 73.776 | 25.71639 | 73.11866 |
| 19.28571 | 73.776 | 26.7701  | 70.27785 |
| 19.59184 | 73.776 | 27.82537 | 67.52456 |
| 19.89796 | 73.776 | 28.88219 | 64.85881 |
| 20.20408 | 73.776 | 29.94056 | 62.28059 |
| 20.5102  | 73.776 | 31.00049 | 59.78989 |
| 20.81633 | 73.776 | 32.06196 | 57.38673 |



|          |        |          |          |
|----------|--------|----------|----------|
| 21.12245 | 73.776 | 33.12499 | 55.07109 |
| 21.42857 | 73.776 | 34.18958 | 52.84298 |
| 21.73469 | 73.776 | 35.25571 | 50.70241 |
| 22.04082 | 73.776 | 36.3234  | 48.64936 |
| 22.34694 | 73.776 | 37.39264 | 46.68384 |
| 22.65306 | 73.776 | 38.46343 | 44.80585 |
| 22.95918 | 73.776 | 39.53578 | 43.01539 |
| 23.26531 | 73.776 | 40.60967 | 41.31245 |
| 23.57143 | 73.776 | 41.68512 | 39.69705 |
| 23.87755 | 73.776 | 42.76213 | 38.16918 |
| 24.18367 | 73.776 | 43.84068 | 36.72883 |
| 24.4898  | 73.776 | 44.92079 | 35.37602 |
| 24.79592 | 73.776 | 46.00245 | 34.11073 |
| 25.10204 | 73.776 | 47.08566 | 32.93297 |
| 25.40816 | 73.776 | 48.17042 | 31.84275 |
| 25.71429 | 73.776 | 49.25674 | 30.84005 |
| 26.02041 | 73.776 | 50.34461 | 29.92488 |
| 26.32653 | 73.776 | 51.43403 | 29.09724 |
| 26.63265 | 73.776 | 52.52501 | 28.35713 |
| 26.93878 | 73.776 | 53.61754 | 27.70454 |
| 27.2449  | 73.776 | 54.71162 | 27.13949 |
| 27.55102 | 73.776 | 55.80725 | 26.66197 |
| 27.85714 | 73.776 | 56.90443 | 26.27197 |
| 28.16327 | 73.776 | 58.00317 | 25.96951 |
| 28.46939 | 73.776 | 59.10346 | 25.75457 |
| 28.77551 | 73.776 | 60.2053  | 25.62716 |
| 29.08163 | 73.776 | 61.30869 | 25.58728 |
| 29.38776 | 73.776 | 62.41364 | 25.63493 |
| 29.69388 | 73.776 | 63.52014 | 25.77011 |
| 30       | 73.776 | 64.62819 | 25.99282 |
| 15       | 74.286 | 12.13902 | 118.0033 |
| 15.30612 | 74.286 | 13.17405 | 114.0253 |
| 15.61224 | 74.286 | 14.21065 | 110.1348 |
| 15.91837 | 74.286 | 15.24879 | 106.3318 |
| 16.22449 | 74.286 | 16.28848 | 102.6164 |
| 16.53061 | 74.286 | 17.32973 | 98.9885  |
| 16.83673 | 74.286 | 18.37253 | 95.44812 |
| 17.14286 | 74.286 | 19.41689 | 91.99528 |
| 17.44898 | 74.286 | 20.46279 | 88.62997 |
| 17.7551  | 74.286 | 21.51025 | 85.35218 |
| 18.06122 | 74.286 | 22.55926 | 82.16193 |
| 18.36735 | 74.286 | 23.60982 | 79.0592  |
| 18.67347 | 74.286 | 24.66194 | 76.04401 |

|          |        |          |          |
|----------|--------|----------|----------|
| 18.97959 | 74.286 | 25.71561 | 73.11634 |
| 19.28571 | 74.286 | 26.77083 | 70.2762  |
| 19.59184 | 74.286 | 27.8276  | 67.52359 |
| 19.89796 | 74.286 | 28.88593 | 64.85851 |
| 20.20408 | 74.286 | 29.94581 | 62.28096 |
| 20.5102  | 74.286 | 31.00724 | 59.79094 |
| 20.81633 | 74.286 | 32.07022 | 57.38845 |
| 21.12245 | 74.286 | 33.13475 | 55.07348 |
| 21.42857 | 74.286 | 34.20084 | 52.84605 |
| 21.73469 | 74.286 | 35.26848 | 50.70614 |
| 22.04082 | 74.286 | 36.33768 | 48.65377 |
| 22.34694 | 74.286 | 37.40842 | 46.68892 |
| 22.65306 | 74.286 | 38.48072 | 44.8116  |
| 22.95918 | 74.286 | 39.55457 | 43.02181 |
| 23.26531 | 74.286 | 40.62997 | 41.31956 |
| 23.57143 | 74.286 | 41.70693 | 39.70483 |
| 23.87755 | 74.286 | 42.78543 | 38.17762 |
| 24.18367 | 74.286 | 43.86549 | 36.73795 |
| 24.4898  | 74.286 | 44.94711 | 35.38581 |
| 24.79592 | 74.286 | 46.03027 | 34.1212  |
| 25.10204 | 74.286 | 47.11499 | 32.94411 |
| 25.40816 | 74.286 | 48.20126 | 31.85456 |
| 25.71429 | 74.286 | 49.28908 | 30.85253 |
| 26.02041 | 74.286 | 50.37846 | 29.93803 |
| 26.32653 | 74.286 | 51.46939 | 29.11107 |
| 26.63265 | 74.286 | 52.56187 | 28.37163 |
| 26.93878 | 74.286 | 53.6559  | 27.71972 |
| 27.2449  | 74.286 | 54.75148 | 27.15534 |
| 27.55102 | 74.286 | 55.84862 | 26.67849 |
| 27.85714 | 74.286 | 56.94731 | 26.28916 |
| 28.16327 | 74.286 | 58.04755 | 25.98737 |
| 28.46939 | 74.286 | 59.14935 | 25.77311 |
| 28.77551 | 74.286 | 60.2527  | 25.64637 |
| 29.08163 | 74.286 | 61.3576  | 25.60717 |
| 29.38776 | 74.286 | 62.46405 | 25.65549 |
| 29.69388 | 74.286 | 63.57205 | 25.79134 |
| 30       | 74.286 | 64.68161 | 26.01473 |
| 15       | 74.796 | 12.11725 | 117.9903 |
| 15.30612 | 74.796 | 13.1538  | 114.013  |
| 15.61224 | 74.796 | 14.19189 | 110.1232 |
| 15.91837 | 74.796 | 15.23154 | 106.3209 |
| 16.22449 | 74.796 | 16.27274 | 102.6061 |
| 16.53061 | 74.796 | 17.3155  | 98.9789  |

|          |        |          |          |
|----------|--------|----------|----------|
| 16.83673 | 74.796 | 18.3598  | 95.43921 |
| 17.14286 | 74.796 | 19.40566 | 91.98704 |
| 17.44898 | 74.796 | 20.45307 | 88.62239 |
| 17.7551  | 74.796 | 21.50204 | 85.34528 |
| 18.06122 | 74.796 | 22.55255 | 82.1557  |
| 18.36735 | 74.796 | 23.60462 | 79.05365 |
| 18.67347 | 74.796 | 24.65824 | 76.03912 |
| 18.97959 | 74.796 | 25.71342 | 73.11213 |
| 19.28571 | 74.796 | 26.77014 | 70.27266 |
| 19.59184 | 74.796 | 27.82842 | 67.52073 |
| 19.89796 | 74.796 | 28.88825 | 64.85632 |
| 20.20408 | 74.796 | 29.94963 | 62.27944 |
| 20.5102  | 74.796 | 31.01257 | 59.79009 |
| 20.81633 | 74.796 | 32.07706 | 57.38827 |
| 21.12245 | 74.796 | 33.1431  | 55.07398 |
| 21.42857 | 74.796 | 34.21069 | 52.84722 |
| 21.73469 | 74.796 | 35.27984 | 50.70799 |
| 22.04082 | 74.796 | 36.35054 | 48.65629 |
| 22.34694 | 74.796 | 37.42279 | 46.69211 |
| 22.65306 | 74.796 | 38.49659 | 44.81547 |
| 22.95918 | 74.796 | 39.57195 | 43.02635 |
| 23.26531 | 74.796 | 40.64885 | 41.32476 |
| 23.57143 | 74.796 | 41.72731 | 39.71071 |
| 23.87755 | 74.796 | 42.80733 | 38.18418 |
| 24.18367 | 74.796 | 43.88889 | 36.74518 |
| 24.4898  | 74.796 | 44.97201 | 35.39371 |
| 24.79592 | 74.796 | 46.05668 | 34.12977 |
| 25.10204 | 74.796 | 47.14291 | 32.95336 |
| 25.40816 | 74.796 | 48.23068 | 31.86447 |
| 25.71429 | 74.796 | 49.32001 | 30.86312 |
| 26.02041 | 74.796 | 50.41089 | 29.9493  |
| 26.32653 | 74.796 | 51.50332 | 29.123   |
| 26.63265 | 74.796 | 52.59731 | 28.38424 |
| 26.93878 | 74.796 | 53.69285 | 27.733   |
| 27.2449  | 74.796 | 54.78994 | 27.16929 |
| 27.55102 | 74.796 | 55.88858 | 26.69311 |
| 27.85714 | 74.796 | 56.98877 | 26.30446 |
| 28.16327 | 74.796 | 58.09052 | 26.00334 |
| 28.46939 | 74.796 | 59.19382 | 25.78975 |
| 28.77551 | 74.796 | 60.29867 | 25.66369 |
| 29.08163 | 74.796 | 61.40508 | 25.62516 |
| 29.38776 | 74.796 | 62.51304 | 25.67416 |
| 29.69388 | 74.796 | 63.62255 | 25.81068 |

|          |        |          |          |
|----------|--------|----------|----------|
| 30       | 74.796 | 64.73361 | 26.03474 |
| 15       | 75.306 | 12.09407 | 117.9755 |
| 15.30612 | 75.306 | 13.13212 | 113.9988 |
| 15.61224 | 75.306 | 14.17173 | 110.1097 |
| 15.91837 | 75.306 | 15.21288 | 106.3081 |
| 16.22449 | 75.306 | 16.25559 | 102.594  |
| 16.53061 | 75.306 | 17.29985 | 98.96742 |
| 16.83673 | 75.306 | 18.34566 | 95.42839 |
| 17.14286 | 75.306 | 19.39302 | 91.9769  |
| 17.44898 | 75.306 | 20.44194 | 88.61293 |
| 17.7551  | 75.306 | 21.49241 | 85.33649 |
| 18.06122 | 75.306 | 22.54443 | 82.14758 |
| 18.36735 | 75.306 | 23.598   | 79.0462  |
| 18.67347 | 75.306 | 24.65313 | 76.03235 |
| 18.97959 | 75.306 | 25.70981 | 73.10603 |
| 19.28571 | 75.306 | 26.76804 | 70.26723 |
| 19.59184 | 75.306 | 27.82782 | 67.51597 |
| 19.89796 | 75.306 | 28.88916 | 64.85224 |
| 20.20408 | 75.306 | 29.95205 | 62.27603 |
| 20.5102  | 75.306 | 31.01649 | 59.78736 |
| 20.81633 | 75.306 | 32.08248 | 57.38621 |
| 21.12245 | 75.306 | 33.15003 | 55.07259 |
| 21.42857 | 75.306 | 34.21913 | 52.8465  |
| 21.73469 | 75.306 | 35.28978 | 50.70794 |
| 22.04082 | 75.306 | 36.36198 | 48.65691 |
| 22.34694 | 75.306 | 37.43574 | 46.69341 |
| 22.65306 | 75.306 | 38.51105 | 44.81744 |
| 22.95918 | 75.306 | 39.58791 | 43.029   |
| 23.26531 | 75.306 | 40.66632 | 41.32808 |
| 23.57143 | 75.306 | 41.74629 | 39.7147  |
| 23.87755 | 75.306 | 42.82781 | 38.18884 |
| 24.18367 | 75.306 | 43.91088 | 36.75051 |
| 24.4898  | 75.306 | 44.9955  | 35.39972 |
| 24.79592 | 75.306 | 46.08168 | 34.13645 |
| 25.10204 | 75.306 | 47.1694  | 32.96071 |
| 25.40816 | 75.306 | 48.25869 | 31.8725  |
| 25.71429 | 75.306 | 49.34952 | 30.87182 |
| 26.02041 | 75.306 | 50.4419  | 29.95867 |
| 26.32653 | 75.306 | 51.53584 | 29.13305 |
| 26.63265 | 75.306 | 52.63133 | 28.39495 |
| 26.93878 | 75.306 | 53.72838 | 27.74439 |
| 27.2449  | 75.306 | 54.82697 | 27.18135 |
| 27.55102 | 75.306 | 55.92712 | 26.70585 |

|          |        |          |          |
|----------|--------|----------|----------|
| 27.85714 | 75.306 | 57.02882 | 26.31787 |
| 28.16327 | 75.306 | 58.13208 | 26.01743 |
| 28.46939 | 75.306 | 59.23688 | 25.80451 |
| 28.77551 | 75.306 | 60.34324 | 25.67912 |
| 29.08163 | 75.306 | 61.45115 | 25.64126 |
| 29.38776 | 75.306 | 62.56061 | 25.69093 |
| 29.69388 | 75.306 | 63.67163 | 25.82813 |
| 30       | 75.306 | 64.7842  | 26.05285 |
| 15       | 75.816 | 12.06948 | 117.9588 |
| 15.30612 | 75.816 | 13.10904 | 113.9828 |
| 15.61224 | 75.816 | 14.15014 | 110.0943 |
| 15.91837 | 75.816 | 15.1928  | 106.2933 |
| 16.22449 | 75.816 | 16.23701 | 102.5799 |
| 16.53061 | 75.816 | 17.28278 | 98.95404 |
| 16.83673 | 75.816 | 18.3301  | 95.41569 |
| 17.14286 | 75.816 | 19.37896 | 91.96487 |
| 17.44898 | 75.816 | 20.42939 | 88.60157 |
| 17.7551  | 75.816 | 21.48136 | 85.3258  |
| 18.06122 | 75.816 | 22.53489 | 82.13757 |
| 18.36735 | 75.816 | 23.58997 | 79.03686 |
| 18.67347 | 75.816 | 24.6466  | 76.02368 |
| 18.97959 | 75.816 | 25.70478 | 73.09803 |
| 19.28571 | 75.816 | 26.76452 | 70.25991 |
| 19.59184 | 75.816 | 27.82581 | 67.50932 |
| 19.89796 | 75.816 | 28.88865 | 64.84626 |
| 20.20408 | 75.816 | 29.95304 | 62.27073 |
| 20.5102  | 75.816 | 31.01899 | 59.78272 |
| 20.81633 | 75.816 | 32.08649 | 57.38225 |
| 21.12245 | 75.816 | 33.15554 | 55.06931 |
| 21.42857 | 75.816 | 34.22615 | 52.84389 |
| 21.73469 | 75.816 | 35.2983  | 50.706   |
| 22.04082 | 75.816 | 36.37201 | 48.65564 |
| 22.34694 | 75.816 | 37.44727 | 46.69282 |
| 22.65306 | 75.816 | 38.52409 | 44.81752 |
| 22.95918 | 75.816 | 39.60245 | 43.02975 |
| 23.26531 | 75.816 | 40.68237 | 41.32951 |
| 23.57143 | 75.816 | 41.76384 | 39.71679 |
| 23.87755 | 75.816 | 42.84687 | 38.19161 |
| 24.18367 | 75.816 | 43.93144 | 36.75396 |
| 24.4898  | 75.816 | 45.01757 | 35.40383 |
| 24.79592 | 75.816 | 46.10525 | 34.14124 |
| 25.10204 | 75.816 | 47.19449 | 32.96617 |
| 25.40816 | 75.816 | 48.28528 | 31.87863 |

|          |        |          |          |
|----------|--------|----------|----------|
| 25.71429 | 75.816 | 49.37761 | 30.87863 |
| 26.02041 | 75.816 | 50.47151 | 29.96615 |
| 26.32653 | 75.816 | 51.56695 | 29.1412  |
| 26.63265 | 75.816 | 52.66395 | 28.40378 |
| 26.93878 | 75.816 | 53.76249 | 27.75389 |
| 27.2449  | 75.816 | 54.86259 | 27.19152 |
| 27.55102 | 75.816 | 55.96425 | 26.71669 |
| 27.85714 | 75.816 | 57.06745 | 26.32939 |
| 28.16327 | 75.816 | 58.17221 | 26.02961 |
| 28.46939 | 75.816 | 59.27852 | 25.81737 |
| 28.77551 | 75.816 | 60.38639 | 25.69265 |
| 29.08163 | 75.816 | 61.4958  | 25.65546 |
| 29.38776 | 75.816 | 62.60677 | 25.70581 |
| 29.69388 | 75.816 | 63.71929 | 25.84368 |
| 30       | 75.816 | 64.83337 | 26.06908 |
| 15       | 76.327 | 12.04347 | 117.9401 |
| 15.30612 | 76.327 | 13.08453 | 113.9648 |
| 15.61224 | 76.327 | 14.12714 | 110.077  |
| 15.91837 | 76.327 | 15.17131 | 106.2767 |
| 16.22449 | 76.327 | 16.21703 | 102.564  |
| 16.53061 | 76.327 | 17.2643  | 98.93877 |
| 16.83673 | 76.327 | 18.31312 | 95.40109 |
| 17.14286 | 76.327 | 19.36349 | 91.95094 |
| 17.44898 | 76.327 | 20.41542 | 88.58832 |
| 17.7551  | 76.327 | 21.4689  | 85.31323 |
| 18.06122 | 76.327 | 22.52393 | 82.12566 |
| 18.36735 | 76.327 | 23.58052 | 79.02563 |
| 18.67347 | 76.327 | 24.63865 | 76.01312 |
| 18.97959 | 76.327 | 25.69834 | 73.08815 |
| 19.28571 | 76.327 | 26.75959 | 70.2507  |
| 19.59184 | 76.327 | 27.82238 | 67.50078 |
| 19.89796 | 76.327 | 28.88673 | 64.83839 |
| 20.20408 | 76.327 | 29.95263 | 62.26353 |
| 20.5102  | 76.327 | 31.02008 | 59.7762  |
| 20.81633 | 76.327 | 32.08908 | 57.3764  |
| 21.12245 | 76.327 | 33.15964 | 55.06413 |
| 21.42857 | 76.327 | 34.23175 | 52.83938 |
| 21.73469 | 76.327 | 35.30541 | 50.70217 |
| 22.04082 | 76.327 | 36.38063 | 48.65249 |
| 22.34694 | 76.327 | 37.45739 | 46.69033 |
| 22.65306 | 76.327 | 38.53571 | 44.8157  |
| 22.95918 | 76.327 | 39.61559 | 43.02861 |
| 23.26531 | 76.327 | 40.69701 | 41.32904 |

|          |        |          |          |
|----------|--------|----------|----------|
| 23.57143 | 76.327 | 41.77999 | 39.717   |
| 23.87755 | 76.327 | 42.86452 | 38.19249 |
| 24.18367 | 76.327 | 43.9506  | 36.75551 |
| 24.4898  | 76.327 | 45.03823 | 35.40606 |
| 24.79592 | 76.327 | 46.12742 | 34.14413 |
| 25.10204 | 76.327 | 47.21816 | 32.96974 |
| 25.40816 | 76.327 | 48.31045 | 31.88288 |
| 25.71429 | 76.327 | 49.40429 | 30.88354 |
| 26.02041 | 76.327 | 50.49969 | 29.97173 |
| 26.32653 | 76.327 | 51.59664 | 29.14746 |
| 26.63265 | 76.327 | 52.69514 | 28.41071 |
| 26.93878 | 76.327 | 53.79519 | 27.76149 |
| 27.2449  | 76.327 | 54.8968  | 27.1998  |
| 27.55102 | 76.327 | 55.99996 | 26.72564 |
| 27.85714 | 76.327 | 57.10467 | 26.33901 |
| 28.16327 | 76.327 | 58.21094 | 26.03991 |
| 28.46939 | 76.327 | 59.31875 | 25.82834 |
| 28.77551 | 76.327 | 60.42812 | 25.70429 |
| 29.08163 | 76.327 | 61.53904 | 25.66778 |
| 29.38776 | 76.327 | 62.65152 | 25.71879 |
| 29.69388 | 76.327 | 63.76554 | 25.85734 |
| 30       | 76.327 | 64.88112 | 26.08341 |
| 15       | 76.837 | 12.01605 | 117.9196 |
| 15.30612 | 76.837 | 13.05861 | 113.9449 |
| 15.61224 | 76.837 | 14.10273 | 110.0578 |
| 15.91837 | 76.837 | 15.1484  | 106.2582 |
| 16.22449 | 76.837 | 16.19562 | 102.5462 |
| 16.53061 | 76.837 | 17.2444  | 98.92161 |
| 16.83673 | 76.837 | 18.29473 | 95.3846  |
| 17.14286 | 76.837 | 19.34661 | 91.93513 |
| 17.44898 | 76.837 | 20.40004 | 88.57318 |
| 17.7551  | 76.837 | 21.45502 | 85.29876 |
| 18.06122 | 76.837 | 22.51156 | 82.11187 |
| 18.36735 | 76.837 | 23.56965 | 79.0125  |
| 18.67347 | 76.837 | 24.62929 | 76.00067 |
| 18.97959 | 76.837 | 25.69049 | 73.07637 |
| 19.28571 | 76.837 | 26.75324 | 70.23959 |
| 19.59184 | 76.837 | 27.81754 | 67.49035 |
| 19.89796 | 76.837 | 28.88339 | 64.82863 |
| 20.20408 | 76.837 | 29.95079 | 62.25444 |
| 20.5102  | 76.837 | 31.01975 | 59.76779 |
| 20.81633 | 76.837 | 32.09026 | 57.36866 |
| 21.12245 | 76.837 | 33.16232 | 55.05706 |

|          |        |          |          |
|----------|--------|----------|----------|
| 21.42857 | 76.837 | 34.23594 | 52.83299 |
| 21.73469 | 76.837 | 35.31111 | 50.69645 |
| 22.04082 | 76.837 | 36.38783 | 48.64743 |
| 22.34694 | 76.837 | 37.4661  | 46.68595 |
| 22.65306 | 76.837 | 38.54592 | 44.812   |
| 22.95918 | 76.837 | 39.6273  | 43.02557 |
| 23.26531 | 76.837 | 40.71023 | 41.32668 |
| 23.57143 | 76.837 | 41.79471 | 39.71531 |
| 23.87755 | 76.837 | 42.88075 | 38.19147 |
| 24.18367 | 76.837 | 43.96833 | 36.75516 |
| 24.4898  | 76.837 | 45.05747 | 35.40639 |
| 24.79592 | 76.837 | 46.14817 | 34.14514 |
| 25.10204 | 76.837 | 47.24041 | 32.97142 |
| 25.40816 | 76.837 | 48.33421 | 31.88522 |
| 25.71429 | 76.837 | 49.42956 | 30.88656 |
| 26.02041 | 76.837 | 50.52646 | 29.97543 |
| 26.32653 | 76.837 | 51.62491 | 29.15182 |
| 26.63265 | 76.837 | 52.72492 | 28.41575 |
| 26.93878 | 76.837 | 53.82648 | 27.7672  |
| 27.2449  | 76.837 | 54.92959 | 27.20619 |
| 27.55102 | 76.837 | 56.03426 | 26.7327  |
| 27.85714 | 76.837 | 57.14047 | 26.34674 |
| 28.16327 | 76.837 | 58.24824 | 26.04831 |
| 28.46939 | 76.837 | 59.35757 | 25.83741 |
| 28.77551 | 76.837 | 60.46844 | 25.71404 |
| 29.08163 | 76.837 | 61.58087 | 25.6782  |
| 29.38776 | 76.837 | 62.69485 | 25.72989 |
| 29.69388 | 76.837 | 63.81038 | 25.86911 |
| 30       | 76.837 | 64.92746 | 26.09585 |
| 15       | 77.347 | 11.98721 | 117.8972 |
| 15.30612 | 77.347 | 13.03128 | 113.9232 |
| 15.61224 | 77.347 | 14.0769  | 110.0367 |
| 15.91837 | 77.347 | 15.12408 | 106.2378 |
| 16.22449 | 77.347 | 16.17281 | 102.5264 |
| 16.53061 | 77.347 | 17.22309 | 98.90256 |
| 16.83673 | 77.347 | 18.27492 | 95.36622 |
| 17.14286 | 77.347 | 19.3283  | 91.91742 |
| 17.44898 | 77.347 | 20.38324 | 88.55614 |
| 17.7551  | 77.347 | 21.43973 | 85.28239 |
| 18.06122 | 77.347 | 22.49778 | 82.09618 |
| 18.36735 | 77.347 | 23.55737 | 78.99749 |
| 18.67347 | 77.347 | 24.61852 | 75.98633 |
| 18.97959 | 77.347 | 25.68122 | 73.0627  |



|          |        |          |          |
|----------|--------|----------|----------|
| 19.28571 | 77.347 | 26.74547 | 70.22659 |
| 19.59184 | 77.347 | 27.81128 | 67.47802 |
| 19.89796 | 77.347 | 28.87864 | 64.81698 |
| 20.20408 | 77.347 | 29.94755 | 62.24346 |
| 20.5102  | 77.347 | 31.01801 | 59.75748 |
| 20.81633 | 77.347 | 32.09002 | 57.35902 |
| 21.12245 | 77.347 | 33.16359 | 55.04809 |
| 21.42857 | 77.347 | 34.23871 | 52.8247  |
| 21.73469 | 77.347 | 35.31539 | 50.68883 |
| 22.04082 | 77.347 | 36.39361 | 48.64049 |
| 22.34694 | 77.347 | 37.47339 | 46.67968 |
| 22.65306 | 77.347 | 38.55472 | 44.8064  |
| 22.95918 | 77.347 | 39.6376  | 43.02065 |
| 23.26531 | 77.347 | 40.72204 | 41.32242 |
| 23.57143 | 77.347 | 41.80802 | 39.71173 |
| 23.87755 | 77.347 | 42.89556 | 38.18857 |
| 24.18367 | 77.347 | 43.98466 | 36.75293 |
| 24.4898  | 77.347 | 45.0753  | 35.40482 |
| 24.79592 | 77.347 | 46.1675  | 34.14425 |
| 25.10204 | 77.347 | 47.26125 | 32.9712  |
| 25.40816 | 77.347 | 48.35655 | 31.88568 |
| 25.71429 | 77.347 | 49.45341 | 30.88769 |
| 26.02041 | 77.347 | 50.55181 | 29.97723 |
| 26.32653 | 77.347 | 51.65177 | 29.1543  |
| 26.63265 | 77.347 | 52.75329 | 28.4189  |
| 26.93878 | 77.347 | 53.85635 | 27.77102 |
| 27.2449  | 77.347 | 54.96097 | 27.21068 |
| 27.55102 | 77.347 | 56.06714 | 26.73787 |
| 27.85714 | 77.347 | 57.17486 | 26.35258 |
| 28.16327 | 77.347 | 58.28414 | 26.05482 |
| 28.46939 | 77.347 | 59.39496 | 25.8446  |
| 28.77551 | 77.347 | 60.50734 | 25.7219  |
| 29.08163 | 77.347 | 61.62127 | 25.68673 |
| 29.38776 | 77.347 | 62.73676 | 25.73909 |
| 29.69388 | 77.347 | 63.8538  | 25.87898 |
| 30       | 77.347 | 64.97239 | 26.1064  |
| 15       | 77.857 | 11.95695 | 117.8729 |
| 15.30612 | 77.857 | 13.00253 | 113.8996 |
| 15.61224 | 77.857 | 14.04966 | 110.0138 |
| 15.91837 | 77.857 | 15.09834 | 106.2155 |
| 16.22449 | 77.857 | 16.14857 | 102.5048 |
| 16.53061 | 77.857 | 17.20036 | 98.88161 |
| 16.83673 | 77.857 | 18.2537  | 95.34595 |

|          |        |          |          |
|----------|--------|----------|----------|
| 17.14286 | 77.857 | 19.30859 | 91.89782 |
| 17.44898 | 77.857 | 20.36503 | 88.53721 |
| 17.7551  | 77.857 | 21.42303 | 85.26414 |
| 18.06122 | 77.857 | 22.48257 | 82.07859 |
| 18.36735 | 77.857 | 23.54368 | 78.98058 |
| 18.67347 | 77.857 | 24.60633 | 75.97009 |
| 18.97959 | 77.857 | 25.67053 | 73.04713 |
| 19.28571 | 77.857 | 26.73629 | 70.2117  |
| 19.59184 | 77.857 | 27.8036  | 67.4638  |
| 19.89796 | 77.857 | 28.87247 | 64.80343 |
| 20.20408 | 77.857 | 29.94288 | 62.23059 |
| 20.5102  | 77.857 | 31.01485 | 59.74528 |
| 20.81633 | 77.857 | 32.08837 | 57.34749 |
| 21.12245 | 77.857 | 33.16344 | 55.03724 |
| 21.42857 | 77.857 | 34.24007 | 52.81452 |
| 21.73469 | 77.857 | 35.31825 | 50.67932 |
| 22.04082 | 77.857 | 36.39798 | 48.63165 |
| 22.34694 | 77.857 | 37.47926 | 46.67152 |
| 22.65306 | 77.857 | 38.5621  | 44.79891 |
| 22.95918 | 77.857 | 39.64649 | 43.01383 |
| 23.26531 | 77.857 | 40.73243 | 41.31628 |
| 23.57143 | 77.857 | 41.81992 | 39.70626 |
| 23.87755 | 77.857 | 42.90896 | 38.18377 |
| 24.18367 | 77.857 | 43.99956 | 36.7488  |
| 24.4898  | 77.857 | 45.09171 | 35.40137 |
| 24.79592 | 77.857 | 46.18542 | 34.14147 |
| 25.10204 | 77.857 | 47.28067 | 32.96909 |
| 25.40816 | 77.857 | 48.37748 | 31.88424 |
| 25.71429 | 77.857 | 49.47584 | 30.88693 |
| 26.02041 | 77.857 | 50.57575 | 29.97714 |
| 26.32653 | 77.857 | 51.67722 | 29.15488 |
| 26.63265 | 77.857 | 52.78024 | 28.42015 |
| 26.93878 | 77.857 | 53.88481 | 27.77295 |
| 27.2449  | 77.857 | 54.99093 | 27.21328 |
| 27.55102 | 77.857 | 56.0986  | 26.74114 |
| 27.85714 | 77.857 | 57.20783 | 26.35653 |
| 28.16327 | 77.857 | 58.31861 | 26.05944 |
| 28.46939 | 77.857 | 59.43094 | 25.84989 |
| 28.77551 | 77.857 | 60.54483 | 25.72786 |
| 29.08163 | 77.857 | 61.66027 | 25.69337 |
| 29.38776 | 77.857 | 62.77726 | 25.7464  |
| 29.69388 | 77.857 | 63.8958  | 25.88696 |
| 30       | 77.857 | 65.01589 | 26.11505 |

|          |        |          |          |
|----------|--------|----------|----------|
| 15       | 78.367 | 11.92528 | 117.8467 |
| 15.30612 | 78.367 | 12.97236 | 113.874  |
| 15.61224 | 78.367 | 14.021   | 109.9889 |
| 15.91837 | 78.367 | 15.07118 | 106.1913 |
| 16.22449 | 78.367 | 16.12292 | 102.4813 |
| 16.53061 | 78.367 | 17.17621 | 98.85877 |
| 16.83673 | 78.367 | 18.23106 | 95.32378 |
| 17.14286 | 78.367 | 19.28745 | 91.87632 |
| 17.44898 | 78.367 | 20.3454  | 88.51639 |
| 17.7551  | 78.367 | 21.4049  | 85.24399 |
| 18.06122 | 78.367 | 22.46596 | 82.05912 |
| 18.36735 | 78.367 | 23.52856 | 78.96177 |
| 18.67347 | 78.367 | 24.59272 | 75.95196 |
| 18.97959 | 78.367 | 25.65843 | 73.02967 |
| 19.28571 | 78.367 | 26.7257  | 70.19492 |
| 19.59184 | 78.367 | 27.79451 | 67.44769 |
| 19.89796 | 78.367 | 28.86488 | 64.78799 |
| 20.20408 | 78.367 | 29.9368  | 62.21582 |
| 20.5102  | 78.367 | 31.01028 | 59.73118 |
| 20.81633 | 78.367 | 32.0853  | 57.33407 |
| 21.12245 | 78.367 | 33.16188 | 55.02449 |
| 21.42857 | 78.367 | 34.24001 | 52.80244 |
| 21.73469 | 78.367 | 35.3197  | 50.66792 |
| 22.04082 | 78.367 | 36.40093 | 48.62092 |
| 22.34694 | 78.367 | 37.48372 | 46.66146 |
| 22.65306 | 78.367 | 38.56806 | 44.78952 |
| 22.95918 | 78.367 | 39.65396 | 43.00512 |
| 23.26531 | 78.367 | 40.7414  | 41.30824 |
| 23.57143 | 78.367 | 41.8304  | 39.69889 |
| 23.87755 | 78.367 | 42.92095 | 38.17707 |
| 24.18367 | 78.367 | 44.01305 | 36.74278 |
| 24.4898  | 78.367 | 45.10671 | 35.39602 |
| 24.79592 | 78.367 | 46.20192 | 34.13679 |
| 25.10204 | 78.367 | 47.29868 | 32.96509 |
| 25.40816 | 78.367 | 48.39699 | 31.88092 |
| 25.71429 | 78.367 | 49.49686 | 30.88427 |
| 26.02041 | 78.367 | 50.59828 | 29.97516 |
| 26.32653 | 78.367 | 51.70125 | 29.15357 |
| 26.63265 | 78.367 | 52.80577 | 28.41951 |
| 26.93878 | 78.367 | 53.91185 | 27.77299 |
| 27.2449  | 78.367 | 55.01947 | 27.21399 |
| 27.55102 | 78.367 | 56.12865 | 26.74252 |
| 27.85714 | 78.367 | 57.23939 | 26.35858 |

|          |        |          |          |
|----------|--------|----------|----------|
| 28.16327 | 78.367 | 58.35167 | 26.06217 |
| 28.46939 | 78.367 | 59.46551 | 25.85329 |
| 28.77551 | 78.367 | 60.5809  | 25.73193 |
| 29.08163 | 78.367 | 61.69784 | 25.69811 |
| 29.38776 | 78.367 | 62.81634 | 25.75182 |
| 29.69388 | 78.367 | 63.93639 | 25.89305 |
| 30       | 78.367 | 65.05799 | 26.12182 |
| 15       | 78.878 | 11.8922  | 117.8186 |
| 15.30612 | 78.878 | 12.94078 | 113.8466 |
| 15.61224 | 78.878 | 13.99092 | 109.9622 |
| 15.91837 | 78.878 | 15.04261 | 106.1653 |
| 16.22449 | 78.878 | 16.09586 | 102.4559 |
| 16.53061 | 78.878 | 17.15065 | 98.83404 |
| 16.83673 | 78.878 | 18.207   | 95.29973 |
| 17.14286 | 78.878 | 19.26491 | 91.85294 |
| 17.44898 | 78.878 | 20.32436 | 88.49368 |
| 17.7551  | 78.878 | 21.38537 | 85.22195 |
| 18.06122 | 78.878 | 22.44793 | 82.03775 |
| 18.36735 | 78.878 | 23.51204 | 78.94108 |
| 18.67347 | 78.878 | 24.5777  | 75.93194 |
| 18.97959 | 78.878 | 25.64492 | 73.01033 |
| 19.28571 | 78.878 | 26.71369 | 70.17624 |
| 19.59184 | 78.878 | 27.78401 | 67.42969 |
| 19.89796 | 78.878 | 28.85588 | 64.77066 |
| 20.20408 | 78.878 | 29.92931 | 62.19917 |
| 20.5102  | 78.878 | 31.00429 | 59.7152  |
| 20.81633 | 78.878 | 32.08082 | 57.31876 |
| 21.12245 | 78.878 | 33.1589  | 55.00985 |
| 21.42857 | 78.878 | 34.23854 | 52.78847 |
| 21.73469 | 78.878 | 35.31973 | 50.65462 |
| 22.04082 | 78.878 | 36.40247 | 48.6083  |
| 22.34694 | 78.878 | 37.48676 | 46.64951 |
| 22.65306 | 78.878 | 38.57261 | 44.77825 |
| 22.95918 | 78.878 | 39.66001 | 42.99451 |
| 23.26531 | 78.878 | 40.74896 | 41.29831 |
| 23.57143 | 78.878 | 41.83946 | 39.68963 |
| 23.87755 | 78.878 | 42.93152 | 38.16849 |
| 24.18367 | 78.878 | 44.02513 | 36.73487 |
| 24.4898  | 78.878 | 45.12029 | 35.38878 |
| 24.79592 | 78.878 | 46.217   | 34.13022 |
| 25.10204 | 78.878 | 47.31527 | 32.95919 |
| 25.40816 | 78.878 | 48.41509 | 31.87569 |
| 25.71429 | 78.878 | 49.51646 | 30.87972 |

|          |        |          |          |
|----------|--------|----------|----------|
| 26.02041 | 78.878 | 50.61938 | 29.97128 |
| 26.32653 | 78.878 | 51.72386 | 29.15037 |
| 26.63265 | 78.878 | 52.82989 | 28.41698 |
| 26.93878 | 78.878 | 53.93747 | 27.77113 |
| 27.2449  | 78.878 | 55.0466  | 27.2128  |
| 27.55102 | 78.878 | 56.15729 | 26.74201 |
| 27.85714 | 78.878 | 57.26953 | 26.35874 |
| 28.16327 | 78.878 | 58.38332 | 26.063   |
| 28.46939 | 78.878 | 59.49866 | 25.85479 |
| 28.77551 | 78.878 | 60.61556 | 25.73411 |
| 29.08163 | 78.878 | 61.73401 | 25.70096 |
| 29.38776 | 78.878 | 62.85401 | 25.75534 |
| 29.69388 | 78.878 | 63.97556 | 25.89725 |
| 30       | 78.878 | 65.09867 | 26.12669 |
| 15       | 79.388 | 11.85769 | 117.7886 |
| 15.30612 | 79.388 | 12.90779 | 113.8173 |
| 15.61224 | 79.388 | 13.95943 | 109.9335 |
| 15.91837 | 79.388 | 15.01263 | 106.1373 |
| 16.22449 | 79.388 | 16.06738 | 102.4286 |
| 16.53061 | 79.388 | 17.12368 | 98.80742 |
| 16.83673 | 79.388 | 18.18153 | 95.27377 |
| 17.14286 | 79.388 | 19.24094 | 91.82766 |
| 17.44898 | 79.388 | 20.3019  | 88.46907 |
| 17.7551  | 79.388 | 21.36441 | 85.19802 |
| 18.06122 | 79.388 | 22.42848 | 82.01449 |
| 18.36735 | 79.388 | 23.4941  | 78.91849 |
| 18.67347 | 79.388 | 24.56126 | 75.91002 |
| 18.97959 | 79.388 | 25.62999 | 72.98908 |
| 19.28571 | 79.388 | 26.70026 | 70.15567 |
| 19.59184 | 79.388 | 27.77209 | 67.40979 |
| 19.89796 | 79.388 | 28.84547 | 64.75144 |
| 20.20408 | 79.388 | 29.9204  | 62.18062 |
| 20.5102  | 79.388 | 30.99688 | 59.69732 |
| 20.81633 | 79.388 | 32.07492 | 57.30156 |
| 21.12245 | 79.388 | 33.15451 | 54.99332 |
| 21.42857 | 79.388 | 34.23565 | 52.77261 |
| 21.73469 | 79.388 | 35.31835 | 50.63944 |
| 22.04082 | 79.388 | 36.40259 | 48.59379 |
| 22.34694 | 79.388 | 37.48839 | 46.63567 |
| 22.65306 | 79.388 | 38.57574 | 44.76508 |
| 22.95918 | 79.388 | 39.66465 | 42.98202 |
| 23.26531 | 79.388 | 40.7551  | 41.28649 |
| 23.57143 | 79.388 | 41.84711 | 39.67848 |

|          |        |          |          |
|----------|--------|----------|----------|
| 23.87755 | 79.388 | 42.94068 | 38.15801 |
| 24.18367 | 79.388 | 44.03579 | 36.72507 |
| 24.4898  | 79.388 | 45.13246 | 35.37965 |
| 24.79592 | 79.388 | 46.23068 | 34.12177 |
| 25.10204 | 79.388 | 47.33045 | 32.95141 |
| 25.40816 | 79.388 | 48.43177 | 31.86858 |
| 25.71429 | 79.388 | 49.53465 | 30.87328 |
| 26.02041 | 79.388 | 50.63908 | 29.96551 |
| 26.32653 | 79.388 | 51.74506 | 29.14527 |
| 26.63265 | 79.388 | 52.85259 | 28.41256 |
| 26.93878 | 79.388 | 53.96168 | 27.76738 |
| 27.2449  | 79.388 | 55.07232 | 27.20973 |
| 27.55102 | 79.388 | 56.18451 | 26.7396  |
| 27.85714 | 79.388 | 57.29825 | 26.35701 |
| 28.16327 | 79.388 | 58.41355 | 26.06194 |
| 28.46939 | 79.388 | 59.5304  | 25.85441 |
| 28.77551 | 79.388 | 60.6488  | 25.7344  |
| 29.08163 | 79.388 | 61.76875 | 25.70192 |
| 29.38776 | 79.388 | 62.89026 | 25.75697 |
| 29.69388 | 79.388 | 64.01332 | 25.89956 |
| 30       | 79.388 | 65.13793 | 26.12966 |
| 15       | 79.898 | 11.82178 | 117.7567 |
| 15.30612 | 79.898 | 12.87337 | 113.7861 |
| 15.61224 | 79.898 | 13.92652 | 109.903  |
| 15.91837 | 79.898 | 14.98123 | 106.1074 |
| 16.22449 | 79.898 | 16.03748 | 102.3994 |
| 16.53061 | 79.898 | 17.09529 | 98.7789  |
| 16.83673 | 79.898 | 18.15465 | 95.24593 |
| 17.14286 | 79.898 | 19.21556 | 91.80049 |
| 17.44898 | 79.898 | 20.27803 | 88.44258 |
| 17.7551  | 79.898 | 21.34205 | 85.17219 |
| 18.06122 | 79.898 | 22.40762 | 81.98934 |
| 18.36735 | 79.898 | 23.47474 | 78.89401 |
| 18.67347 | 79.898 | 24.54341 | 75.88622 |
| 18.97959 | 79.898 | 25.61364 | 72.96595 |
| 19.28571 | 79.898 | 26.68542 | 70.13321 |
| 19.59184 | 79.898 | 27.75875 | 67.388   |
| 19.89796 | 79.898 | 28.83364 | 64.73032 |
| 20.20408 | 79.898 | 29.91007 | 62.16017 |
| 20.5102  | 79.898 | 30.98806 | 59.67755 |
| 20.81633 | 79.898 | 32.06761 | 57.28246 |
| 21.12245 | 79.898 | 33.1487  | 54.9749  |
| 21.42857 | 79.898 | 34.23135 | 52.75486 |

|          |        |          |          |
|----------|--------|----------|----------|
| 21.73469 | 79.898 | 35.31555 | 50.62236 |
| 22.04082 | 79.898 | 36.4013  | 48.57738 |
| 22.34694 | 79.898 | 37.4886  | 46.61994 |
| 22.65306 | 79.898 | 38.57746 | 44.75002 |
| 22.95918 | 79.898 | 39.66787 | 42.96763 |
| 23.26531 | 79.898 | 40.75983 | 41.27277 |
| 23.57143 | 79.898 | 41.85335 | 39.66544 |
| 23.87755 | 79.898 | 42.94842 | 38.14564 |
| 24.18367 | 79.898 | 44.04503 | 36.71337 |
| 24.4898  | 79.898 | 45.14321 | 35.36863 |
| 24.79592 | 79.898 | 46.24293 | 34.11141 |
| 25.10204 | 79.898 | 47.34421 | 32.94173 |
| 25.40816 | 79.898 | 48.44704 | 31.85957 |
| 25.71429 | 79.898 | 49.55142 | 30.86495 |
| 26.02041 | 79.898 | 50.65735 | 29.95785 |
| 26.32653 | 79.898 | 51.76484 | 29.13829 |
| 26.63265 | 79.898 | 52.87388 | 28.40625 |
| 26.93878 | 79.898 | 53.98447 | 27.76174 |
| 27.2449  | 79.898 | 55.09662 | 27.20476 |
| 27.55102 | 79.898 | 56.21031 | 26.73531 |
| 27.85714 | 79.898 | 57.32556 | 26.35339 |
| 28.16327 | 79.898 | 58.44236 | 26.05899 |
| 28.46939 | 79.898 | 59.56072 | 25.85213 |
| 28.77551 | 79.898 | 60.68063 | 25.7328  |
| 29.08163 | 79.898 | 61.80208 | 25.70099 |
| 29.38776 | 79.898 | 62.9251  | 25.75671 |
| 29.69388 | 79.898 | 64.04966 | 25.89997 |
| 30       | 79.898 | 65.17578 | 26.13075 |
| 15       | 80.408 | 11.78444 | 117.7229 |
| 15.30612 | 80.408 | 12.83755 | 113.753  |
| 15.61224 | 80.408 | 13.8922  | 109.8706 |
| 15.91837 | 80.408 | 14.94841 | 106.0757 |
| 16.22449 | 80.408 | 16.00617 | 102.3683 |
| 16.53061 | 80.408 | 17.06548 | 98.74849 |
| 16.83673 | 80.408 | 18.12635 | 95.2162  |
| 17.14286 | 80.408 | 19.18877 | 91.77143 |
| 17.44898 | 80.408 | 20.25274 | 88.41419 |
| 17.7551  | 80.408 | 21.31826 | 85.14448 |
| 18.06122 | 80.408 | 22.38534 | 81.96229 |
| 18.36735 | 80.408 | 23.45396 | 78.86764 |
| 18.67347 | 80.408 | 24.52414 | 75.86052 |
| 18.97959 | 80.408 | 25.59588 | 72.94092 |
| 19.28571 | 80.408 | 26.66916 | 70.10886 |

|          |        |          |          |
|----------|--------|----------|----------|
| 19.59184 | 80.408 | 27.744   | 67.36432 |
| 19.89796 | 80.408 | 28.82039 | 64.70731 |
| 20.20408 | 80.408 | 29.89833 | 62.13784 |
| 20.5102  | 80.408 | 30.97783 | 59.65589 |
| 20.81633 | 80.408 | 32.05888 | 57.26147 |
| 21.12245 | 80.408 | 33.14148 | 54.95458 |
| 21.42857 | 80.408 | 34.22563 | 52.73522 |
| 21.73469 | 80.408 | 35.31133 | 50.60339 |
| 22.04082 | 80.408 | 36.39859 | 48.55908 |
| 22.34694 | 80.408 | 37.4874  | 46.60231 |
| 22.65306 | 80.408 | 38.57776 | 44.73306 |
| 22.95918 | 80.408 | 39.66968 | 42.95135 |
| 23.26531 | 80.408 | 40.76315 | 41.25716 |
| 23.57143 | 80.408 | 41.85817 | 39.65051 |
| 23.87755 | 80.408 | 42.95474 | 38.13138 |
| 24.18367 | 80.408 | 44.05286 | 36.69978 |
| 24.4898  | 80.408 | 45.15254 | 35.35571 |
| 24.79592 | 80.408 | 46.25377 | 34.09917 |
| 25.10204 | 80.408 | 47.35655 | 32.93016 |
| 25.40816 | 80.408 | 48.46089 | 31.84868 |
| 25.71429 | 80.408 | 49.56678 | 30.85472 |
| 26.02041 | 80.408 | 50.67422 | 29.9483  |
| 26.32653 | 80.408 | 51.78321 | 29.12941 |
| 26.63265 | 80.408 | 52.89375 | 28.39804 |
| 26.93878 | 80.408 | 54.00585 | 27.7542  |
| 27.2449  | 80.408 | 55.1195  | 27.1979  |
| 27.55102 | 80.408 | 56.2347  | 26.72912 |
| 27.85714 | 80.408 | 57.35146 | 26.34787 |
| 28.16327 | 80.408 | 58.46976 | 26.05415 |
| 28.46939 | 80.408 | 59.58962 | 25.84796 |
| 28.77551 | 80.408 | 60.71104 | 25.7293  |
| 29.08163 | 80.408 | 61.834   | 25.69817 |
| 29.38776 | 80.408 | 62.95852 | 25.75456 |
| 29.69388 | 80.408 | 64.08459 | 25.89849 |
| 30       | 80.408 | 65.21221 | 26.12994 |
| 15       | 80.918 | 11.7457  | 117.6873 |
| 15.30612 | 80.918 | 12.80031 | 113.718  |
| 15.61224 | 80.918 | 13.85647 | 109.8363 |
| 15.91837 | 80.918 | 14.91418 | 106.042  |
| 16.22449 | 80.918 | 15.97345 | 102.3354 |
| 16.53061 | 80.918 | 17.03426 | 98.71619 |
| 16.83673 | 80.918 | 18.09663 | 95.18457 |
| 17.14286 | 80.918 | 19.16056 | 91.74047 |



|          |        |          |          |
|----------|--------|----------|----------|
| 17.44898 | 80.918 | 20.22603 | 88.3839  |
| 17.7551  | 80.918 | 21.29306 | 85.11487 |
| 18.06122 | 80.918 | 22.36164 | 81.93336 |
| 18.36735 | 80.918 | 23.43178 | 78.83938 |
| 18.67347 | 80.918 | 24.50346 | 75.83293 |
| 18.97959 | 80.918 | 25.5767  | 72.914   |
| 19.28571 | 80.918 | 26.65149 | 70.08261 |
| 19.59184 | 80.918 | 27.72783 | 67.33875 |
| 19.89796 | 80.918 | 28.80573 | 64.68241 |
| 20.20408 | 80.918 | 29.88518 | 62.11361 |
| 20.5102  | 80.918 | 30.96618 | 59.63233 |
| 20.81633 | 80.918 | 32.04873 | 57.23859 |
| 21.12245 | 80.918 | 33.13284 | 54.93237 |
| 21.42857 | 80.918 | 34.21849 | 52.71368 |
| 21.73469 | 80.918 | 35.30571 | 50.58252 |
| 22.04082 | 80.918 | 36.39447 | 48.53889 |
| 22.34694 | 80.918 | 37.48478 | 46.58279 |
| 22.65306 | 80.918 | 38.57665 | 44.71422 |
| 22.95918 | 80.918 | 39.67007 | 42.93318 |
| 23.26531 | 80.918 | 40.76504 | 41.23966 |
| 23.57143 | 80.918 | 41.86157 | 39.63368 |
| 23.87755 | 80.918 | 42.95965 | 38.11522 |
| 24.18367 | 80.918 | 44.05928 | 36.6843  |
| 24.4898  | 80.918 | 45.16046 | 35.3409  |
| 24.79592 | 80.918 | 46.2632  | 34.08503 |
| 25.10204 | 80.918 | 47.36748 | 32.91669 |
| 25.40816 | 80.918 | 48.47332 | 31.83589 |
| 25.71429 | 80.918 | 49.58072 | 30.84261 |
| 26.02041 | 80.918 | 50.68966 | 29.93685 |
| 26.32653 | 80.918 | 51.80016 | 29.11863 |
| 26.63265 | 80.918 | 52.91221 | 28.38794 |
| 26.93878 | 80.918 | 54.02581 | 27.74478 |
| 27.2449  | 80.918 | 55.14097 | 27.18914 |
| 27.55102 | 80.918 | 56.25768 | 26.72104 |
| 27.85714 | 80.918 | 57.37594 | 26.34046 |
| 28.16327 | 80.918 | 58.49575 | 26.04741 |
| 28.46939 | 80.918 | 59.61711 | 25.8419  |
| 28.77551 | 80.918 | 60.74003 | 25.72391 |
| 29.08163 | 80.918 | 61.8645  | 25.69345 |
| 29.38776 | 80.918 | 62.99052 | 25.75052 |
| 29.69388 | 80.918 | 64.1181  | 25.89512 |
| 30       | 80.918 | 65.24723 | 26.12724 |
| 15       | 81.429 | 11.70553 | 117.6497 |

|          |        |          |          |
|----------|--------|----------|----------|
| 15.30612 | 81.429 | 12.76165 | 113.6811 |
| 15.61224 | 81.429 | 13.81931 | 109.8    |
| 15.91837 | 81.429 | 14.87853 | 106.0065 |
| 16.22449 | 81.429 | 15.9393  | 102.3005 |
| 16.53061 | 81.429 | 17.00163 | 98.682   |
| 16.83673 | 81.429 | 18.0655  | 95.15105 |
| 17.14286 | 81.429 | 19.13093 | 91.70762 |
| 17.44898 | 81.429 | 20.19791 | 88.35173 |
| 17.7551  | 81.429 | 21.26645 | 85.08336 |
| 18.06122 | 81.429 | 22.33653 | 81.90253 |
| 18.36735 | 81.429 | 23.40817 | 78.80922 |
| 18.67347 | 81.429 | 24.48136 | 75.80344 |
| 18.97959 | 81.429 | 25.55611 | 72.88519 |
| 19.28571 | 81.429 | 26.6324  | 70.05447 |
| 19.59184 | 81.429 | 27.71025 | 67.31128 |
| 19.89796 | 81.429 | 28.78965 | 64.65562 |
| 20.20408 | 81.429 | 29.87061 | 62.08749 |
| 20.5102  | 81.429 | 30.95311 | 59.60689 |
| 20.81633 | 81.429 | 32.03717 | 57.21381 |
| 21.12245 | 81.429 | 33.12278 | 54.90827 |
| 21.42857 | 81.429 | 34.20995 | 52.69025 |
| 21.73469 | 81.429 | 35.29866 | 50.55977 |
| 22.04082 | 81.429 | 36.38893 | 48.51681 |
| 22.34694 | 81.429 | 37.48075 | 46.56138 |
| 22.65306 | 81.429 | 38.57412 | 44.69348 |
| 22.95918 | 81.429 | 39.66905 | 42.91311 |
| 23.26531 | 81.429 | 40.76553 | 41.22027 |
| 23.57143 | 81.429 | 41.86356 | 39.61496 |
| 23.87755 | 81.429 | 42.96314 | 38.09718 |
| 24.18367 | 81.429 | 44.06428 | 36.66692 |
| 24.4898  | 81.429 | 45.16697 | 35.3242  |
| 24.79592 | 81.429 | 46.27121 | 34.069   |
| 25.10204 | 81.429 | 47.377   | 32.90134 |
| 25.40816 | 81.429 | 48.48434 | 31.8212  |
| 25.71429 | 81.429 | 49.59324 | 30.82859 |
| 26.02041 | 81.429 | 50.70369 | 29.92352 |
| 26.32653 | 81.429 | 51.8157  | 29.10597 |
| 26.63265 | 81.429 | 52.92925 | 28.37595 |
| 26.93878 | 81.429 | 54.04436 | 27.73346 |
| 27.2449  | 81.429 | 55.16102 | 27.17849 |
| 27.55102 | 81.429 | 56.27923 | 26.71106 |
| 27.85714 | 81.429 | 57.399   | 26.33116 |
| 28.16327 | 81.429 | 58.52032 | 26.03878 |

|          |        |          |          |
|----------|--------|----------|----------|
| 28.46939 | 81.429 | 59.64319 | 25.83394 |
| 28.77551 | 81.429 | 60.76761 | 25.71662 |
| 29.08163 | 81.429 | 61.89359 | 25.68684 |
| 29.38776 | 81.429 | 63.02111 | 25.74458 |
| 29.69388 | 81.429 | 64.15019 | 25.88985 |
| 30       | 81.429 | 65.28083 | 26.12265 |
| 15       | 81.939 | 11.66396 | 117.6103 |
| 15.30612 | 81.939 | 12.72157 | 113.6423 |
| 15.61224 | 81.939 | 13.78075 | 109.7619 |
| 15.91837 | 81.939 | 14.84147 | 105.9691 |
| 16.22449 | 81.939 | 15.90375 | 102.2637 |
| 16.53061 | 81.939 | 16.96758 | 98.64591 |
| 16.83673 | 81.939 | 18.03296 | 95.11563 |
| 17.14286 | 81.939 | 19.09989 | 91.67288 |
| 17.44898 | 81.939 | 20.16838 | 88.31766 |
| 17.7551  | 81.939 | 21.23842 | 85.04997 |
| 18.06122 | 81.939 | 22.31001 | 81.8698  |
| 18.36735 | 81.939 | 23.38315 | 78.77717 |
| 18.67347 | 81.939 | 24.45785 | 75.77207 |
| 18.97959 | 81.939 | 25.5341  | 72.85449 |
| 19.28571 | 81.939 | 26.6119  | 70.02444 |
| 19.59184 | 81.939 | 27.69125 | 67.28192 |
| 19.89796 | 81.939 | 28.77216 | 64.62694 |
| 20.20408 | 81.939 | 29.85462 | 62.05948 |
| 20.5102  | 81.939 | 30.93863 | 59.57955 |
| 20.81633 | 81.939 | 32.02419 | 57.18714 |
| 21.12245 | 81.939 | 33.11131 | 54.88227 |
| 21.42857 | 81.939 | 34.19998 | 52.66493 |
| 21.73469 | 81.939 | 35.2902  | 50.53512 |
| 22.04082 | 81.939 | 36.38197 | 48.49283 |
| 22.34694 | 81.939 | 37.4753  | 46.53808 |
| 22.65306 | 81.939 | 38.57018 | 44.67085 |
| 22.95918 | 81.939 | 39.66661 | 42.89115 |
| 23.26531 | 81.939 | 40.76459 | 41.19899 |
| 23.57143 | 81.939 | 41.86413 | 39.59435 |
| 23.87755 | 81.939 | 42.96522 | 38.07724 |
| 24.18367 | 81.939 | 44.06786 | 36.64766 |
| 24.4898  | 81.939 | 45.17205 | 35.30561 |
| 24.79592 | 81.939 | 46.2778  | 34.05108 |
| 25.10204 | 81.939 | 47.3851  | 32.88409 |
| 25.40816 | 81.939 | 48.49395 | 31.80463 |
| 25.71429 | 81.939 | 49.60435 | 30.81269 |
| 26.02041 | 81.939 | 50.71631 | 29.90829 |

|          |        |          |          |
|----------|--------|----------|----------|
| 26.32653 | 81.939 | 51.82982 | 29.09141 |
| 26.63265 | 81.939 | 52.94488 | 28.36206 |
| 26.93878 | 81.939 | 54.06149 | 27.72024 |
| 27.2449  | 81.939 | 55.17966 | 27.16596 |
| 27.55102 | 81.939 | 56.29938 | 26.6992  |
| 27.85714 | 81.939 | 57.42065 | 26.31997 |
| 28.16327 | 81.939 | 58.54347 | 26.02826 |
| 28.46939 | 81.939 | 59.66785 | 25.82409 |
| 28.77551 | 81.939 | 60.79377 | 25.70745 |
| 29.08163 | 81.939 | 61.92126 | 25.67833 |
| 29.38776 | 81.939 | 63.05029 | 25.73675 |
| 29.69388 | 81.939 | 64.18087 | 25.88269 |
| 30       | 81.939 | 65.31301 | 26.11617 |
| 15       | 82.449 | 11.62096 | 117.5689 |
| 15.30612 | 82.449 | 12.68009 | 113.6017 |
| 15.61224 | 82.449 | 13.74076 | 109.7219 |
| 15.91837 | 82.449 | 14.80299 | 105.9297 |
| 16.22449 | 82.449 | 15.86678 | 102.2251 |
| 16.53061 | 82.449 | 16.93211 | 98.60794 |
| 16.83673 | 82.449 | 17.999   | 95.07833 |
| 17.14286 | 82.449 | 19.06744 | 91.63625 |
| 17.44898 | 82.449 | 20.13743 | 88.2817  |
| 17.7551  | 82.449 | 21.20897 | 85.01468 |
| 18.06122 | 82.449 | 22.28207 | 81.83519 |
| 18.36735 | 82.449 | 23.35672 | 78.74323 |
| 18.67347 | 82.449 | 24.43292 | 75.7388  |
| 18.97959 | 82.449 | 25.51068 | 72.82189 |
| 19.28571 | 82.449 | 26.58998 | 69.99252 |
| 19.59184 | 82.449 | 27.67084 | 67.25067 |
| 19.89796 | 82.449 | 28.75325 | 64.59636 |
| 20.20408 | 82.449 | 29.83722 | 62.02957 |
| 20.5102  | 82.449 | 30.92273 | 59.55031 |
| 20.81633 | 82.449 | 32.0098  | 57.15859 |
| 21.12245 | 82.449 | 33.09843 | 54.85439 |
| 21.42857 | 82.449 | 34.1886  | 52.63772 |
| 21.73469 | 82.449 | 35.28033 | 50.50858 |
| 22.04082 | 82.449 | 36.37361 | 48.46696 |
| 22.34694 | 82.449 | 37.46844 | 46.51288 |
| 22.65306 | 82.449 | 38.56482 | 44.64633 |
| 22.95918 | 82.449 | 39.66276 | 42.8673  |
| 23.26531 | 82.449 | 40.76225 | 41.17581 |
| 23.57143 | 82.449 | 41.86329 | 39.57184 |
| 23.87755 | 82.449 | 42.96588 | 38.05541 |

|          |        |          |          |
|----------|--------|----------|----------|
| 24.18367 | 82.449 | 44.07003 | 36.6265  |
| 24.4898  | 82.449 | 45.17573 | 35.28512 |
| 24.79592 | 82.449 | 46.28298 | 34.03127 |
| 25.10204 | 82.449 | 47.39178 | 32.86495 |
| 25.40816 | 82.449 | 48.50214 | 31.78616 |
| 25.71429 | 82.449 | 49.61405 | 30.7949  |
| 26.02041 | 82.449 | 50.72751 | 29.89116 |
| 26.32653 | 82.449 | 51.84252 | 29.07496 |
| 26.63265 | 82.449 | 52.95909 | 28.34629 |
| 26.93878 | 82.449 | 54.07721 | 27.70514 |
| 27.2449  | 82.449 | 55.19688 | 27.15152 |
| 27.55102 | 82.449 | 56.3181  | 26.68544 |
| 27.85714 | 82.449 | 57.44088 | 26.30688 |
| 28.16327 | 82.449 | 58.56521 | 26.01585 |
| 28.46939 | 82.449 | 59.69109 | 25.81235 |
| 28.77551 | 82.449 | 60.81852 | 25.69638 |
| 29.08163 | 82.449 | 61.94751 | 25.66794 |
| 29.38776 | 82.449 | 63.07805 | 25.72703 |
| 29.69388 | 82.449 | 64.21014 | 25.87364 |
| 30       | 82.449 | 65.34378 | 26.10779 |
| 15       | 82.959 | 11.57655 | 117.5257 |
| 15.30612 | 82.959 | 12.63718 | 113.5591 |
| 15.61224 | 82.959 | 13.69937 | 109.68   |
| 15.91837 | 82.959 | 14.7631  | 105.8885 |
| 16.22449 | 82.959 | 15.82839 | 102.1845 |
| 16.53061 | 82.959 | 16.89523 | 98.56806 |
| 16.83673 | 82.959 | 17.96362 | 95.03913 |
| 17.14286 | 82.959 | 19.03356 | 91.59772 |
| 17.44898 | 82.959 | 20.10506 | 88.24385 |
| 17.7551  | 82.959 | 21.17811 | 84.9775  |
| 18.06122 | 82.959 | 22.25271 | 81.79868 |
| 18.36735 | 82.959 | 23.32887 | 78.70739 |
| 18.67347 | 82.959 | 24.40658 | 75.70363 |
| 18.97959 | 82.959 | 25.48584 | 72.7874  |
| 19.28571 | 82.959 | 26.56665 | 69.9587  |
| 19.59184 | 82.959 | 27.64901 | 67.21753 |
| 19.89796 | 82.959 | 28.73293 | 64.56389 |
| 20.20408 | 82.959 | 29.8184  | 61.99777 |
| 20.5102  | 82.959 | 30.90542 | 59.51919 |
| 20.81633 | 82.959 | 31.994   | 57.12813 |
| 21.12245 | 82.959 | 33.08412 | 54.82461 |
| 21.42857 | 82.959 | 34.1758  | 52.60861 |
| 21.73469 | 82.959 | 35.26904 | 50.48014 |

|          |        |          |          |
|----------|--------|----------|----------|
| 22.04082 | 82.959 | 36.36382 | 48.4392  |
| 22.34694 | 82.959 | 37.46016 | 46.48579 |
| 22.65306 | 82.959 | 38.55805 | 44.61991 |
| 22.95918 | 82.959 | 39.65749 | 42.84156 |
| 23.26531 | 82.959 | 40.75848 | 41.15074 |
| 23.57143 | 82.959 | 41.86103 | 39.54744 |
| 23.87755 | 82.959 | 42.96513 | 38.03168 |
| 24.18367 | 82.959 | 44.07078 | 36.60345 |
| 24.4898  | 82.959 | 45.17799 | 35.26274 |
| 24.79592 | 82.959 | 46.28674 | 34.00956 |
| 25.10204 | 82.959 | 47.39705 | 32.84392 |
| 25.40816 | 82.959 | 48.50891 | 31.7658  |
| 25.71429 | 82.959 | 49.62233 | 30.77521 |
| 26.02041 | 82.959 | 50.73729 | 29.87215 |
| 26.32653 | 82.959 | 51.85381 | 29.05662 |
| 26.63265 | 82.959 | 52.97189 | 28.32862 |
| 26.93878 | 82.959 | 54.09151 | 27.68814 |
| 27.2449  | 82.959 | 55.21269 | 27.1352  |
| 27.55102 | 82.959 | 56.33542 | 26.66979 |
| 27.85714 | 82.959 | 57.4597  | 26.2919  |
| 28.16327 | 82.959 | 58.58553 | 26.00154 |
| 28.46939 | 82.959 | 59.71292 | 25.79872 |
| 28.77551 | 82.959 | 60.84186 | 25.68342 |
| 29.08163 | 82.959 | 61.97235 | 25.65565 |
| 29.38776 | 82.959 | 63.10439 | 25.71541 |
| 29.69388 | 82.959 | 64.23799 | 25.8627  |
| 30       | 82.959 | 65.37314 | 26.09752 |
| 15       | 83.469 | 11.53073 | 117.4806 |
| 15.30612 | 83.469 | 12.59286 | 113.5146 |
| 15.61224 | 83.469 | 13.65655 | 109.6363 |
| 15.91837 | 83.469 | 14.72179 | 105.8454 |
| 16.22449 | 83.469 | 15.78858 | 102.1421 |
| 16.53061 | 83.469 | 16.85693 | 98.5263  |
| 16.83673 | 83.469 | 17.92683 | 94.99804 |
| 17.14286 | 83.469 | 18.99828 | 91.55731 |
| 17.44898 | 83.469 | 20.07128 | 88.2041  |
| 17.7551  | 83.469 | 21.14584 | 84.93843 |
| 18.06122 | 83.469 | 22.22194 | 81.76028 |
| 18.36735 | 83.469 | 23.2996  | 78.66967 |
| 18.67347 | 83.469 | 24.37882 | 75.66658 |
| 18.97959 | 83.469 | 25.45958 | 72.75102 |
| 19.28571 | 83.469 | 26.5419  | 69.92299 |
| 19.59184 | 83.469 | 27.62577 | 67.1825  |

|          |        |          |          |
|----------|--------|----------|----------|
| 19.89796 | 83.469 | 28.71119 | 64.52952 |
| 20.20408 | 83.469 | 29.79817 | 61.96408 |
| 20.5102  | 83.469 | 30.88669 | 59.48617 |
| 20.81633 | 83.469 | 31.97677 | 57.09579 |
| 21.12245 | 83.469 | 33.06841 | 54.79294 |
| 21.42857 | 83.469 | 34.16159 | 52.57761 |
| 21.73469 | 83.469 | 35.25633 | 50.44982 |
| 22.04082 | 83.469 | 36.35262 | 48.40955 |
| 22.34694 | 83.469 | 37.45046 | 46.45681 |
| 22.65306 | 83.469 | 38.54986 | 44.5916  |
| 22.95918 | 83.469 | 39.6508  | 42.81393 |
| 23.26531 | 83.469 | 40.7533  | 41.12378 |
| 23.57143 | 83.469 | 41.85736 | 39.52116 |
| 23.87755 | 83.469 | 42.96296 | 38.00606 |
| 24.18367 | 83.469 | 44.07012 | 36.5785  |
| 24.4898  | 83.469 | 45.17883 | 35.23847 |
| 24.79592 | 83.469 | 46.28909 | 33.98596 |
| 25.10204 | 83.469 | 47.40091 | 32.82099 |
| 25.40816 | 83.469 | 48.51427 | 31.74354 |
| 25.71429 | 83.469 | 49.62919 | 30.75363 |
| 26.02041 | 83.469 | 50.74566 | 29.85124 |
| 26.32653 | 83.469 | 51.86369 | 29.03638 |
| 26.63265 | 83.469 | 52.98327 | 28.30905 |
| 26.93878 | 83.469 | 54.1044  | 27.66925 |
| 27.2449  | 83.469 | 55.22708 | 27.11698 |
| 27.55102 | 83.469 | 56.35131 | 26.65224 |
| 27.85714 | 83.469 | 57.4771  | 26.27503 |
| 28.16327 | 83.469 | 58.60444 | 25.98535 |
| 28.46939 | 83.469 | 59.73333 | 25.78319 |
| 28.77551 | 83.469 | 60.86378 | 25.66857 |
| 29.08163 | 83.469 | 61.99577 | 25.64147 |
| 29.38776 | 83.469 | 63.12932 | 25.70191 |
| 29.69388 | 83.469 | 64.26442 | 25.84987 |
| 30       | 83.469 | 65.40108 | 26.08536 |
| 15       | 83.98  | 11.48349 | 117.4335 |
| 15.30612 | 83.98  | 12.54713 | 113.4683 |
| 15.61224 | 83.98  | 13.61232 | 109.5906 |
| 15.91837 | 83.98  | 14.67907 | 105.8004 |
| 16.22449 | 83.98  | 15.74737 | 102.0978 |
| 16.53061 | 83.98  | 16.81722 | 98.48265 |
| 16.83673 | 83.98  | 17.88862 | 94.95506 |
| 17.14286 | 83.98  | 18.96158 | 91.515   |
| 17.44898 | 83.98  | 20.03608 | 88.16247 |

|          |       |          |          |
|----------|-------|----------|----------|
| 17.7551  | 83.98 | 21.11214 | 84.89746 |
| 18.06122 | 83.98 | 22.18976 | 81.71999 |
| 18.36735 | 83.98 | 23.26892 | 78.63005 |
| 18.67347 | 83.98 | 24.34964 | 75.62763 |
| 18.97959 | 83.98 | 25.43191 | 72.71275 |
| 19.28571 | 83.98 | 26.51574 | 69.88539 |
| 19.59184 | 83.98 | 27.60111 | 67.14557 |
| 19.89796 | 83.98 | 28.68804 | 64.49327 |
| 20.20408 | 83.98 | 29.77652 | 61.9285  |
| 20.5102  | 83.98 | 30.86655 | 59.45126 |
| 20.81633 | 83.98 | 31.95814 | 57.06155 |
| 21.12245 | 83.98 | 33.05128 | 54.75937 |
| 21.42857 | 83.98 | 34.14597 | 52.54472 |
| 21.73469 | 83.98 | 35.24221 | 50.4176  |
| 22.04082 | 83.98 | 36.34    | 48.378   |
| 22.34694 | 83.98 | 37.43935 | 46.42594 |
| 22.65306 | 83.98 | 38.54025 | 44.5614  |
| 22.95918 | 83.98 | 39.6427  | 42.7844  |
| 23.26531 | 83.98 | 40.74671 | 41.09492 |
| 23.57143 | 83.98 | 41.85227 | 39.49297 |
| 23.87755 | 83.98 | 42.95938 | 37.97855 |
| 24.18367 | 83.98 | 44.06804 | 36.55167 |
| 24.4898  | 83.98 | 45.17826 | 35.2123  |
| 24.79592 | 83.98 | 46.29002 | 33.96047 |
| 25.10204 | 83.98 | 47.40334 | 32.79617 |
| 25.40816 | 83.98 | 48.51822 | 31.7194  |
| 25.71429 | 83.98 | 49.63464 | 30.73016 |
| 26.02041 | 83.98 | 50.75262 | 29.82844 |
| 26.32653 | 83.98 | 51.87215 | 29.01426 |
| 26.63265 | 83.98 | 52.99323 | 28.2876  |
| 26.93878 | 83.98 | 54.11587 | 27.64847 |
| 27.2449  | 83.98 | 55.24005 | 27.09687 |
| 27.55102 | 83.98 | 56.36579 | 26.63281 |
| 27.85714 | 83.98 | 57.49309 | 26.25627 |
| 28.16327 | 83.98 | 58.62193 | 25.96726 |
| 28.46939 | 83.98 | 59.75233 | 25.76577 |
| 28.77551 | 83.98 | 60.88428 | 25.65182 |
| 29.08163 | 83.98 | 62.01778 | 25.6254  |
| 29.38776 | 83.98 | 63.15283 | 25.68651 |
| 29.69388 | 83.98 | 64.28944 | 25.83514 |
| 30       | 83.98 | 65.4276  | 26.07131 |
| 15       | 84.49 | 11.43483 | 117.3846 |
| 15.30612 | 84.49 | 12.49998 | 113.4201 |



|          |       |          |          |
|----------|-------|----------|----------|
| 15.61224 | 84.49 | 13.56668 | 109.543  |
| 15.91837 | 84.49 | 14.63493 | 105.7535 |
| 16.22449 | 84.49 | 15.70473 | 102.0515 |
| 16.53061 | 84.49 | 16.77609 | 98.4371  |
| 16.83673 | 84.49 | 17.849   | 94.91018 |
| 17.14286 | 84.49 | 18.92346 | 91.47079 |
| 17.44898 | 84.49 | 19.99947 | 88.11894 |
| 17.7551  | 84.49 | 21.07704 | 84.85461 |
| 18.06122 | 84.49 | 22.15616 | 81.67781 |
| 18.36735 | 84.49 | 23.23683 | 78.58854 |
| 18.67347 | 84.49 | 24.31905 | 75.5868  |
| 18.97959 | 84.49 | 25.40283 | 72.67258 |
| 19.28571 | 84.49 | 26.48816 | 69.8459  |
| 19.59184 | 84.49 | 27.57504 | 67.10675 |
| 19.89796 | 84.49 | 28.66347 | 64.45512 |
| 20.20408 | 84.49 | 29.75346 | 61.89103 |
| 20.5102  | 84.49 | 30.84499 | 59.41446 |
| 20.81633 | 84.49 | 31.93808 | 57.02542 |
| 21.12245 | 84.49 | 33.03273 | 54.72391 |
| 21.42857 | 84.49 | 34.12892 | 52.50994 |
| 21.73469 | 84.49 | 35.22667 | 50.38349 |
| 22.04082 | 84.49 | 36.32597 | 48.34456 |
| 22.34694 | 84.49 | 37.42683 | 46.39317 |
| 22.65306 | 84.49 | 38.52923 | 44.52931 |
| 22.95918 | 84.49 | 39.63319 | 42.75298 |
| 23.26531 | 84.49 | 40.7387  | 41.06417 |
| 23.57143 | 84.49 | 41.84576 | 39.4629  |
| 23.87755 | 84.49 | 42.95438 | 37.94915 |
| 24.18367 | 84.49 | 44.06455 | 36.52294 |
| 24.4898  | 84.49 | 45.17627 | 35.18425 |
| 24.79592 | 84.49 | 46.28954 | 33.93309 |
| 25.10204 | 84.49 | 47.40437 | 32.76946 |
| 25.40816 | 84.49 | 48.52074 | 31.69336 |
| 25.71429 | 84.49 | 49.63867 | 30.70479 |
| 26.02041 | 84.49 | 50.75816 | 29.80375 |
| 26.32653 | 84.49 | 51.87919 | 28.99024 |
| 26.63265 | 84.49 | 53.00178 | 28.26425 |
| 26.93878 | 84.49 | 54.12592 | 27.6258  |
| 27.2449  | 84.49 | 55.25161 | 27.07487 |
| 27.55102 | 84.49 | 56.37886 | 26.61148 |
| 27.85714 | 84.49 | 57.50766 | 26.23561 |
| 28.16327 | 84.49 | 58.63801 | 25.94727 |
| 28.46939 | 84.49 | 59.76991 | 25.74646 |

|          |       |          |          |
|----------|-------|----------|----------|
| 28.77551 | 84.49 | 60.90337 | 25.63319 |
| 29.08163 | 84.49 | 62.03837 | 25.60744 |
| 29.38776 | 84.49 | 63.17493 | 25.66921 |
| 29.69388 | 84.49 | 64.31305 | 25.81852 |
| 30       | 84.49 | 65.45271 | 26.05536 |
| 15       | 85    | 11.38476 | 117.3338 |
| 15.30612 | 85    | 12.45141 | 113.3699 |
| 15.61224 | 85    | 13.51962 | 109.4936 |
| 15.91837 | 85    | 14.58937 | 105.7047 |
| 16.22449 | 85    | 15.66068 | 102.0034 |
| 16.53061 | 85    | 16.73355 | 98.38966 |
| 16.83673 | 85    | 17.80796 | 94.86341 |
| 17.14286 | 85    | 18.88393 | 91.4247  |
| 17.44898 | 85    | 19.96144 | 88.07351 |
| 17.7551  | 85    | 21.04052 | 84.80986 |
| 18.06122 | 85    | 22.12114 | 81.63373 |
| 18.36735 | 85    | 23.20332 | 78.54513 |
| 18.67347 | 85    | 24.28704 | 75.54406 |
| 18.97959 | 85    | 25.37233 | 72.63053 |
| 19.28571 | 85    | 26.45916 | 69.80451 |
| 19.59184 | 85    | 27.54755 | 67.06603 |
| 19.89796 | 85    | 28.63749 | 64.41508 |
| 20.20408 | 85    | 29.72898 | 61.85166 |
| 20.5102  | 85    | 30.82202 | 59.37577 |
| 20.81633 | 85    | 31.91662 | 56.9874  |
| 21.12245 | 85    | 33.01276 | 54.68657 |
| 21.42857 | 85    | 34.11047 | 52.47326 |
| 21.73469 | 85    | 35.20972 | 50.34748 |
| 22.04082 | 85    | 36.31053 | 48.30923 |
| 22.34694 | 85    | 37.41288 | 46.35852 |
| 22.65306 | 85    | 38.5168  | 44.49533 |
| 22.95918 | 85    | 39.62226 | 42.71967 |
| 23.26531 | 85    | 40.72927 | 41.03153 |
| 23.57143 | 85    | 41.83784 | 39.43093 |
| 23.87755 | 85    | 42.94796 | 37.91786 |
| 24.18367 | 85    | 44.05964 | 36.49231 |
| 24.4898  | 85    | 45.17286 | 35.1543  |
| 24.79592 | 85    | 46.28764 | 33.90381 |
| 25.10204 | 85    | 47.40397 | 32.74086 |
| 25.40816 | 85    | 48.52186 | 31.66543 |
| 25.71429 | 85    | 49.64129 | 30.67753 |
| 26.02041 | 85    | 50.76228 | 29.77716 |
| 26.32653 | 85    | 51.88482 | 28.96432 |

|          |    |          |          |
|----------|----|----------|----------|
| 26.63265 | 85 | 53.00891 | 28.23901 |
| 26.93878 | 85 | 54.13456 | 27.60123 |
| 27.2449  | 85 | 55.26176 | 27.05098 |
| 27.55102 | 85 | 56.39051 | 26.58826 |
| 27.85714 | 85 | 57.52081 | 26.21306 |
| 28.16327 | 85 | 58.65267 | 25.9254  |
| 28.46939 | 85 | 59.78608 | 25.72526 |
| 28.77551 | 85 | 60.92104 | 25.61266 |
| 29.08163 | 85 | 62.05755 | 25.58758 |
| 29.38776 | 85 | 63.19562 | 25.65003 |
| 29.69388 | 85 | 64.33523 | 25.80001 |
| 30       | 85 | 65.4764  | 26.03752 |
